# Supplementary material for: Quantitative Proteomics Reveals Transforming Growth Factor β Receptor Targeted by Resveratrol and Hesperetin Coformulation in Endothelial Cells
Source: PubMed Central journal article supplement — ACS Omega. 2023 Apr 25;8(18):16206–17. doi: 10.1021/acsomega.3c00678 (PMC10173440; doi:10.1021/acsomega.3c00678), 2023-04-25
Supplement: ao3c00678_si_001.pdf [file ao3c00678_si_001.pdf]

Supporting Information for:

# Quantitative Proteomics Reveals Transforming growth factor beta Receptor targeted by Resveratrol and Hesperetin Coformulation in Endothelial Cells

*<sup>1,2</sup> Aktham Mestareehi, PhD #; <sup>1</sup> Hainan Li, MS #; <sup>1,2</sup> Xiangmin Zhang, MD/PhD; <sup>1</sup> Sai Pranathi Meda Venkata, PhD; <sup>1,2</sup> Ruchi Jaiswal,*

*MS; Fu-Shin Yu; PhD<sup>1,3</sup>; <sup>1,2</sup> Zhengping Yi, PhD\*, <sup>1,4</sup> Jie-Mei Wang, MD/PhD\**

<sup>1</sup>Department of Pharmaceutical Sciences, Eugene Applebaum College of Pharmacy and Health Sciences; <sup>2</sup>Integrated Biosciences;

<sup>3</sup>Ophthalmology, Visual and Anatomical Sciences, School of Medicine; <sup>4</sup>Center for Molecular Medicine and Genetics; Wayne State

University, Detroit, MI.

Running title: tRES+HESP modulates endothelial cell proteome

# Both of the authors contributed equally to the manuscript.

\*Address correspondence to:

Jie-Mei Wang, MD/PhD, Department of Pharmaceutical Sciences, Eugene Applebaum College of Pharmacy and Health Sciences,  
Wayne State University. 259 Mack Ave, Suite 3122, Detroit, Michigan 48201. Tel: 313-577-1715; Email: [jiemei.wang@wayne.edu](mailto:jiemei.wang@wayne.edu).

Zhengping Yi, PhD, Integrated Biosciences; Department of Pharmaceutical Sciences, Eugene Applebaum College of Pharmacy and  
Health Sciences, Wayne State University, 259 Mack Ave, Suite 3146, Detroit, Michigan 48201. Tel: 313-577-0823; Email:  
[zhengping.yi@wayne.edu](mailto:zhengping.yi@wayne.edu).

Supplemental Figure 1

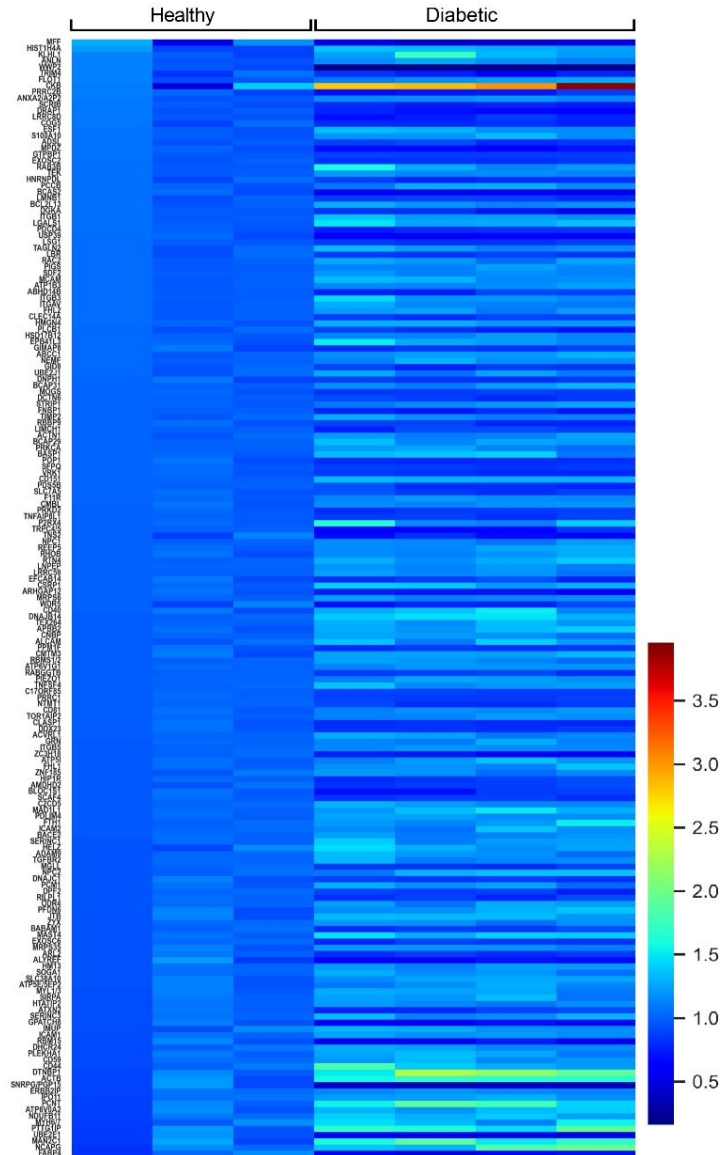

Supplemental Figure 1. Heatmap of 179 differentially expressed proteins and their abundance pattern in endothelial

Supplemental Figure 2

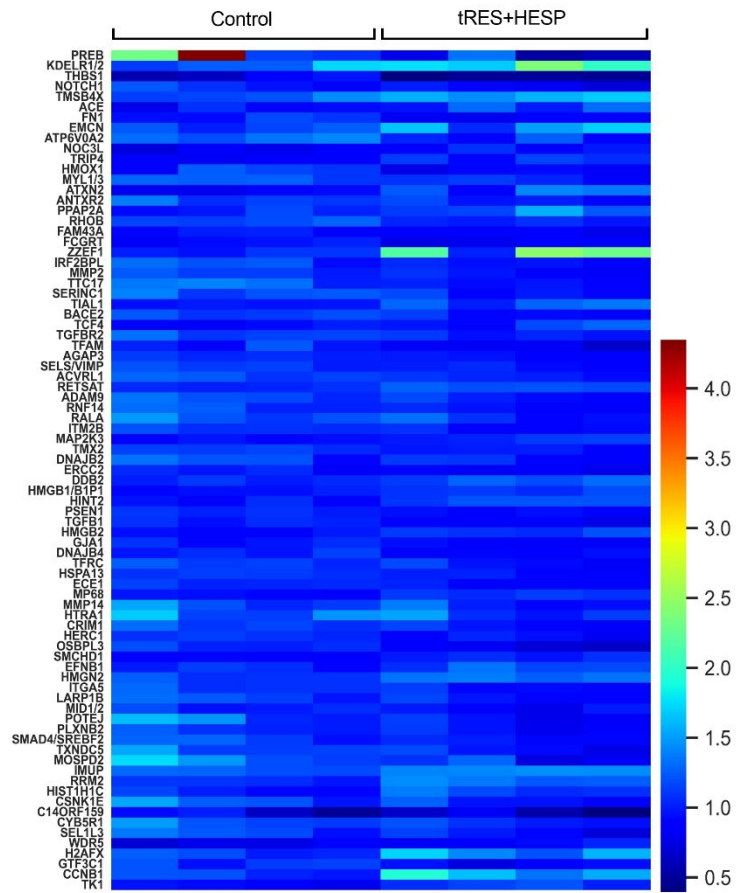

Supplemental Figure 2. Heatmap of 81 differentially expressed proteins and their abundance pattern in endothelial cells (ECs) from diabetic controls (n=4) vs. diabetic ECs with tRES+HESP treatment (n = 4).

Supplemental Table 1. The mean and medium for the coefficient of variation (CV) for the normalized protein ratio for each of the 3666 proteins for the 3 groups of samples (healthy controls, diabetic controls, and diabetic controls with tRES+HESP).

|        | Healthy controls | Diabetic controls | Diabetic tRES+HESP |
|--------|------------------|-------------------|--------------------|
| Mean   | 0.05             | 0.06              | 0.06               |
| Medium | 0.04             | 0.05              | 0.05               |

Supplemental Table 2. DAVID analysis for the 179 proteins with significant differences between healthy and diabetic ECs.

| DISEASE                                    | Count | PValue   | Genes                                                                                                                                                                                                                                                                                                                                                                                                                   |
|--------------------------------------------|-------|----------|-------------------------------------------------------------------------------------------------------------------------------------------------------------------------------------------------------------------------------------------------------------------------------------------------------------------------------------------------------------------------------------------------------------------------|
| Type 2 Diabetes   edema  <br>rosiglitazone | 35    | 0.004164 | ACVRL1, ITGB1, GRN, CD40, ITGB5, ITGB3, F11R, GPATCH8, LMNB1, ICAM1, ALCAM, LGALS1, TIMP2, ITGAV, MPDZ, LBR, CLASP1, ABCC1, ANXA2, SCAF4, TGFBR2, BACE2, P2RX4, FABP4, NPC1, REEP5, NPC2, TNFSF4, MYL3, PCCB, ZYX, PRKD2, CD44, MGLL, MYH6                                                                                                                                                                              |
| Stroke                                     | 11    | 0.030749 | DNAJC1, ATP6V1G1, REEP5, TRPC4, ITGB3, DTNBP1, RBMS1, TEK, PLCB1, CD44, ICAM1                                                                                                                                                                                                                                                                                                                                           |
| CARDIOVASCULAR                             | 57    | 0.006438 | ACVRL1, ITGB1, CD40, C2CD5, MAST4, ITGB3, FHL2, CLEC14A, SOGA1, GPATCH8, LMNB1, ICAM1, TIMP2, BCAP29, PIEZO1, SIRPA, ITGAV, ABCC1, TRPC5, TRPC4, ACTN1, VRK1, CMBL, MRPS6, RHOB, TGFBR2, BACE2, NPC1, RILPL1, MYL3, RBMS1, ADAM9, MYH6, MAD1L1, MGLL, MYH7, DCTN6, HSD17B12, RTN4, ARHGAP12, ATXN2, PRRC1, EPB41L3, APBB2, MPDZ, CLASP1, PLEKHA1, KLHL1, DTNBP1, LNPEP, WWP2, P2RX4, FABP4, REEP5, TNFSF4, SERINC1, TEK |
| PHARMACOGENOMIC                            | 40    | 0.007252 | ACVRL1, ITGB1, GRN, CD40, ITGB5, CD81, ITGB3, F11R, GPATCH8, LMNB1, ICAM1, ALCAM, LGALS1, TIMP2, ITGAV, MPDZ, LBR,                                                                                                                                                                                                                                                                                                      |

| Molecular function             | Count | P Value  | Genes                                                                                                                                                                                                                                                                                                                                                                                                    |
|--------------------------------|-------|----------|----------------------------------------------------------------------------------------------------------------------------------------------------------------------------------------------------------------------------------------------------------------------------------------------------------------------------------------------------------------------------------------------------------|
|                                |       |          | CLASP1, S100A10, ABCC1, ANXA2, DTNBP1, SCAF4, TGFBR2, SLC7A5, BACE2, P2RX4, FABP4, NPC1, REEP5, NPC2, TNFSF4, MYL3, PCCB, ZYX, PRKD2, TEK, CD44, MGLL, MYH6                                                                                                                                                                                                                                              |
| integrin binding               | 13    | 5.64E-08 | ITGB1, CD151, ITGB5, CD81, ITGB3, ACTN1, ICAM2, PRKCA, F11R, ICAM1, TIMP2, ADAM9, ITGAV                                                                                                                                                                                                                                                                                                                  |
| protein complex binding        | 25    | 1.76E-07 | ACVRL1, ITGB1, DCTN6, CD151, ITGB5, CD81, ITGB3, ICAM2, HSD17B12, F11R, ICAM1, TIMP2, ITGAV, CLASP1, ZNF185, ACTN1, HIP1R, PRKCA, SCAF4, TGFBR2, ADAM9, CD44, MYH6, MAD1L1, MYH7                                                                                                                                                                                                                         |
| cell adhesion molecule binding | 21    | 2.23E-07 | ITGB1, LRRC59, CD151, ITGB5, ANXA2, CD81, TRPC4, ITGB3, ACTN1, ICAM2, PRKCA, SCRIB, F11R, RTN4, ICAM1, ANLN, P2RX4, TIMP2, ADAM9, ITGAV, TAGLN2                                                                                                                                                                                                                                                          |
| protein binding                | 161   | 4.75E-06 | RAB3B, IPO11, POP1, CD81, ICAM2, F11R, ACTB, GPATCH8, ICAM1, HMGN4, LGALS1, ALCAM, BASP1, FTH1, DPF2, PIEZO1, SIRPA, H4C1, TNS2, ATP6V1G1, FNBP1, LIMCH1, COG5, ACTN1, UBE2E1, VRK1, DNAJB14, PRKCA, SCRIB, ATP1B3, GTPBP1, MYL3, SNRPG, ADAM9, JTB, PRKD2, TAGLN2, MAD1L1, LRRC59, CD151, NDUFB11, TEX264, TOR1AIP2, ARL2, NCAPG, PDS5B, PTTG1IP, RTN4, UBE2J1, STRIP1, BCL2L13, ATXN2, PRRC1, HNRNPDL, |



|                                |    |          |                                                                                                                                                                                                                                                                                                                                                                                                                                                                                                                                                                                                                                                                                                                                                                                            |
|--------------------------------|----|----------|--------------------------------------------------------------------------------------------------------------------------------------------------------------------------------------------------------------------------------------------------------------------------------------------------------------------------------------------------------------------------------------------------------------------------------------------------------------------------------------------------------------------------------------------------------------------------------------------------------------------------------------------------------------------------------------------------------------------------------------------------------------------------------------------|
|                                |    |          | BLOC1S1, AMDHD2, EPB41L3, ATP6V0A2, ZC3H18, MPDZ, ATP5ME, S100A10, ALYREF, LNPEP, DHCR24, HELZ, PRRC2B, DRAP1, ANLN, REEP5, TNFSF4, SERINC1, ANXA2P2, SERINC3, FIGS, ACVRL1, ITGB1, CD40, ITGB5, ITGB3, FHL1, FHL2, CLEC14A, USP39, DNPH1, LMNB1, BABAM1, PCM1, TRIM4, CSRP1, NTMT1, TNFAIP8L1, WDR5, TIMP2, FLOT1, RAC2, ITGAV, SDF2, LBR, BCAS2, HTATIP2, TRPC5, ADSL, RBM15, ANXA2, TRPC4, ABHD14B, RABGGTB, MRPS6, RHOB, TGFBR2, SLC7A5, BACE2, SFPQ, DNAJC1, NPC1, NPC2, RILPL1, PCCB, RBMS1, NCBP3, PLCB1, MYH6, MGLL, CD44, PFDN6, MYH7, DCTN6, GRN, HM13, DDX23, HSD17B12, MFF, PPM1F, LRRC8D, RBBP9, APBB2, CD59, CKB, PCNT, EXOSC2, PDLIM4, CLASP1, BCAP31, ZNF185, CMTM3, PLEKHA1, CNBP, KLHL1, HIP1R, DTNBP1, ERBIN, WWP2, ATP5F1E, SCAF4, FABP4, P2RX4, GID8, ZYX, PDCD4, TEK |
| macromolecular complex binding | 32 | 6.27E-06 | ACVRL1, ITGB1, DCTN6, CD151, ITGB5, CD81, ITGB3, ICAM2, HSD17B12, F11R, ACTB, ICAM1, HMGN4, TIMP2, ITGAV, CLASP1, ATP5ME, BCAP31, ZNF185, ACTN1, HIP1R, PRKCA, VRK1, SCAF4, TGFBR2, NEMF, SNRPG, ADAM9, CD44, MYH6, MAD1L1, MYH7                                                                                                                                                                                                                                                                                                                                                                                                                                                                                                                                                           |
| virus receptor activity        | 8  | 8.19E-06 | ITGB1, NPC1, ITGB5, CD81, ITGB3, ITGAV, F11R, ICAM1                                                                                                                                                                                                                                                                                                                                                                                                                                                                                                                                                                                                                                                                                                                                        |
| extracellular matrix binding   | 7  | 2.3E-05  | ITGB1, LGALS1, ANXA2, ITGB3, ADAM9, ITGAV, CLEC14A                                                                                                                                                                                                                                                                                                                                                                                                                                                                                                                                                                                                                                                                                                                                         |

|                                                       |     |          |                                                                                                                                                                                                                                                                                                                                                                                                                                                                                                                                                                                                                                                                                                                                                      |
|-------------------------------------------------------|-----|----------|------------------------------------------------------------------------------------------------------------------------------------------------------------------------------------------------------------------------------------------------------------------------------------------------------------------------------------------------------------------------------------------------------------------------------------------------------------------------------------------------------------------------------------------------------------------------------------------------------------------------------------------------------------------------------------------------------------------------------------------------------|
| enzyme binding                                        | 41  | 3.35E-05 | ACVRL1, ITGB1, IPO11, CD40, HM13, ITGB3, TOR1AIP2, RTN4, ACTB, UBE2J1, LMNB1, STRIP1, FLOT1, TIMP2, RAC2, ATP6V0A2, SIRPA, ITGAV, CKB, PDLIM4, TNS2, ATP6V1G1, TRPC5, ANXA2, PRKCA, VRK1, ATP1B3, DHCR24, RABGGTB, SCAF4, RHOB, TGFBR2, SFPQ, NPC2, JTB, ADAM9, PRKD2, SERINC1, ANXA2P2, PLCB1, MYH6                                                                                                                                                                                                                                                                                                                                                                                                                                                 |
| ATPase coupled ion transmembrane transporter activity | 7   | 0.000118 | ABCC1, ATP6V1G1, ATP6V0A2, ATP1B3, ATP5F1EP2, ATP5F1E, ATP5ME                                                                                                                                                                                                                                                                                                                                                                                                                                                                                                                                                                                                                                                                                        |
| binding                                               | 176 | 0.00031  | RAB3B, IPO11, POP1, CD81, DGKA, ICAM2, F11R, ACTB, GPATCH8, GIMAP8, ICAM1, HMGNA4, LGALS1, ALCAM, BASP1, FTH1, DPF2, PIEZO1, SIRPA, H4C1, TNS2, ATP6V1G1, FNBP1, LIMCH1, COG5, ACTN1, UBE2E1, VRK1, DNAJB14, PRKCA, SCRIB, ATP1B3, GTPBP1, MYL1, MYL3, SNRPG, ADAM9, JTB, PRKD2, TAGLN2, MAD1L1, LRRC59, CD151, NDUFB11, TEX264, TOR1AIP2, ARL2, NCAPG, PDS5B, PTTG1IP, RTN4, UBE2J1, STRIP1, BCL2L13, ATXN2, PRRC1, HNRNPDL, BLOC1S1, AMDHD2, EPB41L3, ATP6V0A2, ZC3H18, MPDZ, ATP5ME, S100A10, ALYREF, LNPEP, DHCR24, HELZ, PRRC2B, DRAP1, ANLN, REEP5, TNFSF4, SERINC1, ANXA2P2, SERINC3, PIGS, ACVRL1, ITGB1, C2CD5, CD40, ITGB5, MAST4, ITGB3, FHL1, FHL2, EFCAB14, CLEC14A, USP39, DNPH1, LMNB1, BABAM1, PCM1, TRIM4, CSRP1, NTMT1, TNFAIP8L1, |

|                                                                                  |    |          |                                                                                                                                                                                                                                                                                                                                                                                                                                                                                                                                                              |
|----------------------------------------------------------------------------------|----|----------|--------------------------------------------------------------------------------------------------------------------------------------------------------------------------------------------------------------------------------------------------------------------------------------------------------------------------------------------------------------------------------------------------------------------------------------------------------------------------------------------------------------------------------------------------------------|
|                                                                                  |    |          | WDR5, TIMP2, FLOT1, RAC2, ITGAV, MAN2C1, SDF2, LBR, BCAS2, HTATIP2, ABCC1, TRPC5, ADSL, RBM15, ANXA2, TRPC4, ABHD14B, RABGGTB, MRPS6, RHOB, TGFBR2, SLC7A5, BACE2, SFPQ, LSG1, DNAJC1, NPC1, NEMF, NPC2, RILPL1, PCCB, RBMS1, NCBP3, SNRPGP15, PLCB1, MYH6, RBMS2, MGLL, CD44, PFDN6, MYH7, DCTN6, GRN, MRPS35, HM13, DDX23, HSD17B12, MFF, PPM1F, EXOSC6, LRRC8D, RBBP9, APBB2, CD59, CKB, PCNT, EXOSC2, PDLIM4, CLASP1, BCAP31, ZNF185, CMTM3, PLEKHA1, CNBP, KLHL1, HIP1R, DTNBP1, ERBIN, WWP2, ATP5F1E, SCAF4, FABP4, P2RX4, GID8, ZYX, PDCD4, ESF1, TEK |
| RNA binding                                                                      | 36 | 0.000485 | LRRC59, GRN, MRPS35, POP1, DDX23, GPATCH8, RTN4, EXOSC6, ATXN2, LGALS1, HNRNPDL, CSRP1, ZC3H18, H4C1, LBR, EXOSC2, RBM15, ANXA2, CNBP, ALYREF, ACTN1, HELZ, MRPS6, GTPBP1, PRRC2B, SCAF4, SFPQ, NEMF, SNRPG, ZYX, PDCD4, RBMS1, ESF1, NCBP3, SNRPGP15, RBMS2                                                                                                                                                                                                                                                                                                 |
| ATPase activity, coupled to transmembrane movement of ions, rotational mechanism | 5  | 0.000513 | ATP6V1G1, ATP6V0A2, ATP5F1EP2, ATP5F1E, ATP5ME                                                                                                                                                                                                                                                                                                                                                                                                                                                                                                               |
| cation-transporting ATPase activity                                              | 6  | 0.000555 | ATP6V1G1, ATP6V0A2, ATP1B3, ATP5F1EP2, ATP5F1E, ATP5ME                                                                                                                                                                                                                                                                                                                                                                                                                                                                                                       |

|                                                                                                |    |          |                                                                                            |
|------------------------------------------------------------------------------------------------|----|----------|--------------------------------------------------------------------------------------------|
| hydrolase activity, acting on acid anhydrides, catalyzing transmembrane movement of substances | 7  | 0.001294 | ABCC1, ATP6V1G1, ATP6V0A2, ATP1B3, ATP5F1EP2, ATP5F1E, ATP5ME                              |
| ATPase activity, coupled to transmembrane movement of substances                               | 7  | 0.001294 | ABCC1, ATP6V1G1, ATP6V0A2, ATP1B3, ATP5F1EP2, ATP5F1E, ATP5ME                              |
| P-P-bond-hydrolysis-driven transmembrane transporter activity                                  | 7  | 0.001404 | ABCC1, ATP6V1G1, ATP6V0A2, ATP1B3, ATP5F1EP2, ATP5F1E, ATP5ME                              |
| primary active transmembrane transporter activity                                              | 7  | 0.001461 | ABCC1, ATP6V1G1, ATP6V0A2, ATP1B3, ATP5F1EP2, ATP5F1E, ATP5ME                              |
| actin binding                                                                                  | 13 | 0.001717 | ITGB1, TRPC5, ZNF185, LIMCH1, ACTN1, HIP1R, KLHL1, ANLN, EPB41L3, MYL3, PDLIM4, MYH6, MYH7 |
| ATPase activity, coupled to movement of substances                                             | 7  | 0.001776 | ABCC1, ATP6V1G1, ATP6V0A2, ATP1B3, ATP5F1EP2, ATP5F1E, ATP5ME                              |
| active ion transmembrane transporter activity                                                  | 7  | 0.002301 | ABCC1, ATP6V1G1, ATP6V0A2, ATP1B3, ATP5F1EP2, ATP5F1E, ATP5ME                              |
| protease binding                                                                               | 7  | 0.002385 | ITGB1, ANXA2, ITGB3, FLOT1, TIMP2, ITGAV, ANXA2P2                                          |

|                                                |    |          |                                                                                                                                                                          |
|------------------------------------------------|----|----------|--------------------------------------------------------------------------------------------------------------------------------------------------------------------------|
| cadherin binding                               | 10 | 0.004897 | ITGB1, LRRC59, ANLN, P2RX4, ANXA2, TRPC4, TAGLN2, SCRIB, F11R, RTN4                                                                                                      |
| ion transmembrane transporter activity         | 18 | 0.005035 | ABCC1, ATP6V1G1, TRPC5, ANXA2, TRPC4, SLC38A10, ATP1B3, ATP5F1E, SLC7A5, P2RX4, ATP6V0A2, LRRC8D, PIEZO1, ITGAV, ANXA2P2, SERINC3, ATP5F1EP2, ATP5ME                     |
| cation transmembrane transporter activity      | 15 | 0.005055 | ATP6V1G1, TRPC5, ANXA2, TRPC4, ATP1B3, ATP5F1E, SLC7A5, P2RX4, ATP6V0A2, PIEZO1, ITGAV, ANXA2P2, SERINC3, ATP5F1EP2, ATP5ME                                              |
| calcium channel activity                       | 6  | 0.006177 | TRPC5, P2RX4, ANXA2, TRPC4, ITGAV, ANXA2P2                                                                                                                               |
| substrate-specific transporter activity        | 21 | 0.006391 | ABCC1, ATP6V1G1, TRPC5, IPO11, ANXA2, TRPC4, SLC38A10, ATP1B3, ATP5F1E, SLC7A5, P2RX4, FABP4, NPC1, ATP6V0A2, LRRC8D, PIEZO1, ITGAV, ANXA2P2, SERINC3, ATP5F1EP2, ATP5ME |
| nucleoside-triphosphatase activity             | 18 | 0.006951 | RAB3B, ABCC1, ATP6V1G1, DDX23, ARL2, ATP1B3, HELZ, GTPBP1, ATP5F1E, RHOB, LSG1, MYL3, RAC2, ATP6V0A2, ATP5F1EP2, MYH6, ATP5ME, MYH7                                      |
| calcium ion transmembrane transporter activity | 6  | 0.010281 | TRPC5, P2RX4, ANXA2, TRPC4, ITGAV, ANXA2P2                                                                                                                               |

|                                                       |    |          |                                                                                                                                                      |
|-------------------------------------------------------|----|----------|------------------------------------------------------------------------------------------------------------------------------------------------------|
| cytoskeletal protein binding                          | 19 | 0.010763 | ITGB1, RAB3B, TRPC5, ZNF185, ANXA2, LIMCH1, ACTN1, HIP1R, KLHL1, ACTB, ANLN, CSRP1, EPB41L3, MYL3, ANXA2P2, PDLIM4, CLASP1, MYH6, MYH7               |
| alcohol binding                                       | 5  | 0.010944 | TRPC5, NPC1, NPC2, TRPC4, CD81                                                                                                                       |
| protein kinase binding                                | 15 | 0.011115 | ITGB1, ACVRL1, ITGB3, VRK1, ACTB, RHOB, TGFBR2, STRIP1, RAC2, ADAM9, JTB, SIRPA, ITGAV, PRKD2, MYH6                                                  |
| substrate-specific transmembrane transporter activity | 18 | 0.011212 | ABCC1, ATP6V1G1, TRPC5, ANXA2, TRPC4, SLC38A10, ATP1B3, ATP5F1E, SLC7A5, P2RX4, ATP6V0A2, LRRC8D, PIEZO1, ITGAV, ANXA2P2, SERINC3, ATP5F1EP2, ATP5ME |
| ATPase binding                                        | 5  | 0.012234 | TRPC5, ATP6V1G1, ATP6V0A2, TOR1AIP2, ATP1B3                                                                                                          |
| pyrophosphatase activity                              | 18 | 0.012433 | RAB3B, ABCC1, ATP6V1G1, DDX23, ARL2, ATP1B3, HELZ, GTPBP1, ATP5F1E, RHOB, LSG1, MYL3, RAC2, ATP6V0A2, ATP5F1EP2, MYH6, ATP5ME, MYH7                  |
| hydrolase activity, acting on acid anhydrides         | 18 | 0.012666 | RAB3B, ABCC1, ATP6V1G1, DDX23, ARL2, ATP1B3, HELZ, GTPBP1, ATP5F1E, RHOB, LSG1, MYL3, RAC2, ATP6V0A2, ATP5F1EP2, MYH6, ATP5ME, MYH7                  |
| hydrolase activity, acting on acid anhydrides, in     | 18 | 0.012666 | RAB3B, ABCC1, ATP6V1G1, DDX23, ARL2, ATP1B3, HELZ, GTPBP1, ATP5F1E, RHOB, LSG1, MYL3, RAC2, ATP6V0A2, ATP5F1EP2, MYH6, ATP5ME, MYH7                  |

|                                                     |    |          |                                                                                                                                                                                                                                                                                      |
|-----------------------------------------------------|----|----------|--------------------------------------------------------------------------------------------------------------------------------------------------------------------------------------------------------------------------------------------------------------------------------------|
| phosphorus-containing anhydrides                    |    |          |                                                                                                                                                                                                                                                                                      |
| kinase binding                                      | 16 | 0.012806 | ITGB1, ACVRL1, ITGB3, VRK1, ACTB, RHOB, TGFBR2, STRIP1, RAC2, ADAM9, JTB, SIRPA, ITGAV, PRKD2, TNS2, MYH6                                                                                                                                                                            |
| inorganic cation transmembrane transporter activity | 12 | 0.015629 | TRPC5, ATP6V1G1, P2RX4, ANXA2, TRPC4, ATP6V0A2, ATP1B3, ITGAV, ANXA2P2, ATP5F1EP2, ATP5F1E, ATP5ME                                                                                                                                                                                   |
| transporter activity                                | 21 | 0.021286 | ABCC1, ATP6V1G1, TRPC5, IPO11, ANXA2, TRPC4, SLC38A10, ATP1B3, ATP5F1E, SLC7A5, P2RX4, FABP4, NPC1, ATP6V0A2, LRRC8D, PIEZO1, ITGAV, ANXA2P2, SERINC3, ATP5F1EP2, ATP5ME                                                                                                             |
| hydrogen ion transmembrane transporter activity     | 5  | 0.022007 | ATP6V1G1, ATP6V0A2, ATP5F1EP2, ATP5F1E, ATP5ME                                                                                                                                                                                                                                       |
| anion binding                                       | 40 | 0.023063 | ACVRL1, RAB3B, C2CD5, MAST4, DGKA, DDX23, ARL2, HSD17B12, GIMAP8, ACTB, UBE2J1, RAC2, CKB, LBR, CLASP1, ABCC1, TRPC5, PLEKHA1, ANXA2, TRPC4, HIP1R, UBE2E1, PRKCA, HELZ, VRK1, DHCR24, GTPBP1, SCAF4, RHOB, TGFBR2, LSG1, P2RX4, FABP4, PCCB, PRKD2, TEK, ANXA2P2, PLCB1, MYH6, MYH7 |
| small molecule binding                              | 36 | 0.024806 | ACVRL1, RAB3B, MAST4, CD81, DGKA, DDX23, ARL2, GIMAP8, ACTB, UBE2J1, RAC2, CKB, LBR, CLASP1, ABCC1, TRPC5, TRPC4,                                                                                                                                                                    |

|                                                              |    |          |                                                                                                                                                                                    |
|--------------------------------------------------------------|----|----------|------------------------------------------------------------------------------------------------------------------------------------------------------------------------------------|
|                                                              |    |          | UBE2E1, PRKCA, HELZ, VRK1, DHCR24, GTPBP1, SCAF4, RHOB, TGFB2, LSG1, P2RX4, FABP4, NPC1, NPC2, PCCB, PRKD2, TEK, MYH6, MYH7                                                        |
| phosphatidylinositol bisphosphate binding                    | 5  | 0.029031 | PLEKHA1, ANXA2, HIP1R, ANXA2P2, PLCB1                                                                                                                                              |
| divalent inorganic cation transmembrane transporter activity | 6  | 0.031456 | TRPC5, P2RX4, ANXA2, TRPC4, ITGAV, ANXA2P2                                                                                                                                         |
| ATPase activity, coupled                                     | 7  | 0.033435 | ABCC1, ATP6V1G1, ATP6V0A2, ATP1B3, ATP5F1EP2, ATP5F1E, ATP5ME                                                                                                                      |
| transmembrane transporter activity                           | 18 | 0.034437 | ABCC1, ATP6V1G1, TRPC5, ANXA2, TRPC4, SLC38A10, ATP1B3, ATP5F1E, SLC7A5, P2RX4, ATP6V0A2, LRRC8D, PIEZO1, ITGAV, ANXA2P2, SERINC3, ATP5F1EP2, ATP5ME                               |
| purine ribonucleoside triphosphate binding                   | 27 | 0.03964  | ACVRL1, RAB3B, MAST4, DGKA, DDX23, ARL2, GIMAP8, ACTB, UBE2J1, RAC2, CKB, CLASP1, ABCC1, UBE2E1, PRKCA, HELZ, VRK1, GTPBP1, RHOB, TGFB2, LSG1, P2RX4, PCCB, PRKD2, TEK, MYH6, MYH7 |
| hydrolase activity                                           | 36 | 0.039654 | RAB3B, POP1, HM13, DDX23, ARL2, USP39, DNPH1, PPM1F, AMDHD2, RAC2, ATP6V0A2, RBBP9, MAN2C1, ATP5F1EP2, EXOSC2, TNS2, ATP5ME, ABCC1, ATP6V1G1, ABHD14B, HELZ,                       |



|                                      |              |               |                                                                                                                                                                                                                                                                                  |
|--------------------------------------|--------------|---------------|----------------------------------------------------------------------------------------------------------------------------------------------------------------------------------------------------------------------------------------------------------------------------------|
|                                      |              |               | MOGS, ATP1B3, LNPEP, CMBL, GTPBP1, ATP5F1E, RHOB, BACE2, LSG1, MYL3, ADAM9, PLCB1, MGLL, MYH6, MYH7                                                                                                                                                                              |
| identical protein binding            | 30           | 0.041909      | HM13, ITGB3, FHL2, F11R, MFF, DNPH1, RTN4, ACTB, PCM1, ALCAM, LGALS1, TRIM4, FTH1, TNFAIP8L1, PDLIM4, TNS2, S100A10, ADSL, ANXA2, FNBP1, ACTN1, HIP1R, DRAP1, SFPQ, P2RX4, GID8, TEK, PLCB1, MGLL, MAD1L1                                                                        |
| growth factor binding                | 5            | 0.049447      | ACVRL1, ITGB3, ITGAV, TEK, TGFBR2                                                                                                                                                                                                                                                |
| <b>Biological process</b>            | <b>Count</b> | <b>PValue</b> | <b>Genes</b>                                                                                                                                                                                                                                                                     |
| positive regulation of cell adhesion | 21           | 4.81E-08      | CD81, ITGB3, ARL2, PRKCA, HSD17B12, F11R, PPM1F, ACTB, TGFBR2, ICAM1, LGALS1, TNFSF4, FLOT1, ADAM9, PIEZO1, SIRPA, ITGAV, PRKD2, TEK, CD44, S100A10                                                                                                                              |
| cell adhesion                        | 39           | 6.42E-08      | ACVRL1, ITGB1, CD151, ITGB5, CD81, ITGB3, ICAM2, ARL2, HSD17B12, F11R, PPM1F, ACTB, ICAM1, ALCAM, LGALS1, CSRP1, FLOT1, RAC2, SIRPA, PIEZO1, ITGAV, CLASP1, S100A10, ANXA2, LIMCH1, MCAM, ACTN1, ERBIN, PRKCA, SCRIB, RHOB, TGFBR2, TNFSF4, ZYX, ADAM9, PRKD2, TEK, CD44, MAD1L1 |
| biological adhesion                  | 39           | 7.2E-08       | ACVRL1, ITGB1, CD151, ITGB5, CD81, ITGB3, ICAM2, ARL2, HSD17B12, F11R, PPM1F, ACTB, ICAM1, ALCAM, LGALS1, CSRP1, FLOT1, RAC2, SIRPA, PIEZO1, ITGAV, CLASP1, S100A10, ANXA2,                                                                                                      |

|                                                  |     |          |                                                                                                                                                                                                                              |
|--------------------------------------------------|-----|----------|------------------------------------------------------------------------------------------------------------------------------------------------------------------------------------------------------------------------------|
|                                                  |     |          | LIMCH1, MCAM, ACTN1, ERBIN, PRKCA, SCRIB, RHOB, TGFBR2, TNFSF4, ZYX, ADAM9, PRKD2, TEK, CD44, MAD1L1                                                                                                                         |
| actin cytoskeleton organization                  | 25  | 8.53E-08 | ITGB1, ITGB5, F11R, PPM1F, ACTB, ICAM1, ARHGAP12, STRIP1, CSR1P1, EPB41L3, RAC2, PDLIM4, CLASP1, S100A10, LIMCH1, ACTN1, HIP1R, KLHL1, DTNBP1, RHOB, ANLN, ZYX, TEK, MYH6, MYH7                                              |
| actin filament-based process                     | 27  | 9.29E-08 | ITGB1, ITGB5, ITGB3, F11R, PPM1F, ACTB, ICAM1, ARHGAP12, STRIP1, CSR1P1, EPB41L3, RAC2, PDLIM4, CLASP1, S100A10, LIMCH1, ACTN1, HIP1R, KLHL1, DTNBP1, RHOB, ANLN, MYL1, ZYX, TEK, MYH6, MYH7                                 |
| regulation of cell adhesion                      | 27  | 1.23E-07 | ACVRL1, CD81, ITGB3, ARL2, HSD17B12, F11R, PPM1F, ACTB, ICAM1, LGALS1, FLOT1, RAC2, SIRPA, PIEZO1, ITGAV, CLASP1, S100A10, LIMCH1, PRKCA, SCRIB, TGFBR2, TNFSF4, ADAM9, PRKD2, TEK, CD44, MAD1L1                             |
| positive regulation of epithelial cell migration | 13  | 1.57E-07 | GRN, CD40, ITGB3, PRKCA, PPM1F, RTN4, RHOB, TGFBR2, P2RX4, ADAM9, PRKD2, TEK, CLASP1                                                                                                                                         |
| cellular component organization or biogenesis    | 102 | 1.89E-07 | RAB3B, CD81, F11R, ACTB, ICAM1, HMGN4, LGALS1, ALCAM, DPF2, PIEZO1, SIRPA, H4C1, LIMCH1, COG5, ACTN1, UBE2E1, VRK1, DNAJB14, PRKCA, SCRIB, ATP1B3, SNRPG, ADAM9, JTB, PRKD2, MAD1L1, CD151, NDUFB11, TEX264, TOR1AIP2, ARL2, |

|                                   |    |          |                                                                                                                                                                                                                                                                                                                                                                                                                                                                                                                     |
|-----------------------------------|----|----------|---------------------------------------------------------------------------------------------------------------------------------------------------------------------------------------------------------------------------------------------------------------------------------------------------------------------------------------------------------------------------------------------------------------------------------------------------------------------------------------------------------------------|
|                                   |    |          | NCAPG, PDS5B, RTN4, ARHGAP12, STRIP1, ATXN2, BLOC1S1, EPB41L3, MPDZ, S100A10, DHCR24, ANLN, REEP5, SERINC1, ACVRL1, ITGB1, C2CD5, CD40, ITGB5, MAST4, ITGB3, FHL1, USP39, DNP1, LMNB1, BABAM1, PCM1, CSRP1, NTMT1, WDR5, FLOT1, RAC2, ITGAV, ABCC1, TRPC5, ANXA2, RHOB, SFPQ, LSG1, NPC1, NEMF, RILPL1, SNRPGP15, PLCB1, MYH6, CD44, PFDN6, MYH7, DCTN6, GRN, DDX23, HSD17B12, MFF, PPM1F, EXOSC6, LRRC8D, APBB2, PCNT, EXOSC2, PDLIM4, CLASP1, BCAP31, PLEKHA1, KLHL1, HIP1R, DTNBP1, ERBIN, SCAF4, ZYX, ESF1, TEK |
| response to wounding              | 23 | 2.82E-07 | ITGB1, ACVRL1, GRN, CD40, CD151, ANXA2, CD81, MCAM, DGKA, ITGB3, DTNBP1, PRKCA, SCRIB, F11R, ACTB, TGFBR2, P2RX4, LGALS1, CSRP1, CD59, CD44, CLASP1, S100A10                                                                                                                                                                                                                                                                                                                                                        |
| actomyosin structure organization | 13 | 4.12E-07 | ITGB1, ITGB5, LIMCH1, F11R, PPM1F, ANLN, CSRP1, EPB41L3, ZYX, CLASP1, MYH6, S100A10, MYH7                                                                                                                                                                                                                                                                                                                                                                                                                           |
| cell-matrix adhesion              | 14 | 4.59E-07 | ITGB1, ACVRL1, ITGB5, LIMCH1, ITGB3, ACTN1, PPM1F, ZYX, ADAM9, ITGAV, TEK, CD44, CLASP1, S100A10                                                                                                                                                                                                                                                                                                                                                                                                                    |
| wound healing                     | 20 | 4.96E-07 | ITGB1, ACVRL1, CD40, CD151, ANXA2, CD81, MCAM, DGKA, ITGB3, DTNBP1, PRKCA, SCRIB, F11R, ACTB, TGFBR2, CSRP1, CD59, CD44, CLASP1, S100A10                                                                                                                                                                                                                                                                                                                                                                            |

|                                 |    |          |                                                                                                                                                                        |
|---------------------------------|----|----------|------------------------------------------------------------------------------------------------------------------------------------------------------------------------|
| epithelial cell migration       | 17 | 5.02E-07 | ITGB1, ACVRL1, GRN, CD40, ITGB3, PRKCA, CLEC14A, PPM1F, RTN4, RHOB, TGFBR2, ANLN, P2RX4, ADAM9, PRKD2, TEK, CLASP1                                                     |
| epithelium migration            | 17 | 5.6E-07  | ITGB1, ACVRL1, GRN, CD40, ITGB3, PRKCA, CLEC14A, PPM1F, RTN4, RHOB, TGFBR2, ANLN, P2RX4, ADAM9, PRKD2, TEK, CLASP1                                                     |
| single organism cell adhesion   | 24 | 5.93E-07 | ITGB1, ITGB5, CD81, ITGB3, PRKCA, SCRIB, F11R, PPM1F, ACTB, TGFBR2, ICAM1, LGALS1, CSRP1, TNFSF4, FLOT1, RAC2, ADAM9, PIEZO1, SIRPA, ITGAV, TEK, CD44, MAD1L1, S100A10 |
| cell-substrate adhesion         | 17 | 6.2E-07  | ITGB1, ACVRL1, ITGB5, LIMCH1, ITGB3, ACTN1, ARL2, HSD17B12, PPM1F, LGALS1, ZYX, ADAM9, ITGAV, TEK, CD44, CLASP1, S100A10                                               |
| tissue migration                | 17 | 6.88E-07 | ITGB1, ACVRL1, GRN, CD40, ITGB3, PRKCA, CLEC14A, PPM1F, RTN4, RHOB, TGFBR2, ANLN, P2RX4, ADAM9, PRKD2, TEK, CLASP1                                                     |
| cell junction assembly          | 14 | 8.36E-07 | ACVRL1, LIMCH1, ITGB3, ACTN1, ARL2, PRKCA, F11R, PPM1F, ACTB, EPB41L3, FLOT1, TEK, CLASP1, S100A10                                                                     |
| cellular component organization | 98 | 9.36E-07 | RAB3B, CD81, F11R, ACTB, ICAM1, HMGN4, LGALS1, ALCAM, DPF2, PIEZO1, SIRPA, H4C1, LIMCH1, COG5, ACTN1, UBE2E1, VRK1, DNAJB14, PRKCA, SCRIB, ATP1B3, SNRPG, ADAM9, JTB,  |

|              |    |          |                                                                                                                                                                                                                                                                                                                                                                                                                                                                                                                                                                                                                                                    |
|--------------|----|----------|----------------------------------------------------------------------------------------------------------------------------------------------------------------------------------------------------------------------------------------------------------------------------------------------------------------------------------------------------------------------------------------------------------------------------------------------------------------------------------------------------------------------------------------------------------------------------------------------------------------------------------------------------|
|              |    |          | <p>PRKD2, MAD1L1, CD151, NDUFB11, TEX264, TOR1AIP2, ARL2, NCAPG, PDS5B, RTN4, ARHGAP12, STRIP1, ATXN2, BLOC1S1, EPB41L3, MPDZ, S100A10, DHCR24, ANLN, REEP5, ACVRL1, ITGB1, C2CD5, CD40, ITGB5, MAST4, ITGB3, FHL1, USP39, DNPH1, LMNB1, BABAM1, PCM1, CSRP1, NTMT1, WDR5, FLOT1, RAC2, ITGAV, ABCC1, TRPC5, ANXA2, RHOB, SFPQ, NPC1, NEMF, RILPL1, SNRPGP15, PLCB1, MYH6, CD44, PFDN6, MYH7, DCTN6, GRN, DDX23, HSD17B12, MFF, PPM1F, LRRC8D, APBB2, PCNT, EXOSC2, PDLIM4, CLASP1, BCAP31, PLEKHA1, KLHL1, HIP1R, DTNBP1, ERBIN, SCAF4, ZYX, TEK</p>                                                                                              |
| localization | 95 | 1.03E-06 | <p>ACVRL1, ITGB1, RAB3B, CD40, C2CD5, IPO11, ITGB5, CD81, ITGB3, FHL1, CLEC14A, F11R, ACTB, LMNB1, ICAM1, PCM1, ODR4, FTH1, FLOT1, RAC2, BCAP29, PIEZO1, SIRPA, ITGAV, H4C1, ATP5F1EP2, HTATIP2, ABCC1, TRPC5, ATP6V1G1, ANXA2, FNBP1, TRPC4, LIMCH1, COG5, ACTN1, PRKCA, SCRIB, ATP1B3, RHOB, TGFB2, SLC7A5, SFPQ, LSG1, DNAJC1, NPC1, NEMF, NPC2, RILPL1, ADAM9, PRKD2, NCBP3, PLCB1, MAD1L1, CD44, GRN, CD151, NDUFB11, HM13, TOR1AIP2, ARL2, SLC38A10, PTTG1IP, MFF, PPM1F, RTN4, UBE2J1, ARHGAP12, ATXN2, BLOC1S1, EPB41L3, ATP6V0A2, LRRC8D, PCNT, EXOSC2, CLASP1, ATP5ME, S100A10, BCAP31, PLEKHA1, MCAM, ALYREF, HIP1R, DTNBP1, ERBIN,</p> |

|                                 |                         |     |                                                                         |                                                                                                                                                                                                                                                                                                                                                                                                    |
|---------------------------------|-------------------------|-----|-------------------------------------------------------------------------|----------------------------------------------------------------------------------------------------------------------------------------------------------------------------------------------------------------------------------------------------------------------------------------------------------------------------------------------------------------------------------------------------|
|                                 |                         |     | WWP2, DHCR24, ATP5F1E, ANLN, P2RX4, FABP4, REEP5, ANXA2P2, TEK, SERINC3 |                                                                                                                                                                                                                                                                                                                                                                                                    |
| single-organism<br>organization | organelle               | 41  | 1.18E-06                                                                | ITGB1, C2CD5, ITGB5, TEX264, ARL2, NCAPG, PDS5B, F11R, MFF, PPM1F, RTN4, ACTB, ICAM1, ARHGAP12, STRIP1, PCM1, CSRP1, EPB41L3, DPF2, RAC2, PCNT, PDLIM4, CLASP1, S100A10, ANXA2, LIMCH1, ACTN1, HIP1R, KLHL1, DTNBP1, ERBIN, VRK1, RHOB, ANLN, SFPQ, RILPL1, ZYX, TEK, MYH6, MAD1L1, MYH7                                                                                                           |
| single<br>adhesion              | organismal<br>cell-cell | 22  | 1.28E-06                                                                | ITGB1, ITGB5, CD81, ITGB3, PRKCA, SCRIB, F11R, PPM1F, ACTB, TGFBR2, ICAM1, LGALS1, CSRP1, TNFSF4, FLOT1, RAC2, ADAM9, PIEZO1, SIRPA, ITGAV, CD44, MAD1L1                                                                                                                                                                                                                                           |
| endomembrane<br>organization    | system                  | 24  | 1.61E-06                                                                | ITGB1, RAB3B, C2CD5, TRPC5, ANXA2, COG5, CD81, DTNBP1, TOR1AIP2, ATP1B3, PRKCA, VRK1, SCRIB, F11R, RTN4, ACTB, LMNB1, REEP5, BLOC1S1, RILPL1, EPB41L3, FLOT1, CLASP1, S100A10                                                                                                                                                                                                                      |
| single-organism<br>process      | cellular                | 142 | 3.77E-06                                                                | RAB3B, CD81, DGKA, F11R, ACTB, GIMAP8, ICAM1, LGALS1, ALCAM, BASP1, FTH1, DPF2, PIEZO1, SIRPA, BCAP29, H4C1, TNS2, ATP6V1G1, LIMCH1, ACTN1, VRK1, DNAJB14, MOGS, PRKCA, SCRIB, ATP1B3, GTPBP1, MYL1, ADAM9, JTB, PRKD2, TAGLN2, MAD1L1, CD151, NDUFB11, TEX264, TOR1AIP2, ARL2, NCAPG, PDS5B, PTTG1IP, RTN4, UBE2J1, ARHGAP12, STRIP1, BCL2L13, ATXN2, BLOC1S1, AMDHD2, EPB41L3, ATP6V0A2, ATP5ME, |

|                                         |    |          |                                                                                                                                                                                                                                                                                                                                                                                                                                                                                                                                                                                                                                                              |
|-----------------------------------------|----|----------|--------------------------------------------------------------------------------------------------------------------------------------------------------------------------------------------------------------------------------------------------------------------------------------------------------------------------------------------------------------------------------------------------------------------------------------------------------------------------------------------------------------------------------------------------------------------------------------------------------------------------------------------------------------|
|                                         |    |          | S100A10, MCAM, ALYREF, LNPEP, DHCR24, HELZ, PRRC2B, ANLN, REEP5, TNFSF4, SERINC1, SERINC3, PIGS, ACVRL1, ITGB1, C2CD5, CD40, ITGB5, ITGB3, FHL1, FHL2, CLEC14A, USP39, DNP1, LMNB1, BABAM1, PCM1, CSRP1, NTMT1, TNFAIP8L1, WDR5, TIMP2, FLOT1, RAC2, ITGAV, ATP5F1EP2, LBR, HTATIP2, ABCC1, TRPC5, ADSL, RBM15, ANXA2, TRPC4, ABHD14B, RHOB, TGFBR2, SLC7A5, BACE2, SFPQ, DNAJC1, NPC1, RILPL1, PCCB, PLCB1, MYH6, MGLL, CD44, PFDN6, MYH7, DCTN6, GRN, HM13, HSD17B12, MFF, PPM1F, EXOSC6, LRRC8D, RBBP9, APBB2, CKB, PCNT, EXOSC2, PDLIM4, CLASP1, BCAP31, PLEKHA1, KLHL1, HIP1R, DTNBP1, ERBIN, WWP2, ATP5F1E, SCAF4, FABP4, P2RX4, GID8, ZYX, PDCD4, TEK |
| cytoskeleton organization               | 34 | 4.56E-06 | ITGB1, DCTN6, MAST4, ITGB5, ITGB3, ARL2, F11R, PPM1F, ACTB, ICAM1, ARHGAP12, STRIP1, PCM1, CSRP1, NTMT1, EPB41L3, RAC2, PCNT, MPDZ, PDLIM4, CLASP1, S100A10, LIMCH1, ACTN1, HIP1R, KLHL1, DTNBP1, ERBIN, RHOB, ANLN, ZYX, TEK, MYH6, MYH7                                                                                                                                                                                                                                                                                                                                                                                                                    |
| regulation of epithelial cell migration | 14 | 5.29E-06 | ACVRL1, GRN, CD40, ITGB3, PRKCA, PPM1F, RTN4, RHOB, TGFBR2, P2RX4, ADAM9, PRKD2, TEK, CLASP1                                                                                                                                                                                                                                                                                                                                                                                                                                                                                                                                                                 |
| cell junction organization              | 14 | 5.29E-06 | ACVRL1, LIMCH1, ITGB3, ACTN1, ARL2, PRKCA, F11R, PPM1F, ACTB, EPB41L3, FLOT1, TEK, CLASP1, S100A10                                                                                                                                                                                                                                                                                                                                                                                                                                                                                                                                                           |

|                                                                     |    |          |                                                                                                                                                                                                                                                                                                         |
|---------------------------------------------------------------------|----|----------|---------------------------------------------------------------------------------------------------------------------------------------------------------------------------------------------------------------------------------------------------------------------------------------------------------|
| viral entry into host cell                                          | 10 | 7.57E-06 | ITGB1, LGALS1, NPC1, ITGB5, CD81, ITGB3, WWP2, ITGAV, F11R, ICAM1                                                                                                                                                                                                                                       |
| single-organism membrane organization                               | 24 | 7.91E-06 | ITGB1, RAB3B, ABCC1, C2CD5, TRPC5, ANXA2, CD81, HIP1R, TOR1AIP2, ATP1B3, PRKCA, VRK1, SCRIB, F11R, MFF, RTN4, ACTB, LMNB1, NPC1, REEP5, RILPL1, EPB41L3, FLOT1, S100A10                                                                                                                                 |
| entry into host cell                                                | 10 | 8.99E-06 | ITGB1, LGALS1, NPC1, ITGB5, CD81, ITGB3, WWP2, ITGAV, F11R, ICAM1                                                                                                                                                                                                                                       |
| entry into host                                                     | 10 | 8.99E-06 | ITGB1, LGALS1, NPC1, ITGB5, CD81, ITGB3, WWP2, ITGAV, F11R, ICAM1                                                                                                                                                                                                                                       |
| entry into cell of other organism involved in symbiotic interaction | 10 | 8.99E-06 | ITGB1, LGALS1, NPC1, ITGB5, CD81, ITGB3, WWP2, ITGAV, F11R, ICAM1                                                                                                                                                                                                                                       |
| entry into other organism involved in symbiotic interaction         | 10 | 9.5E-06  | ITGB1, LGALS1, NPC1, ITGB5, CD81, ITGB3, WWP2, ITGAV, F11R, ICAM1                                                                                                                                                                                                                                       |
| macromolecule localization                                          | 53 | 1.08E-05 | ITGB1, RAB3B, C2CD5, IPO11, CD81, ITGB3, F11R, ACTB, LMNB1, PCM1, ODR4, FLOT1, RAC2, BCAP29, ITGAV, H4C1, ABCC1, ANXA2, COG5, SCRIB, ATP1B3, RHOB, TGFBR2, SFPQ, LSG1, DNAJC1, NPC1, NPC2, RILPL1, ADAM9, NCBP3, MAD1L1, HM13, TOR1AIP2, ARL2, PTTG1IP, MFF, PPM1F, RTN4, UBE2J1, ATXN2, EPB41L3, PCNT, |



|                                       |    |          |                                                                                                                                                                                                                                                                                                                                                                                                                                                                                                                                                                 |
|---------------------------------------|----|----------|-----------------------------------------------------------------------------------------------------------------------------------------------------------------------------------------------------------------------------------------------------------------------------------------------------------------------------------------------------------------------------------------------------------------------------------------------------------------------------------------------------------------------------------------------------------------|
|                                       |    |          | EXOSC2, S100A10, BCAP31, PLEKHA1, ALYREF, ERBIN, WWP2, DHCR24, P2RX4, FABP4                                                                                                                                                                                                                                                                                                                                                                                                                                                                                     |
| establishment of localization         | 74 | 1.28E-05 | ITGB1, RAB3B, C2CD5, IPO11, CD81, ITGB3, FHL1, F11R, ACTB, LMNB1, ICAM1, PCM1, FTH1, FLOT1, RAC2, BCAP29, PIEZO1, SIRPA, ITGAV, ATP5F1EP2, HTATIP2, ABCC1, TRPC5, ATP6V1G1, ANXA2, FNBP1, TRPC4, COG5, SCRIB, ATP1B3, RHOB, TGFB2, SLC7A5, SFPQ, LSG1, DNAJC1, NPC1, NEMF, NPC2, RILPL1, ADAM9, NCBP3, MAD1L1, GRN, CD151, NDUFB11, HM13, SLC38A10, PTTG1IP, MFF, PPM1F, UBE2J1, ARHGAP12, ATXN2, BLOC1S1, ATP6V0A2, LRRC8D, PCNT, CLASP1, ATP5ME, S100A10, BCAP31, PLEKHA1, ALYREF, HIP1R, DTNBP1, ERBIN, WWP2, ATP5F1E, P2RX4, FABP4, REEP5, ANXA2P2, SERINC3 |
| positive regulation of cell migration | 19 | 1.29E-05 | ITGB1, GRN, CD40, CD151, MCAM, ITGB3, PRKCA, PPM1F, RTN4, RHOB, TGFB2, ICAM1, P2RX4, RAC2, ADAM9, ITGAV, PRKD2, TEK, CLASP1                                                                                                                                                                                                                                                                                                                                                                                                                                     |
| regulation of response to stress      | 35 | 1.42E-05 | ITGB1, GRN, CD40, CD81, PTTG1IP, F11R, RTN4, ACTB, UBE2J1, BABAM1, LGALS1, DPF2, FLOT1, SIRPA, CD59, CLASP1, S100A10, BCAP31, ABCC1, ANXA2, DTNBP1, ERBIN, PRKCA, SCRIB, TGFB2, SFPQ, FABP4, TNFSF4, ZYX, PDCD4, TEK, PLCB1, SERINC3, CD44, MGLL                                                                                                                                                                                                                                                                                                                |

|                                                          |    |          |                                                                                                                                                                                                                                                                                                                                                                                         |
|----------------------------------------------------------|----|----------|-----------------------------------------------------------------------------------------------------------------------------------------------------------------------------------------------------------------------------------------------------------------------------------------------------------------------------------------------------------------------------------------|
| membrane organization                                    | 27 | 1.48E-05 | ITGB1, RAB3B, C2CD5, CD81, TOR1AIP2, F11R, MFF, RTN4, ACTB, LMNB1, ARHGAP12, EPB41L3, FLOT1, RAC2, S100A10, ABCC1, TRPC5, ANXA2, HIP1R, PRKCA, VRK1, SCRIB, ATP1B3, DHCR24, NPC1, REEP5, RILPL1                                                                                                                                                                                         |
| ameboidal-type cell migration                            | 17 | 1.61E-05 | ITGB1, ACVRL1, GRN, CD40, ITGB3, PRKCA, CLEC14A, PPM1F, RTN4, RHOB, TGFBR2, ANLN, P2RX4, ADAM9, PRKD2, TEK, CLASP1                                                                                                                                                                                                                                                                      |
| cellular localization                                    | 52 | 1.61E-05 | ITGB1, RAB3B, C2CD5, IPO11, CD81, ITGB3, F11R, ACTB, LMNB1, PCM1, FTH1, FLOT1, RAC2, BCAP29, H4C1, ATP5F1EP2, HTATIP2, ANXA2, SCRIB, ATP1B3, RHOB, SFPQ, LSG1, NPC1, NEMF, NPC2, RILPL1, NCBP3, MAD1L1, NDUFB11, HM13, TOR1AIP2, ARL2, PTTG1IP, MFF, PPM1F, RTN4, UBE2J1, BLOC1S1, EPB41L3, PCNT, EXOSC2, CLASP1, ATP5ME, S100A10, BCAP31, ALYREF, DTNBP1, ERBIN, ATP5F1E, P2RX4, REEP5 |
| anatomical structure formation involved in morphogenesis | 29 | 1.72E-05 | ACVRL1, ITGB1, GRN, CD40, ITGB5, CD81, ITGB3, FHL2, CLEC14A, RTN4, CSRP1, EPB41L3, FLOT1, ITGAV, CLASP1, HTATIP2, RBM15, ANXA2, MCAM, ACTN1, PRKCA, SCRIB, RHOB, TGFBR2, ADAM9, PRKD2, TEK, MYH6, MYH7                                                                                                                                                                                  |

|                                       |    |          |                                                                                                                                                                                                                                                                                                                                                                                                                                                                                                                                          |
|---------------------------------------|----|----------|------------------------------------------------------------------------------------------------------------------------------------------------------------------------------------------------------------------------------------------------------------------------------------------------------------------------------------------------------------------------------------------------------------------------------------------------------------------------------------------------------------------------------------------|
| positive regulation of cell motility  | 19 | 2.38E-05 | ITGB1, GRN, CD40, CD151, MCAM, ITGB3, PRKCA, PPM1F, RTN4, RHOB, TGFBR2, ICAM1, P2RX4, RAC2, ADAM9, ITGAV, PRKD2, TEK, CLASP1                                                                                                                                                                                                                                                                                                                                                                                                             |
| single-organism cellular localization | 26 | 2.44E-05 | ITGB1, RAB3B, C2CD5, IPO11, NDUFB11, CD81, PTTG1IP, F11R, ACTB, PCM1, BLOC1S1, EPB41L3, FLOT1, ATP5F1EP2, ATP5ME, S100A10, ANXA2, DTNBP1, SCRIB, ATP1B3, ATP5F1E, SFPQ, NPC1, NPC2, RILPL1, NCBP3                                                                                                                                                                                                                                                                                                                                        |
| cell-cell adhesion                    | 25 | 2.5E-05  | ITGB1, ITGB5, CD81, ITGB3, ICAM2, F11R, PPM1F, ACTB, ICAM1, ALCAM, LGALS1, CSRP1, FLOT1, RAC2, SIRPA, PIEZO1, ITGAV, ANXA2, PRKCA, SCRIB, TGFBR2, TNFSF4, ADAM9, CD44, MAD1L1                                                                                                                                                                                                                                                                                                                                                            |
| transport                             | 71 | 2.67E-05 | ITGB1, RAB3B, C2CD5, IPO11, CD81, ITGB3, FHL1, F11R, ACTB, ICAM1, PCM1, FTH1, FLOT1, RAC2, BCAP29, PIEZO1, SIRPA, ITGAV, ATP5F1EP2, HTATIP2, ABCC1, TRPC5, ATP6V1G1, ANXA2, FNBP1, TRPC4, COG5, SCRIB, ATP1B3, RHOB, TGFBR2, SLC7A5, SFPQ, LSG1, DNAJC1, NPC1, NEMF, NPC2, RILPL1, ADAM9, NCBP3, GRN, CD151, NDUFB11, HM13, SLC38A10, PTTG1IP, MFF, PPM1F, UBE2J1, ARHGAP12, ATXN2, BLOC1S1, ATP6V0A2, LRRC8D, PCNT, CLASP1, ATP5ME, S100A10, BCAP31, ALYREF, HIP1R, DTNBP1, ERBIN, WWP2, ATP5F1E, P2RX4, FABP4, REEP5, ANXA2P2, SERINC3 |

|                                                    |    |          |                                                                                                                                                                                                                                                                                                                                                                |
|----------------------------------------------------|----|----------|----------------------------------------------------------------------------------------------------------------------------------------------------------------------------------------------------------------------------------------------------------------------------------------------------------------------------------------------------------------|
| immune system process                              | 51 | 2.87E-05 | ITGB1, RAB3B, CD40, CD81, ITGB3, F11R, ACTB, ICAM1, BABAM1, ALCAM, LGALS1, TRIM4, FTH1, DPF2, FLOT1, RAC2, SIRPA, H4C1, LBR, RBM15, ANXA2, ACTN1, PRKCA, SCRIB, GTPBP1, TGFBR2, SLC7A5, SFPQ, ADAM9, PRKD2, NCBP3, PLCB1, MAD1L1, CD44, GRN, CD151, RTN4, UBE2J1, EXOSC6, ATP6V0A2, CD59, CMTM3, PLEKHA1, ERBIN, LNPEP, ANLN, P2RX4, TNFSF4, ZYX, TEK, SERINC3 |
| anatomical structure morphogenesis                 | 49 | 3.19E-05 | ACVRL1, ITGB1, CD40, ITGB5, CD81, ITGB3, FHL1, FHL2, CLEC14A, F11R, ACTB, ICAM1, ALCAM, CSRP1, BASP1, FLOT1, RAC2, ITGAV, HTATIP2, TRPC5, RBM15, ANXA2, ACTN1, PRKCA, SCRIB, RHOB, TGFBR2, SLC7A5, RILPL1, MYL3, ADAM9, PRKD2, MYH6, CD44, MYH7, GRN, CD151, MFF, RTN4, ARHGAP12, STRIP1, EPB41L3, CLASP1, S100A10, PLEKHA1, MCAM, DTNBP1, PDCD4, TEK          |
| positive regulation of cellular component movement | 19 | 3.46E-05 | ITGB1, GRN, CD40, CD151, MCAM, ITGB3, PRKCA, PPM1F, RTN4, RHOB, TGFBR2, ICAM1, P2RX4, RAC2, ADAM9, ITGAV, PRKD2, TEK, CLASP1                                                                                                                                                                                                                                   |
| positive regulation of response to stimulus        | 45 | 3.51E-05 | ACVRL1, ITGB1, LRRC59, GRN, CD40, CD81, ITGB3, F11R, MFF, PPM1F, RTN4, ACTB, ICAM1, BABAM1, EXOSC6, LGALS1, DPF2, FLOT1, TIMP2, RAC2, CD59, ITGAV, S100A10, BCAP31, ABCC1, PLEKHA1, CMTM3, ANXA2, HIP1R, ERBIN, PRKCA, TGFBR2,                                                                                                                                 |

|                                         |    |          |                                                                                                                                                                                                                                                                                                     |
|-----------------------------------------|----|----------|-----------------------------------------------------------------------------------------------------------------------------------------------------------------------------------------------------------------------------------------------------------------------------------------------------|
|                                         |    |          | SLC7A5, SFPQ, P2RX4, FABP4, TNFSF4, GID8, PDCD4, ADAM9, PRKD2, TEK, PLCB1, SERINC3, CD44                                                                                                                                                                                                            |
| interaction with host                   | 11 | 3.75E-05 | ITGB1, LGALS1, NPC1, ITGB5, CD81, ITGB3, WWP2, ITGAV, SCRIB, F11R, ICAM1                                                                                                                                                                                                                            |
| positive regulation of angiogenesis     | 11 | 4.06E-05 | ITGB1, ACVRL1, GRN, CD40, ITGB3, PRKD2, PRKCA, TEK, RTN4, RHOB, TGFBR2                                                                                                                                                                                                                              |
| cell-substrate junction assembly        | 8  | 4.15E-05 | ACVRL1, LIMCH1, ACTN1, ITGB3, TEK, CLASP1, PPM1F, S100A10                                                                                                                                                                                                                                           |
| positive regulation of locomotion       | 19 | 4.41E-05 | ITGB1, GRN, CD40, CD151, MCAM, ITGB3, PRKCA, PPM1F, RTN4, RHOB, TGFBR2, ICAM1, P2RX4, RAC2, ADAM9, ITGAV, PRKD2, TEK, CLASP1                                                                                                                                                                        |
| cell death                              | 41 | 5.27E-05 | ITGB1, GRN, CD40, ITGB3, FHL2, PTTG1IP, MFF, GIMAP8, PPM1F, RTN4, ACTB, ICAM1, BCL2L13, LGALS1, EPB41L3, TNFAIP8L1, DPF2, BCAP29, ITGAV, HTATIP2, BCAP31, TRPC5, ACTN1, HIP1R, DTNBP1, PRKCA, SCRIB, DHCR24, RHOB, TGFBR2, SLC7A5, SFPQ, P2RX4, NPC1, RILPL1, PDCD4, JTB, PRKD2, TEK, SERINC3, CD44 |
| protein localization to plasma membrane | 12 | 5.71E-05 | ITGB1, RAB3B, C2CD5, ANXA2, RILPL1, CD81, EPB41L3, FLOT1, ATP1B3, SCRIB, F11R, S100A10                                                                                                                                                                                                              |

|                                           |    |          |                                                                                                                                                                                                                                                                                                                                                                                                                                                             |
|-------------------------------------------|----|----------|-------------------------------------------------------------------------------------------------------------------------------------------------------------------------------------------------------------------------------------------------------------------------------------------------------------------------------------------------------------------------------------------------------------------------------------------------------------|
| organelle organization                    | 64 | 6.3E-05  | ITGB1, C2CD5, MAST4, ITGB5, ITGB3, F11R, ACTB, LMNB1, ICAM1, BABAM1, HMGN4, PCM1, CSRP1, NTMT1, WDR5, DPF2, RAC2, H4C1, ANXA2, LIMCH1, COG5, ACTN1, UBE2E1, VRK1, PRKCA, RHOB, SFPQ, RILPL1, JTB, PRKD2, PLCB1, MYH6, MAD1L1, MYH7, DCTN6, GRN, NDUFB11, TEX264, TOR1AIP2, ARL2, NCAPG, PDS5B, MFF, PPM1F, RTN4, ARHGAP12, STRIP1, ATXN2, BLOC1S1, EPB41L3, PCNT, MPDZ, PDLIM4, CLASP1, S100A10, BCAP31, KLHL1, HIP1R, DTNBP1, ERBIN, ANLN, REEP5, ZYX, TEK |
| movement of cell or subcellular component | 41 | 6.35E-05 | ACVRL1, ITGB1, GRN, CD40, CD151, ITGB5, CD81, ITGB3, CLEC14A, F11R, PPM1F, RTN4, ACTB, ICAM1, PCM1, ALCAM, BLOC1S1, RAC2, SIRPA, ITGAV, CLASP1, ABCC1, LIMCH1, MCAM, ACTN1, DTNBP1, PRKCA, SCRIB, RHOB, TGFBR2, ANLN, SFPQ, P2RX4, MYL1, ADAM9, PRKD2, TEK, PLCB1, CD44, MYH6, MYH7                                                                                                                                                                         |
| cell migration                            | 32 | 6.41E-05 | ACVRL1, ITGB1, GRN, CD40, CD151, ITGB5, CD81, ITGB3, CLEC14A, F11R, PPM1F, RTN4, ICAM1, PCM1, RAC2, SIRPA, ITGAV, CLASP1, ABCC1, LIMCH1, MCAM, PRKCA, SCRIB, RHOB, TGFBR2, ANLN, P2RX4, ADAM9, PRKD2, TEK, PLCB1, CD44                                                                                                                                                                                                                                      |
| regulation of cell junction assembly      | 8  | 6.43E-05 | ACVRL1, LIMCH1, FLOT1, TEK, F11R, CLASP1, PPM1F, S100A10                                                                                                                                                                                                                                                                                                                                                                                                    |

|                                                  |    |          |                                                                                                                                                                                                                                                                    |
|--------------------------------------------------|----|----------|--------------------------------------------------------------------------------------------------------------------------------------------------------------------------------------------------------------------------------------------------------------------|
| regulation of cell-substrate adhesion            | 11 | 7.15E-05 | ACVRL1, LGALS1, LIMCH1, ITGB3, RAC2, ARL2, TEK, HSD17B12, CLASP1, PPM1F, S100A10                                                                                                                                                                                   |
| protein localization to cell periphery           | 13 | 8.12E-05 | ITGB1, RAB3B, C2CD5, ANXA2, CD81, ATP1B3, SCRIB, F11R, ACTB, RILPL1, EPB41L3, FLOT1, S100A10                                                                                                                                                                       |
| cellular macromolecule localization              | 37 | 8.21E-05 | ITGB1, RAB3B, C2CD5, IPO11, CD81, HM13, TOR1AIP2, ARL2, PTTG1IP, F11R, MFF, RTN4, ACTB, UBE2J1, LMNB1, PCM1, EPB41L3, FLOT1, RAC2, BCAP29, H4C1, PCNT, EXOSC2, S100A10, BCAP31, ANXA2, ALYREF, ERBIN, SCRIB, ATP1B3, RHOB, SFPQ, LSG1, NPC1, RILPL1, NCBP3, MAD1L1 |
| cell adhesion mediated by integrin               | 7  | 8.66E-05 | ITGB1, ITGB5, ITGB3, ADAM9, PIEZO1, ITGAV, ICAM1                                                                                                                                                                                                                   |
| regulation of anatomical structure morphogenesis | 26 | 9.41E-05 | ACVRL1, ITGB1, GRN, CD40, ITGB3, F11R, MFF, RTN4, ICAM1, STRIP1, BASP1, EPB41L3, FLOT1, RAC2, CLASP1, S100A10, HTATIP2, TRPC5, DTNBP1, PRKCA, RHOB, TGFBR2, ADAM9, PRKD2, TEK, CD44                                                                                |
| positive regulation of vasculature development   | 11 | 0.000108 | ITGB1, ACVRL1, GRN, CD40, ITGB3, PRKD2, PRKCA, TEK, RTN4, RHOB, TGFBR2                                                                                                                                                                                             |
| organic substance transport                      | 45 | 0.000112 | ITGB1, RAB3B, C2CD5, IPO11, CD81, HM13, ITGB3, SLC38A10, PTTG1IP, MFF, PPM1F, ACTB, UBE2J1, ATXN2, PCM1, FLOT1, RAC2, BCAP29, LRRC8D, ITGAV, PCNT, BCAP31, ABCC1, ANXA2, COG5,                                                                                     |

|                                   |    |          |                                                                                                                                                                                                                                                                                                                                                                                                |
|-----------------------------------|----|----------|------------------------------------------------------------------------------------------------------------------------------------------------------------------------------------------------------------------------------------------------------------------------------------------------------------------------------------------------------------------------------------------------|
|                                   |    |          | TRPC4, ALYREF, DTNBP1, ERBIN, SCRIB, WWP2, RHOB, TGFBR2, SLC7A5, SFPQ, DNAJC1, LSG1, P2RX4, FABP4, NPC1, NPC2, RILPL1, ADAM9, NCBP3, SERINC3                                                                                                                                                                                                                                                   |
| supramolecular fiber organization | 21 | 0.000114 | ITGB1, ITGB5, ANXA2, LIMCH1, ACTN1, HIP1R, ARL2, F11R, PPM1F, RHOB, ICAM1, ARHGAP12, PCM1, CSRP1, ZYX, RAC2, CLASP1, PFDN6, MYH6, S100A10, MYH7                                                                                                                                                                                                                                                |
| positive regulation of transport  | 23 | 0.000126 | ITGB1, RAB3B, BCAP31, C2CD5, CD151, ANXA2, CD81, FHL1, HIP1R, DTNBP1, ATP1B3, MFF, ACTB, SLC7A5, PCM1, P2RX4, FLOT1, RAC2, ADAM9, SIRPA, PCNT, CLASP1, S100A10                                                                                                                                                                                                                                 |
| plasma membrane organization      | 14 | 0.000136 | ITGB1, RAB3B, C2CD5, TRPC5, ANXA2, CD81, ATP1B3, SCRIB, F11R, ACTB, RILPL1, EPB41L3, FLOT1, S100A10                                                                                                                                                                                                                                                                                            |
| single-organism localization      | 51 | 0.000139 | ITGB1, RAB3B, C2CD5, IPO11, CD81, ITGB3, FHL1, F11R, ACTB, PCM1, FTH1, FLOT1, RAC2, SIRPA, ITGAV, ATP5F1EP2, ABCC1, ATP6V1G1, ANXA2, TRPC4, SCRIB, ATP1B3, SLC7A5, SFPQ, DNAJC1, NPC1, NPC2, RILPL1, ADAM9, NCBP3, MAD1L1, NDUFB11, ARL2, SLC38A10, PTTG1IP, ARHGAP12, ATXN2, BLOC1S1, EPB41L3, ATP6V0A2, LRRC8D, CLASP1, ATP5ME, S100A10, HIP1R, DTNBP1, WWP2, ATP5F1E, P2RX4, FABP4, SERINC3 |
| regulation of cell-cell adhesion  | 16 | 0.000151 | CD81, PRKCA, SCRIB, F11R, PPM1F, ACTB, TGFBR2, ICAM1, LGALS1, TNFSF4, FLOT1, RAC2, PIEZO1, SIRPA, CD44, MAD1L1                                                                                                                                                                                                                                                                                 |



|                                               |    |          |                                                                                                                                                                                                                                                            |
|-----------------------------------------------|----|----------|------------------------------------------------------------------------------------------------------------------------------------------------------------------------------------------------------------------------------------------------------------|
| positive regulation of organelle organization | 19 | 0.000152 | GRN, C2CD5, ANXA2, LIMCH1, HIP1R, ARL2, NCAPG, MFF, PPM1F, ICAM1, SFPQ, WDR5, RAC2, PRKD2, TEK, PLCB1, CLASP1, MAD1L1, S100A10                                                                                                                             |
| receptor-mediated endocytosis                 | 12 | 0.000152 | ITGB1, ATXN2, ANXA2, CD81, ITGB3, HIP1R, FLOT1, DTNBP1, ITGAV, SCRIB, ACTB, TGFBR2                                                                                                                                                                         |
| cellular protein localization                 | 36 | 0.000161 | ITGB1, RAB3B, C2CD5, IPO11, CD81, HM13, TOR1AIP2, ARL2, PTTG1IP, F11R, MFF, RTN4, ACTB, UBE2J1, LMNB1, PCM1, EPB41L3, FLOT1, RAC2, BCAP29, H4C1, PCNT, S100A10, BCAP31, ANXA2, ALYREF, ERBIN, SCRIB, ATP1B3, RHOB, SFPQ, LSG1, NPC1, RILPL1, NCBP3, MAD1L1 |
| regulation of cell death                      | 34 | 0.000172 | ITGB1, GRN, CD40, ITGB3, FHL2, PTTG1IP, MFF, GIMAP8, PPM1F, RTN4, ACTB, ICAM1, BCL2L13, LGALS1, TNFAIP8L1, ITGAV, HTATIP2, BCAP31, ACTN1, HIP1R, DTNBP1, PRKCA, SCRIB, DHCR24, RHOB, SLC7A5, SFPQ, NPC1, RILPL1, PDCD4, PRKD2, TEK, SERINC3, CD44          |
| regulation of cellular component organization | 47 | 0.000183 | ACVRL1, ITGB1, GRN, C2CD5, CD151, ITGB3, FHL1, ARL2, NCAPG, F11R, MFF, DNPH1, PPM1F, RTN4, ACTB, ICAM1, STRIP1, ATXN2, LGALS1, EPB41L3, WDR5, DPF2, FLOT1, RAC2, SIRPA, PIEZO1, ITGAV, MPDZ, EXOSC2, CLASP1, S100A10, TRPC5, ANXA2,                        |

|                                       |    |          |                                                                                                                                                                                                                                                                                                                     |
|---------------------------------------|----|----------|---------------------------------------------------------------------------------------------------------------------------------------------------------------------------------------------------------------------------------------------------------------------------------------------------------------------|
|                                       |    |          | LIMCH1, HIP1R, DTNBP1, SCAF4, RHOB, ANLN, SFPQ, ADAM9, PRKD2, TEK, PLCB1, CD44, PFDN6, MAD1L1                                                                                                                                                                                                                       |
| cellular component morphogenesis      | 25 | 0.000192 | ITGB1, ITGB3, F11R, MFF, RTN4, ACTB, ICAM1, ALCAM, CSRP1, EPB41L3, FLOT1, RAC2, ITGAV, CLASP1, S100A10, TRPC5, ACTN1, DTNBP1, SCRIB, RHOB, RILPL1, TEK, CD44, MYH6, MYH7                                                                                                                                            |
| establishment of localization in cell | 39 | 0.000215 | ITGB1, RAB3B, C2CD5, IPO11, NDUFB11, CD81, HM13, ITGB3, PTTG1IP, MFF, ACTB, UBE2J1, LMNB1, PCM1, BLOC1S1, RAC2, BCAP29, ATP5F1EP2, PCNT, CLASP1, ATP5ME, HTATIP2, BCAP31, ANXA2, ALYREF, DTNBP1, ERBIN, SCRIB, ATP5F1E, RHOB, SFPQ, LSG1, P2RX4, NPC1, NEMF, NPC2, RILPL1, NCBP3, MAD1L1                            |
| protein localization                  | 44 | 0.000216 | ITGB1, RAB3B, C2CD5, IPO11, CD81, HM13, TOR1AIP2, ARL2, PTTG1IP, F11R, MFF, PPM1F, RTN4, ACTB, UBE2J1, LMNB1, PCM1, ODR4, EPB41L3, FLOT1, RAC2, BCAP29, H4C1, PCNT, S100A10, BCAP31, PLEKHA1, ANXA2, COG5, ALYREF, ERBIN, SCRIB, ATP1B3, WWP2, DHCR24, RHOB, SFPQ, DNAJC1, LSG1, NPC1, RILPL1, ADAM9, NCBP3, MAD1L1 |
| angiogenesis                          | 17 | 0.000233 | ITGB1, ACVRL1, GRN, CD40, RBM15, ANXA2, MCAM, ITGB3, PRKCA, CLEC14A, RTN4, RHOB, TGFBR2, ITGAV, PRKD2, TEK, HTATIP2                                                                                                                                                                                                 |

|                                                        |    |          |                                                                                                                                                                                                                                                                                                    |
|--------------------------------------------------------|----|----------|----------------------------------------------------------------------------------------------------------------------------------------------------------------------------------------------------------------------------------------------------------------------------------------------------|
| programmed cell death                                  | 37 | 0.000235 | ITGB1, GRN, CD40, FHL2, PTTG1IP, MFF, GIMAP8, PPM1F, RTN4, ACTB, ICAM1, BCL2L13, LGALS1, EPB41L3, TNFAIP8L1, DPF2, BCAP29, ITGAV, HTATIP2, BCAP31, TRPC5, ACTN1, HIP1R, PRKCA, SCRIB, DHCR24, RHOB, TGFBR2, SLC7A5, SFPQ, P2RX4, PDCD4, JTB, PRKD2, TEK, SERINC3, CD44                             |
| positive regulation of cellular component organization | 29 | 0.000262 | ITGB1, GRN, C2CD5, CD151, ITGB3, ARL2, NCAPG, MFF, PPM1F, ICAM1, WDR5, FLOT1, RAC2, SIRPA, PIEZO1, CLASP1, S100A10, TRPC5, ANXA2, LIMCH1, HIP1R, DTNBP1, ANLN, SFPQ, ADAM9, PRKD2, TEK, PLCB1, MAD1L1                                                                                              |
| regulation of response to external stimulus            | 22 | 0.000267 | ABCC1, GRN, ANXA2, CD81, PRKCA, SCRIB, F11R, PPM1F, TGFBR2, P2RX4, LGALS1, FABP4, TNFSF4, ZYX, PDCD4, RAC2, SIRPA, CD59, PRKD2, TEK, CLASP1, MGLL                                                                                                                                                  |
| morphogenesis of an epithelial sheet                   | 6  | 0.00027  | ITGB1, ACVRL1, CD151, CD44, CLASP1, ARHGAP12                                                                                                                                                                                                                                                       |
| adherens junction organization                         | 8  | 0.000278 | ACVRL1, LIMCH1, ACTN1, TEK, CLASP1, ACTB, PPM1F, S100A10                                                                                                                                                                                                                                           |
| cellular developmental process                         | 65 | 0.000279 | ACVRL1, ITGB1, ITGB5, CD81, ITGB3, FHL1, FHL2, F11R, DNPH1, ACTB, ICAM1, PCM1, ALCAM, LGALS1, CSRP1, BASP1, TIMP2, WDR5, DPF2, FLOT1, RAC2, BCAP29, PIEZO1, ITGAV, H4C1, LBR, HTATIP2, TRPC5, RBM15, ANXA2, TRPC4, ACTN1, PRKCA, SCRIB, RHOB, TGFBR2, SLC7A5, BACE2, RILPL1, ADAM9, TAGLN2, PLCB1, |

|                                                   |    |          |                                                                                                                                                                                                                                                                                                                                                                                                                                                            |
|---------------------------------------------------|----|----------|------------------------------------------------------------------------------------------------------------------------------------------------------------------------------------------------------------------------------------------------------------------------------------------------------------------------------------------------------------------------------------------------------------------------------------------------------------|
|                                                   |    |          | MYH6, CD44, MYH7, GRN, MFF, RTN4, UBE2J1, BLOC1S1, EPB41L3, RBBP9, CLASP1, S100A10, PLEKHA1, ALYREF, KLHL1, DTNBP1, PRRC2B, ANLN, P2RX4, FABP4, TNFSF4, PDCD4, TEK                                                                                                                                                                                                                                                                                         |
| cell differentiation                              | 63 | 0.000279 | ACVRL1, ITGB1, ITGB5, CD81, ITGB3, FHL1, FHL2, F11R, DNPH1, ACTB, ICAM1, PCM1, ALCAM, LGALS1, CSRP1, BASP1, TIMP2, WDR5, DPF2, FLOT1, RAC2, BCAP29, PIEZO1, ITGAV, H4C1, LBR, HTATIP2, TRPC5, RBM15, ANXA2, TRPC4, ACTN1, PRKCA, SCRIB, RHOB, TGFBR2, SLC7A5, BACE2, RILPL1, ADAM9, TAGLN2, PLCB1, MYH6, MYH7, GRN, RTN4, UBE2J1, BLOC1S1, EPB41L3, RBBP9, CLASP1, S100A10, PLEKHA1, ALYREF, KLHL1, DTNBP1, PRRC2B, ANLN, P2RX4, FABP4, TNFSF4, PDCD4, TEK |
| cell-cell junction organization                   | 11 | 0.000285 | ACVRL1, LIMCH1, ACTN1, EPB41L3, ARL2, PRKCA, TEK, CLASP1, ACTB, PPM1F, S100A10                                                                                                                                                                                                                                                                                                                                                                             |
| heterotypic cell-cell adhesion                    | 6  | 0.000291 | ITGB1, ITGB3, FLOT1, SIRPA, ITGAV, CD44                                                                                                                                                                                                                                                                                                                                                                                                                    |
| positive regulation of endothelial cell migration | 8  | 0.000304 | GRN, CD40, P2RX4, ITGB3, PRKD2, PRKCA, TEK, RHOB                                                                                                                                                                                                                                                                                                                                                                                                           |
| blood coagulation                                 | 10 | 0.000326 | CD40, CSRP1, ANXA2, DGKA, ITGB3, DTNBP1, CD59, PRKCA, F11R, ACTB                                                                                                                                                                                                                                                                                                                                                                                           |

|                                   |    |          |                                                                                                                                                                                                                                           |
|-----------------------------------|----|----------|-------------------------------------------------------------------------------------------------------------------------------------------------------------------------------------------------------------------------------------------|
| endothelial cell migration        | 11 | 0.000338 | ITGB1, ACVRL1, GRN, CD40, P2RX4, ITGB3, PRKD2, PRKCA, CLEC14A, TEK, RHOB                                                                                                                                                                  |
| regulation of cell migration      | 23 | 0.000346 | ITGB1, ACVRL1, GRN, CD40, CD151, CD81, LIMCH1, MCAM, ITGB3, PRKCA, PPM1F, RTN4, RHOB, TGFBR2, ICAM1, P2RX4, RAC2, ADAM9, ITGAV, PRKD2, TEK, PLCB1, CLASP1                                                                                 |
| cell activation                   | 25 | 0.000347 | ITGB1, GRN, CD40, CD151, CD81, DGKA, ITGB3, F11R, ACTB, ICAM1, EXOSC6, LGALS1, CSRP1, RAC2, SIRPA, PRKCA, SCRIB, TGFBR2, BACE2, P2RX4, TNFSF4, ADAM9, PLCB1, CD44, MAD1L1                                                                 |
| positive regulation of signaling  | 34 | 0.000348 | ACVRL1, ITGB1, RAB3B, LRRC59, CD40, CD81, ITGB3, F11R, MFF, RTN4, ICAM1, LGALS1, FLOT1, TIMP2, ITGAV, BCAP31, CMTM3, ANXA2, HIP1R, DTNBP1, ERBIN, PRKCA, SCRIB, TGFBR2, SFPQ, P2RX4, GID8, PDCD4, ADAM9, PRKD2, TEK, PLCB1, SERINC3, CD44 |
| wound healing, spreading of cells | 5  | 0.000391 | ITGB1, ACVRL1, CD151, CD44, CLASP1                                                                                                                                                                                                        |
| epiboly involved in wound healing | 5  | 0.000391 | ITGB1, ACVRL1, CD151, CD44, CLASP1                                                                                                                                                                                                        |
| localization of cell              | 33 | 0.000395 | ACVRL1, ITGB1, GRN, CD40, CD151, ITGB5, CD81, ITGB3, CLEC14A, F11R, PPM1F, RTN4, ACTB, ICAM1, PCM1, RAC2, SIRPA, ITGAV,                                                                                                                   |

|                                   |    |          |                                                                                                                                                                                                                                                                                                                                                                                                                                             |
|-----------------------------------|----|----------|---------------------------------------------------------------------------------------------------------------------------------------------------------------------------------------------------------------------------------------------------------------------------------------------------------------------------------------------------------------------------------------------------------------------------------------------|
|                                   |    |          | CLASP1, ABCC1, LIMCH1, MCAM, PRKCA, SCRIB, RHOB, TGFBR2, ANLN, P2RX4, ADAM9, PRKD2, TEK, PLCB1, CD44                                                                                                                                                                                                                                                                                                                                        |
| cell motility                     | 33 | 0.000395 | ACVRL1, ITGB1, GRN, CD40, CD151, ITGB5, CD81, ITGB3, CLEC14A, F11R, PPM1F, RTN4, ACTB, ICAM1, PCM1, RAC2, SIRPA, ITGAV, CLASP1, ABCC1, LIMCH1, MCAM, PRKCA, SCRIB, RHOB, TGFBR2, ANLN, P2RX4, ADAM9, PRKD2, TEK, PLCB1, CD44                                                                                                                                                                                                                |
| nitrogen compound transport       | 38 | 0.000409 | ITGB1, RAB3B, C2CD5, IPO11, CD81, HM13, SLC38A10, PTTG1IP, MFF, PPM1F, ACTB, UBE2J1, ATXN2, PCM1, FLOT1, RAC2, BCAP29, LRRC8D, PCNT, BCAP31, ABCC1, COG5, TRPC4, ALYREF, DTNBP1, ERBIN, SCRIB, WWP2, RHOB, TGFBR2, SLC7A5, SFPQ, DNAJC1, LSG1, RILPL1, ADAM9, NCBP3, SERINC3                                                                                                                                                                |
| single-organism metabolic process | 60 | 0.000417 | PIGS, ITGB1, CD40, CD81, DGKA, ITGB3, SOGA1, DNPH1, ICAM1, TIMP2, WDR5, RAC2, SIRPA, ITGAV, MAN2C1, ATP5F1EP2, LBR, TNS2, ABCC1, ADSL, ANXA2, COG5, ABHD14B, MOGS, PRKCA, DNAJB14, GTPBP1, NPC1, NPC2, PCCB, ADAM9, PRKD2, PLCB1, MYH6, CD44, MGLL, PFDN6, MYH7, GRN, NDUFB11, TEX264, HM13, ARL2, HSD17B12, UBE2J1, EXOSC6, ATXN2, BLOC1S1, AMDHD2, ATP5ME, BCAP31, PLEKHA1, DTNBP1, DHCR24, ATP5F1E, TNFSF4, PDCD4, SERINC1, TEK, SERINC3 |

|                                                |    |          |                                                                                                                                                                                                                                                                                                                                                       |
|------------------------------------------------|----|----------|-------------------------------------------------------------------------------------------------------------------------------------------------------------------------------------------------------------------------------------------------------------------------------------------------------------------------------------------------------|
| regulation of cell-substrate junction assembly | 6  | 0.000418 | ACVRL1, LIMCH1, TEK, CLASP1, PPM1F, S100A10                                                                                                                                                                                                                                                                                                           |
| regulation of focal adhesion assembly          | 6  | 0.000418 | ACVRL1, LIMCH1, TEK, CLASP1, PPM1F, S100A10                                                                                                                                                                                                                                                                                                           |
| hemostasis                                     | 10 | 0.000419 | CD40, CSRP1, ANXA2, DGKA, ITGB3, DTNBP1, CD59, PRKCA, F11R, ACTB                                                                                                                                                                                                                                                                                      |
| stress fiber assembly                          | 7  | 0.000427 | ITGB5, LIMCH1, ZYX, F11R, CLASP1, PPM1F, S100A10                                                                                                                                                                                                                                                                                                      |
| contractile actin filament bundle assembly     | 7  | 0.000427 | ITGB5, LIMCH1, ZYX, F11R, CLASP1, PPM1F, S100A10                                                                                                                                                                                                                                                                                                      |
| coagulation                                    | 10 | 0.000431 | CD40, CSRP1, ANXA2, DGKA, ITGB3, DTNBP1, CD59, PRKCA, F11R, ACTB                                                                                                                                                                                                                                                                                      |
| epiboly                                        | 5  | 0.000434 | ITGB1, ACVRL1, CD151, CD44, CLASP1                                                                                                                                                                                                                                                                                                                    |
| regulation of biological quality               | 60 | 0.000477 | ACVRL1, ITGB1, RAB3B, CD40, CD81, DGKA, ITGB3, FHL1, F11R, ACTB, ICAM1, LGALS1, CSRP1, FTH1, FLOT1, RAC2, PIEZO1, ITGAV, TNS2, ABCC1, TRPC5, ATP6V1G1, ANXA2, TRPC4, PRKCA, SCRIB, ATP1B3, RHOB, SLC7A5, BACE2, NPC1, NPC2, MYL3, MYH6, MAD1L1, PFDN6, MYH7, GRN, ARL2, HSD17B12, RTN4, BLOC1S1, EPB41L3, ATP6V0A2, ZC3H18, LRRC8D, APBB2, CD59, CKB, |

|                                              |    |          |                                                                                                                                                                                                                                                                                                                                                                                                                                                                                                                                                                                    |
|----------------------------------------------|----|----------|------------------------------------------------------------------------------------------------------------------------------------------------------------------------------------------------------------------------------------------------------------------------------------------------------------------------------------------------------------------------------------------------------------------------------------------------------------------------------------------------------------------------------------------------------------------------------------|
|                                              |    |          | BCAP31, PLEKHA1, CNBP, HIP1R, DTNBP1, ERBIN, LNPEP, WWP2, P2RX4, FABP4, TEK                                                                                                                                                                                                                                                                                                                                                                                                                                                                                                        |
| regulation of adherens junction organization | 6  | 0.000547 | ACVRL1, LIMCH1, TEK, CLASP1, PPM1F, S100A10                                                                                                                                                                                                                                                                                                                                                                                                                                                                                                                                        |
| anatomical structure development             | 80 | 0.000554 | ACVRL1, ITGB1, CD40, ITGB5, CD81, ITGB3, FHL1, FHL2, CLEC14A, F11R, DNPH1, ACTB, ICAM1, BABAM1, PCM1, ALCAM, LGALS1, CSRP1, BASP1, TIMP2, WDR5, DPF2, FLOT1, RAC2, PIEZO1, ITGAV, H4C1, LBR, TNS2, HTATIP2, TRPC5, RBM15, ANXA2, TRPC4, ACTN1, PRKCA, SCRIB, RHOB, TGFBR2, SLC7A5, BACE2, RILPL1, MYL3, ADAM9, PRKD2, TAGLN2, PLCB1, MYH6, MAD1L1, CD44, MYH7, GRN, CD151, HM13, SLC38A10, MFF, RTN4, UBE2J1, ARHGAP12, EXOSC6, STRIP1, BLOC1S1, EPB41L3, RBBP9, CKB, PDLIM4, CLASP1, S100A10, CMTM3, PLEKHA1, MCAM, KLHL1, HIP1R, DTNBP1, DHCR24, ANLN, P2RX4, TNFSF4, PDCD4, TEK |
| apoptotic process                            | 34 | 0.000569 | ITGB1, GRN, CD40, FHL2, PTTG1IP, MFF, GIMAP8, PPM1F, RTN4, ICAM1, BCL2L13, LGALS1, EPB41L3, DPF2, BCAP29, ITGAV, HTATIP2, BCAP31, TRPC5, HIP1R, PRKCA, SCRIB, DHCR24, RHOB, TGFBR2, SLC7A5, SFPQ, P2RX4, PDCD4, JTB, PRKD2, TEK, SERINC3, CD44                                                                                                                                                                                                                                                                                                                                     |



|                                           |    |          |                                                                                                                                                                                                                                                                                                                                                                                                                                                                                                                                |
|-------------------------------------------|----|----------|--------------------------------------------------------------------------------------------------------------------------------------------------------------------------------------------------------------------------------------------------------------------------------------------------------------------------------------------------------------------------------------------------------------------------------------------------------------------------------------------------------------------------------|
| muscle structure development              | 18 | 0.000595 | ITGB1, CD81, ACTN1, FHL1, FHL2, ACTB, TGFBR2, LGALS1, CSRP1, BASP1, MYL3, FLOT1, PDCD4, PIEZO1, PLCB1, PDLIM4, MYH6, MYH7                                                                                                                                                                                                                                                                                                                                                                                                      |
| intracellular transport                   | 32 | 0.000596 | C2CD5, IPO11, NDUFB11, CD81, HM13, PTTG1IP, MFF, ACTB, UBE2J1, PCM1, BLOC1S1, RAC2, BCAP29, ATP5F1EP2, PCNT, ATP5ME, HTATIP2, BCAP31, ANXA2, ALYREF, DTNBP1, ERBIN, SCRIB, ATP5F1E, RHOB, SFPQ, LSG1, NPC1, NEMF, NPC2, RILPL1, NCBP3                                                                                                                                                                                                                                                                                          |
| regulation of apoptotic process           | 30 | 0.0006   | ITGB1, GRN, CD40, FHL2, PTTG1IP, MFF, GIMAP8, PPM1F, RTN4, ACTB, ICAM1, BCL2L13, LGALS1, TNFAIP8L1, ITGAV, HTATIP2, BCAP31, ACTN1, HIP1R, PRKCA, SCRIB, DHCR24, RHOB, SLC7A5, SFPQ, PDCD4, PRKD2, TEK, SERINC3, CD44                                                                                                                                                                                                                                                                                                           |
| positive regulation of biological process | 85 | 0.000621 | ACVRL1, ITGB1, RAB3B, CD40, C2CD5, CD81, ITGB3, FHL1, F11R, DNPH1, ACTB, ICAM1, BABAM1, PCM1, LGALS1, BASP1, TIMP2, WDR5, DPF2, FLOT1, RAC2, PIEZO1, SIRPA, ITGAV, HTATIP2, ABCC1, TRPC5, RBM15, ANXA2, LIMCH1, ACTN1, ABHD14B, PRKCA, SCRIB, ATP1B3, GTPBP1, RHOB, TGFBR2, SLC7A5, SFPQ, JTB, ADAM9, PRKD2, PLCB1, MAD1L1, CD44, LRRC59, GRN, CD151, ARL2, NCAPG, HSD17B12, PTTG1IP, MFF, PPM1F, RTN4, EXOSC6, BCL2L13, PRRC1, RBBP9, APBB2, CD59, PCNT, EXOSC2, CLASP1, S100A10, BCAP31, CMTM3, PLEKHA1, CNBP, MCAM, ALYREF, |

|                                     |    |          |                                                                                                                                                                                                                                            |
|-------------------------------------|----|----------|--------------------------------------------------------------------------------------------------------------------------------------------------------------------------------------------------------------------------------------------|
|                                     |    |          | HIP1R, DTNBP1, ERBIN, WWP2, DRAP1, ANLN, P2RX4, FABP4, TNFSF4, GID8, PDCD4, TEK, SERINC3                                                                                                                                                   |
| regulation of immune system process | 30 | 0.00063  | GRN, CD40, CD81, ITGB3, RTN4, ACTB, UBE2J1, ICAM1, EXOSC6, LGALS1, DPF2, FLOT1, RAC2, SIRPA, CD59, H4C1, RBM15, PLEKHA1, CMTM3, ERBIN, PRKCA, SCRIB, TGFBR2, SLC7A5, SFPQ, P2RX4, TNFSF4, PRKD2, PLCB1, MAD1L1                             |
| locomotion                          | 35 | 0.000733 | ACVRL1, ITGB1, GRN, CD40, CD151, ITGB5, CD81, ITGB3, CLEC14A, F11R, PPM1F, RTN4, ACTB, ICAM1, PCM1, ALCAM, RAC2, SIRPA, ITGAV, CLASP1, ABCC1, CMTM3, LIMCH1, MCAM, PRKCA, SCRIB, RHOB, TGFBR2, ANLN, P2RX4, ADAM9, PRKD2, TEK, PLCB1, CD44 |
| regulation of cell motility         | 23 | 0.000766 | ITGB1, ACVRL1, GRN, CD40, CD151, CD81, LIMCH1, MCAM, ITGB3, PRKCA, PPM1F, RTN4, RHOB, TGFBR2, ICAM1, P2RX4, RAC2, ADAM9, ITGAV, PRKD2, TEK, PLCB1, CLASP1                                                                                  |
| regulation of programmed cell death | 30 | 0.000772 | ITGB1, GRN, CD40, FHL2, PTTG1IP, MFF, GIMAP8, PPM1F, RTN4, ACTB, ICAM1, BCL2L13, LGALS1, TNFAIP8L1, ITGAV, HTATIP2, BCAP31, ACTN1, HIP1R, PRKCA, SCRIB, DHCR24, RHOB, SLC7A5, SFPQ, PDCD4, PRKD2, TEK, SERINC3, CD44                       |
| regulation of localization          | 46 | 0.000914 | ACVRL1, ITGB1, RAB3B, GRN, C2CD5, CD40, CD151, CD81, ITGB3, FHL1, MFF, PPM1F, RTN4, ACTB, UBE2J1, ICAM1, ATXN2, PCM1, FLOT1, RAC2, SIRPA, ITGAV, PCNT, CLASP1, S100A10, BCAP31,                                                            |

|                                                      |    |          |                                                                                                                                                                                                                                                                                                                                                             |
|------------------------------------------------------|----|----------|-------------------------------------------------------------------------------------------------------------------------------------------------------------------------------------------------------------------------------------------------------------------------------------------------------------------------------------------------------------|
|                                                      |    |          | ANXA2, LIMCH1, MCAM, ACTN1, HIP1R, DTNBP1, PRKCA, ATP1B3, WWP2, RHOB, TGFBR2, SLC7A5, DNAJC1, P2RX4, REEP5, ADAM9, PRKD2, TEK, PLCB1, MAD1L1                                                                                                                                                                                                                |
| positive regulation of response to external stimulus | 12 | 0.000926 | GRN, ABCC1, P2RX4, LGALS1, FABP4, CD81, TNFSF4, PDCD4, RAC2, PRKD2, PRKCA, PPM1F                                                                                                                                                                                                                                                                            |
| regulation of cellular component movement            | 24 | 0.000931 | ITGB1, ACVRL1, GRN, CD40, CD151, CD81, LIMCH1, MCAM, ITGB3, ACTN1, PRKCA, PPM1F, RTN4, RHOB, TGFBR2, ICAM1, P2RX4, RAC2, ADAM9, ITGAV, PRKD2, TEK, PLCB1, CLASP1                                                                                                                                                                                            |
| single-organism transport                            | 46 | 0.00094  | ITGB1, RAB3B, C2CD5, IPO11, NDUFB11, CD81, ITGB3, FHL1, SLC38A10, PTTG1IP, ACTB, ARHGAP12, ATXN2, PCM1, BLOC1S1, FLOT1, RAC2, ATP6V0A2, SIRPA, LRRC8D, ITGAV, ATP5F1EP2, CLASP1, ATP5ME, S100A10, ABCC1, ATP6V1G1, ANXA2, TRPC4, HIP1R, DTNBP1, SCRIB, ATP1B3, WWP2, ATP5F1E, SLC7A5, SFPQ, DNAJC1, P2RX4, FABP4, NPC1, NPC2, RILPL1, ADAM9, NCBP3, SERINC3 |
| viral process                                        | 18 | 0.000966 | ITGB1, CD40, ITGB5, CD81, ITGB3, ALYREF, MOGS, WWP2, SCRIB, F11R, ICAM1, LGALS1, NPC1, NPC2, TNFSF4, ITGAV, NCBP3, SERINC3                                                                                                                                                                                                                                  |
| actin filament bundle assembly                       | 8  | 0.000999 | ITGB5, LIMCH1, ACTN1, ZYX, F11R, CLASP1, PPM1F, S100A10                                                                                                                                                                                                                                                                                                     |

|                                                          |    |          |                                                                                                                                                                                                              |
|----------------------------------------------------------|----|----------|--------------------------------------------------------------------------------------------------------------------------------------------------------------------------------------------------------------|
| heart morphogenesis                                      | 10 | 0.001008 | ACVRL1, RBM15, MYL3, PDCD4, FHL2, TEK, MYH6, RTN4, MYH7, TGFBR2                                                                                                                                              |
| positive regulation of cell-cell adhesion                | 11 | 0.001038 | LGALS1, CD81, TNFSF4, FLOT1, PIEZO1, SIRPA, F11R, CD44, ACTB, ICAM1, TGFBR2                                                                                                                                  |
| positive regulation of intracellular signal transduction | 23 | 0.001048 | ITGB1, BCAP31, LRRC59, CD40, CD81, ITGB3, ERBIN, PRKCA, F11R, RTN4, ICAM1, SFPQ, P2RX4, LGALS1, TIMP2, PDCD4, ADAM9, ITGAV, PRKD2, TEK, PLCB1, SERINC3, CD44                                                 |
| adherens junction assembly                               | 6  | 0.001056 | ACVRL1, ACTN1, TEK, ACTB, PPM1F, S100A10                                                                                                                                                                     |
| blood vessel morphogenesis                               | 17 | 0.001084 | ITGB1, ACVRL1, GRN, CD40, RBM15, ANXA2, MCAM, ITGB3, PRKCA, CLEC14A, RTN4, RHOB, TGFBR2, ITGAV, PRKD2, TEK, HTATIP2                                                                                          |
| regulation of vasculature development                    | 13 | 0.0011   | ITGB1, ACVRL1, GRN, CD40, ITGB3, PRKCA, RTN4, RHOB, TGFBR2, PDCD4, PRKD2, TEK, HTATIP2                                                                                                                       |
| positive regulation of signal transduction               | 30 | 0.001102 | ACVRL1, ITGB1, LRRC59, CD40, CD81, ITGB3, F11R, MFF, RTN4, ICAM1, LGALS1, FLOT1, TIMP2, ITGAV, BCAP31, CMTM3, HIP1R, ERBIN, PRKCA, TGFBR2, SFPQ, P2RX4, GID8, PDCD4, ADAM9, PRKD2, TEK, PLCB1, SERINC3, CD44 |
| actin filament bundle organization                       | 8  | 0.001147 | ITGB5, LIMCH1, ACTN1, ZYX, F11R, CLASP1, PPM1F, S100A10                                                                                                                                                      |

|                                          |    |          |                                                                                                                                                                                                                                                                                                                                                                                                                                                                                                                                                                                                           |
|------------------------------------------|----|----------|-----------------------------------------------------------------------------------------------------------------------------------------------------------------------------------------------------------------------------------------------------------------------------------------------------------------------------------------------------------------------------------------------------------------------------------------------------------------------------------------------------------------------------------------------------------------------------------------------------------|
| single-organism<br>developmental process | 83 | 0.001175 | ACVRL1, ITGB1, CD40, ITGB5, CD81, ITGB3, FHL1, FHL2, CLEC14A, F11R, DNPH1, ACTB, ICAM1, BABAM1, PCM1, ALCAM, LGALS1, CSRP1, BASP1, TIMP2, WDR5, DPF2, FLOT1, RAC2, BCAP29, PIEZO1, ITGAV, H4C1, LBR, TNS2, HTATIP2, TRPC5, RBM15, ANXA2, TRPC4, ACTN1, PRKCA, SCRIB, RHOB, TGFBR2, SLC7A5, BACE2, RILPL1, MYL3, ADAM9, PRKD2, TAGLN2, PLCB1, MYH6, MAD1L1, CD44, MYH7, GRN, CD151, HM13, SLC38A10, MFF, RTN4, UBE2J1, ARHGAP12, EXOSC6, BLOC1S1, EPB41L3, RBBP9, CKB, PDLIM4, CLASP1, S100A10, CMTM3, PLEKHA1, MCAM, ALYREF, KLHL1, HIP1R, DTNBP1, DHCR24, PRRC2B, ANLN, P2RX4, FABP4, TNFSF4, PDCD4, TEK |
| integrin-mediated signaling<br>pathway   | 7  | 0.001182 | ITGB1, ITGB5, ITGB3, ERBIN, ZYX, ADAM9, ITGAV                                                                                                                                                                                                                                                                                                                                                                                                                                                                                                                                                             |
| developmental process                    | 84 | 0.001214 | ACVRL1, ITGB1, CD40, ITGB5, CD81, ITGB3, FHL1, FHL2, CLEC14A, F11R, DNPH1, ACTB, ICAM1, BABAM1, PCM1, ALCAM, LGALS1, CSRP1, BASP1, TIMP2, WDR5, DPF2, FLOT1, RAC2, BCAP29, PIEZO1, ITGAV, H4C1, LBR, TNS2, HTATIP2, TRPC5, RBM15, ANXA2, TRPC4, ACTN1, PRKCA, SCRIB, RHOB, TGFBR2, SLC7A5, BACE2, RILPL1, MYL3, ADAM9, PRKD2, TAGLN2, PLCB1, MYH6, MAD1L1, CD44, MYH7, GRN, CD151, HM13, SLC38A10, MFF, RTN4, UBE2J1, ARHGAP12, EXOSC6, STRIP1, BLOC1S1, EPB41L3, RBBP9, CKB, PDLIM4, CLASP1, S100A10, CMTM3, PLEKHA1, MCAM, ALYREF,                                                                      |

|                                     |    |          |                                                                                                                                                                                                                                                                                                                                                                                                                            |
|-------------------------------------|----|----------|----------------------------------------------------------------------------------------------------------------------------------------------------------------------------------------------------------------------------------------------------------------------------------------------------------------------------------------------------------------------------------------------------------------------------|
|                                     |    |          | KLHL1, HIP1R, DTNBP1, DHCR24, PRRC2B, ANLN, P2RX4, FABP4, TNFSF4, PDCD4, TEK                                                                                                                                                                                                                                                                                                                                               |
| regulation of developmental process | 44 | 0.001249 | ACVRL1, ITGB1, GRN, CD40, ITGB3, F11R, MFF, RTN4, ACTB, ICAM1, STRIP1, EXOSC6, PCM1, LGALS1, BASP1, EPB41L3, WDR5, DPF2, FLOT1, TIMP2, RAC2, PIEZO1, ITGAV, H4C1, CLASP1, S100A10, HTATIP2, TRPC5, RBM15, ANXA2, DTNBP1, PRKCA, RHOB, TGFBR2, SLC7A5, P2RX4, TNFSF4, PDCD4, ADAM9, PRKD2, TEK, PLCB1, CD44, MYH6                                                                                                           |
| response to stress                  | 59 | 0.001254 | ACVRL1, ITGB1, CD40, CD81, DGKA, ITGB3, F11R, ACTB, ICAM1, BABAM1, LGALS1, TRIM4, CSRP1, DPF2, FLOT1, SIRPA, ABCC1, ADSL, ANXA2, VRK1, PRKCA, SCRIB, DNAJB14, RHOB, TGFBR2, SLC7A5, SFPQ, ADAM9, NCBP3, PLCB1, MYH6, CD44, MGLL, MYH7, GRN, CD151, MRPS35, HM13, PDS5B, PTTG1IP, RTN4, UBE2J1, LRRC8D, CD59, CLASP1, S100A10, BCAP31, PLEKHA1, MCAM, DTNBP1, ERBIN, DHCR24, P2RX4, FABP4, TNFSF4, ZYX, PDCD4, TEK, SERINC3 |
| cardiac chamber morphogenesis       | 7  | 0.001283 | RBM15, MYL3, FHL2, TEK, MYH6, MYH7, TGFBR2                                                                                                                                                                                                                                                                                                                                                                                 |

|                                              |    |          |                                                                                                                                                                                                                             |
|----------------------------------------------|----|----------|-----------------------------------------------------------------------------------------------------------------------------------------------------------------------------------------------------------------------------|
| multi-organism cellular process              | 18 | 0.001292 | ITGB1, CD40, ITGB5, CD81, ITGB3, ALYREF, MOGS, WWP2, SCRIB, F11R, ICAM1, LGALS1, NPC1, NPC2, TNFSF4, ITGAV, NCBP3, SERINC3                                                                                                  |
| tissue morphogenesis                         | 16 | 0.001301 | ITGB1, ACVRL1, RBM15, CD151, ITGB3, SCRIB, ACTB, RHOB, TGFBR2, ARHGAP12, MYL3, PRKD2, CD44, CLASP1, MYH6, MYH7                                                                                                              |
| regulation of receptor-mediated endocytosis  | 7  | 0.001336 | ATXN2, ANXA2, ITGB3, HIP1R, FLOT1, DTNBP1, ITGAV                                                                                                                                                                            |
| positive regulation of programmed cell death | 16 | 0.001361 | ITGB1, BCAP31, GRN, CD40, HIP1R, SCRIB, MFF, PPM1F, RHOB, ICAM1, BCL2L13, SFPQ, LGALS1, PDCD4, SERINC3, HTATIP2                                                                                                             |
| positive regulation of cell communication    | 32 | 0.001405 | ACVRL1, ITGB1, RAB3B, LRRC59, CD40, CD81, ITGB3, F11R, MFF, RTN4, ICAM1, LGALS1, FLOT1, TIMP2, ITGAV, BCAP31, CMTM3, HIP1R, DTNBP1, ERBIN, PRKCA, TGFBR2, SFPQ, P2RX4, GID8, PDCD4, ADAM9, PRKD2, TEK, PLCB1, SERINC3, CD44 |
| circulatory system development               | 24 | 0.001435 | ITGB1, ACVRL1, GRN, CD40, RBM15, ANXA2, MCAM, ITGB3, FHL2, PRKCA, CLEC14A, RTN4, RHOB, TGFBR2, BASP1, MYL3, PDCD4, ITGAV, PRKD2, TEK, PDLIM4, MYH6, MYH7, HTATIP2                                                           |
| endocytosis                                  | 18 | 0.001459 | ITGB1, CD151, ANXA2, FNBP1, CD81, ITGB3, HIP1R, DTNBP1, SCRIB, ACTB, TGFBR2, ARHGAP12, ATXN2, NPC1, FLOT1, RAC2, SIRPA, ITGAV                                                                                               |

|                                    |     |          |                                                                                                                                                                                                                                                                                                                                                                                                                                                                                                                                                                                                                                                                                                                                                                                                                    |
|------------------------------------|-----|----------|--------------------------------------------------------------------------------------------------------------------------------------------------------------------------------------------------------------------------------------------------------------------------------------------------------------------------------------------------------------------------------------------------------------------------------------------------------------------------------------------------------------------------------------------------------------------------------------------------------------------------------------------------------------------------------------------------------------------------------------------------------------------------------------------------------------------|
| leukocyte cell-cell adhesion       | 13  | 0.001482 | ITGB1, CD81, SCRIB, F11R, ACTB, TGFBR2, ICAM1, LGALS1, TNFSF4, RAC2, SIRPA, CD44, MAD1L1                                                                                                                                                                                                                                                                                                                                                                                                                                                                                                                                                                                                                                                                                                                           |
| platelet activation                | 7   | 0.001504 | CD40, CSRP1, DGKA, ITGB3, PRKCA, F11R, ACTB                                                                                                                                                                                                                                                                                                                                                                                                                                                                                                                                                                                                                                                                                                                                                                        |
| regulation of cell-matrix adhesion | 7   | 0.001504 | ACVRL1, LIMCH1, ITGB3, TEK, CLASP1, PPM1F, S100A10                                                                                                                                                                                                                                                                                                                                                                                                                                                                                                                                                                                                                                                                                                                                                                 |
| protein localization to membrane   | 15  | 0.001526 | ITGB1, RAB3B, C2CD5, ANXA2, CD81, ATP1B3, SCRIB, F11R, MFF, ACTB, NPC1, RILPL1, EPB41L3, FLOT1, S100A10                                                                                                                                                                                                                                                                                                                                                                                                                                                                                                                                                                                                                                                                                                            |
| single-organism process            | 156 | 0.001533 | RAB3B, IPO11, CD81, DGKA, F11R, SOGA1, ACTB, GIMAP8, ICAM1, LGALS1, ALCAM, BASP1, FTH1, DPF2, PIEZO1, SIRPA, BCAP29, H4C1, TNS2, ATP6V1G1, FNBP1, LIMCH1, COG5, ACTN1, VRK1, DNAJB14, MOGS, PRKCA, SCRIB, ATP1B3, GTPBP1, MYL1, MYL3, ADAM9, JTB, PRKD2, TAGLN2, MAD1L1, LRRC59, CD151, NDUFB11, TEX264, TOR1AIP2, ARL2, SLC38A10, NCAPG, PDS5B, PTTG1IP, RTN4, UBE2J1, ARHGAP12, STRIP1, BCL2L13, ATXN2, BLOC1S1, AMDHD2, EPB41L3, ATP6V0A2, ATP5ME, S100A10, MCAM, ALYREF, LNPEP, DHCR24, HELZ, PRRC2B, ANLN, REEP5, TNFSF4, SERINC1, SERINC3, PIGS, ACVRL1, ITGB1, C2CD5, CD40, ITGB5, MAST4, ITGB3, FHL1, FHL2, CLEC14A, USP39, DNPH1, LMNB1, BABAM1, PCM1, CSRP1, NTMT1, TNFAIP8L1, WDR5, TIMP2, FLOT1, RAC2, ITGAV, MAN2C1, ATP5F1EP2, LBR, HTATIP2, ABCC1, TRPC5, ADSL, RBM15, ANXA2, TRPC4, ABHD14B, RHOB, |



|                                           |    |          |                                                                                                                                                                                                                                                                                                                                                 |
|-------------------------------------------|----|----------|-------------------------------------------------------------------------------------------------------------------------------------------------------------------------------------------------------------------------------------------------------------------------------------------------------------------------------------------------|
|                                           |    |          | TGFBR2, SLC7A5, BACE2, SFPQ, DNAJC1, NPC1, NPC2, RILPL1, PCCB, NCBP3, PLCB1, MYH6, MGLL, CD44, PFDN6, MYH7, DCTN6, GRN, HM13, HSD17B12, MFF, PPM1F, EXOSC6, LRRC8D, RBBP9, APBB2, CD59, CKB, PCNT, EXOSC2, PDLIM4, CLASP1, BCAP31, CMTM3, PLEKHA1, CNBP, KLHL1, HIP1R, DTNBP1, ERBIN, WWP2, ATP5F1E, SCAF4, FABP4, P2RX4, GID8, ZYX, PDCD4, TEK |
| actin filament organization               | 13 | 0.001537 | ITGB5, LIMCH1, ACTN1, HIP1R, F11R, PPM1F, RHOB, ICAM1, ARHGAP12, ZYX, RAC2, CLASP1, S100A10                                                                                                                                                                                                                                                     |
| regulation of organelle organization      | 27 | 0.001551 | GRN, C2CD5, ITGB3, ARL2, NCAPG, F11R, MFF, PPM1F, ACTB, ICAM1, ATXN2, WDR5, DPF2, RAC2, MPDZ, CLASP1, S100A10, ANXA2, LIMCH1, HIP1R, RHOB, ANLN, SFPQ, PRKD2, TEK, PLCB1, MAD1L1                                                                                                                                                                |
| positive regulation of catalytic activity | 25 | 0.001564 | ITGB1, GRN, CD40, CD81, ITGB3, TOR1AIP2, F11R, PPM1F, ICAM1, BCL2L13, PRRC1, TIMP2, S100A10, BCAP31, HIP1R, SCRIB, ATP1B3, TGFBR2, MYL3, JTB, ADAM9, PRKD2, SERINC1, TEK, CD44                                                                                                                                                                  |
| regulation of defense response            | 18 | 0.00158  | ABCC1, GRN, CD40, CD81, ERBIN, SCRIB, RTN4, SFPQ, LGALS1, FABP4, TNFSF4, FLOT1, ZYX, PDCD4, SIRPA, CD59, TEK, MGLL                                                                                                                                                                                                                              |
| tissue development                        | 34 | 0.00158  | ACVRL1, ITGB1, CD151, ITGB5, CD81, ITGB3, FHL2, F11R, DNPH1, RTN4, ACTB, ICAM1, ARHGAP12, CSRP1, BASP1, FLOT1, RBBP9, ITGAV, CLASP1, RBM15, SCRIB, DHCR24, RHOB, TGFBR2, RILPL1,                                                                                                                                                                |

|                                          |    |          |                                                                                                                                                                                                                                                                  |
|------------------------------------------|----|----------|------------------------------------------------------------------------------------------------------------------------------------------------------------------------------------------------------------------------------------------------------------------|
|                                          |    |          | MYL3, PDCD4, ADAM9, PRKD2, TAGLN2, PLCB1, CD44, MYH6, MYH7                                                                                                                                                                                                       |
| regulation of angiogenesis               | 12 | 0.001603 | ITGB1, ACVRL1, GRN, CD40, ITGB3, PRKD2, PRKCA, TEK, RTN4, RHOB, TGFBR2, HTATIP2                                                                                                                                                                                  |
| cell development                         | 37 | 0.00167  | ITGB1, GRN, ITGB3, FHL2, F11R, RTN4, ACTB, UBE2J1, ICAM1, PCM1, ALCAM, LGALS1, CSRP1, BLOC1S1, EPB41L3, WDR5, FLOT1, TIMP2, RAC2, ITGAV, S100A10, TRPC5, ANXA2, ACTN1, KLHL1, DTNBP1, SCRIB, TGFBR2, SLC7A5, BACE2, P2RX4, RILPL1, PDCD4, TEK, PLCB1, MYH6, MYH7 |
| cation transport                         | 24 | 0.001747 | ITGB1, RAB3B, ATP6V1G1, TRPC5, ANXA2, NDUFB11, TRPC4, ITGB3, FHL1, SLC38A10, ATP1B3, WWP2, ATP5F1E, ICAM1, SLC7A5, P2RX4, FTH1, ATP6V0A2, PIEZO1, ITGAV, ANXA2P2, SERINC3, ATP5F1EP2, ATP5ME                                                                     |
| regulation of endothelial cell migration | 9  | 0.00175  | ACVRL1, GRN, CD40, P2RX4, ITGB3, PRKD2, PRKCA, TEK, RHOB                                                                                                                                                                                                         |
| regulation of locomotion                 | 23 | 0.001828 | ITGB1, ACVRL1, GRN, CD40, CD151, CD81, LIMCH1, MCAM, ITGB3, PRKCA, PPM1F, RTN4, RHOB, TGFBR2, ICAM1, P2RX4, RAC2, ADAM9, ITGAV, PRKD2, TEK, PLCB1, CLASP1                                                                                                        |

|                                                      |    |          |                                                                                                                                                                                                                                |
|------------------------------------------------------|----|----------|--------------------------------------------------------------------------------------------------------------------------------------------------------------------------------------------------------------------------------|
| symbiosis, encompassing mutualism through parasitism | 18 | 0.001847 | ITGB1, CD40, ITGB5, CD81, ITGB3, ALYREF, MOGS, WWP2, SCRIB, F11R, ICAM1, LGALS1, NPC1, NPC2, TNFSF4, ITGAV, NCBP3, SERINC3                                                                                                     |
| regulation of transport                              | 32 | 0.001865 | ITGB1, RAB3B, C2CD5, CD151, CD81, ITGB3, FHL1, MFF, PPM1F, ACTB, UBE2J1, ICAM1, ATXN2, PCM1, FLOT1, RAC2, SIRPA, ITGAV, PCNT, CLASP1, S100A10, BCAP31, ANXA2, HIP1R, DTNBP1, ATP1B3, WWP2, SLC7A5, DNAJC1, P2RX4, REEP5, ADAM9 |
| positive regulation of developmental process         | 28 | 0.001946 | ACVRL1, ITGB1, GRN, CD40, ITGB3, F11R, MFF, RTN4, ACTB, EXOSC6, BASP1, DPF2, FLOT1, TIMP2, PIEZO1, CLASP1, S100A10, TRPC5, PRKCA, RHOB, TGFBR2, SLC7A5, P2RX4, TNFSF4, ADAM9, PRKD2, TEK, PLCB1                                |
| viral life cycle                                     | 12 | 0.001983 | ITGB1, LGALS1, NPC1, ITGB5, CD81, ITGB3, ALYREF, MOGS, WWP2, ITGAV, F11R, ICAM1                                                                                                                                                |
| interspecies interaction between organisms           | 18 | 0.002151 | ITGB1, CD40, ITGB5, CD81, ITGB3, ALYREF, MOGS, WWP2, SCRIB, F11R, ICAM1, LGALS1, NPC1, NPC2, TNFSF4, ITGAV, NCBP3, SERINC3                                                                                                     |
| homotypic cell-cell adhesion                         | 6  | 0.002228 | LGALS1, CSRP1, ITGB3, PRKCA, F11R, ACTB                                                                                                                                                                                        |
| endothelium development                              | 7  | 0.002263 | ACVRL1, PRKD2, F11R, PLCB1, RTN4, RHOB, ICAM1                                                                                                                                                                                  |

|                                    |    |          |                                                                                                                                                                                                                                                                                                                                                        |
|------------------------------------|----|----------|--------------------------------------------------------------------------------------------------------------------------------------------------------------------------------------------------------------------------------------------------------------------------------------------------------------------------------------------------------|
| phosphorus metabolic process       | 48 | 0.002352 | ACVRL1, PIGS, CD40, MAST4, NDUFB11, CD81, DGKA, ITGB3, ARL2, HSD17B12, DNPH1, PPM1F, ACTB, ICAM1, PRRC1, AMDHD2, FLOT1, TIMP2, SIRPA, ITGAV, CKB, ATP5F1EP2, TNS2, ATP5ME, HTATIP2, ADSL, TRPC5, ANXA2, LIMCH1, DTNBP1, ABHD14B, PRKCA, VRK1, GTPBP1, ATP5F1E, TGFBR2, FABP4, PDCD4, JTB, ADAM9, PRKD2, SERINC1, TEK, PLCB1, SERINC3, CD44, MYH6, MYH7 |
| vasculature development            | 18 | 0.002435 | ITGB1, ACVRL1, GRN, CD40, RBM15, ANXA2, MCAM, ITGB3, PRKCA, CLEC14A, RTN4, RHOB, TGFBR2, PDCD4, ITGAV, PRKD2, TEK, HTATIP2                                                                                                                                                                                                                             |
| cardiovascular system development  | 18 | 0.002435 | ITGB1, ACVRL1, GRN, CD40, RBM15, ANXA2, MCAM, ITGB3, PRKCA, CLEC14A, RTN4, RHOB, TGFBR2, PDCD4, ITGAV, PRKD2, TEK, HTATIP2                                                                                                                                                                                                                             |
| muscle cell differentiation        | 13 | 0.002493 | ITGB1, CD81, ACTN1, FHL2, ACTB, LGALS1, CSRP1, FLOT1, PDCD4, PIEZO1, PLCB1, MYH6, MYH7                                                                                                                                                                                                                                                                 |
| regulation of hydrolase activity   | 22 | 0.002581 | ITGB1, BCAP31, GRN, CD40, ANXA2, HIP1R, TOR1AIP2, ARL2, ATP1B3, DHCR24, SCRIB, F11R, PPM1F, ICAM1, ARHGAP12, BCL2L13, MYL3, TIMP2, PRKD2, CD44, MYH6, S100A10                                                                                                                                                                                          |
| regulation of response to stimulus | 59 | 0.002705 | ACVRL1, ITGB1, CD40, CD81, ITGB3, FHL2, F11R, ACTB, ICAM1, BABAM1, LGALS1, TIMP2, TNFAIP8L1, DPF2, FLOT1, RAC2, SIRPA,                                                                                                                                                                                                                                 |

|                                              |    |          |                                                                                                                                                                                                                                                                                                                                                                                                                                                                |
|----------------------------------------------|----|----------|----------------------------------------------------------------------------------------------------------------------------------------------------------------------------------------------------------------------------------------------------------------------------------------------------------------------------------------------------------------------------------------------------------------------------------------------------------------|
|                                              |    |          | ITGAV, TNS2, ABCC1, ANXA2, PRKCA, SCRIB, TGFBR2, SLC7A5, SFPQ, ADAM9, PRKD2, PLCB1, CD44, MGLL, MYH7, LRRC59, GRN, PTTG1IP, MFF, PPM1F, RTN4, UBE2J1, ARHGAP12, EXOSC6, CD59, CLASP1, S100A10, BCAP31, CMTM3, PLEKHA1, HIP1R, DTNBP1, ERBIN, WWP2, P2RX4, FABP4, TNFSF4, GID8, ZYX, PDCD4, TEK, SERINC3                                                                                                                                                        |
| cortical cytoskeleton organization           | 5  | 0.002755 | STRIP1, ANLN, EPB41L3, RAC2, RHOB                                                                                                                                                                                                                                                                                                                                                                                                                              |
| positive regulation of immune system process | 22 | 0.00307  | CD40, PLEKHA1, CMTM3, CD81, ITGB3, ERBIN, PRKCA, RTN4, ACTB, TGFBR2, ICAM1, SLC7A5, EXOSC6, SFPQ, P2RX4, LGALS1, TNFSF4, FLOT1, RAC2, SIRPA, CD59, PRKD2                                                                                                                                                                                                                                                                                                       |
| mitotic cell cycle process                   | 17 | 0.003228 | ITGB1, DCTN6, FHL1, NCAPG, PRKCA, VRK1, PDS5B, ACTB, RHOB, BABAM1, ANLN, DPF2, JTB, PLCB1, PCNT, CLASP1, MAD1L1                                                                                                                                                                                                                                                                                                                                                |
| positive regulation of cellular process      | 75 | 0.003272 | ACVRL1, ITGB1, RAB3B, CD40, C2CD5, CD81, ITGB3, F11R, DNPH1, ACTB, ICAM1, BABAM1, LGALS1, TIMP2, WDR5, DPF2, FLOT1, RAC2, PIEZO1, SIRPA, ITGAV, HTATIP2, TRPC5, RBM15, ANXA2, LIMCH1, ACTN1, ABHD14B, PRKCA, SCRIB, ATP1B3, GTPBP1, RHOB, TGFBR2, SLC7A5, SFPQ, JTB, ADAM9, PRKD2, PLCB1, MAD1L1, CD44, LRRC59, GRN, CD151, ARL2, NCAPG, PTTG1IP, MFF, PPM1F, RTN4, EXOSC6, BCL2L13, PRRC1, APBB2, EXOSC2, CLASP1, S100A10, BCAP31, CMTM3, CNBP, MCAM, ALYREF, |

|                                                           |    |          |                                                                                                                                                                                                           |
|-----------------------------------------------------------|----|----------|-----------------------------------------------------------------------------------------------------------------------------------------------------------------------------------------------------------|
|                                                           |    |          | HIP1R, DTNBP1, ERBIN, WWP2, DRAP1, ANLN, P2RX4, TNFSF4, GID8, PDCD4, TEK, SERINC3                                                                                                                         |
| positive regulation of apoptotic process                  | 15 | 0.003274 | ITGB1, BCAP31, GRN, CD40, HIP1R, SCRIB, MFF, PPM1F, RHOB, ICAM1, BCL2L13, SFPQ, LGALS1, PDCD4, SERINC3                                                                                                    |
| positive regulation of cellular protein metabolic process | 29 | 0.003376 | ACVRL1, GRN, CD40, CD81, ITGB3, PTTG1IP, PPM1F, ICAM1, BCL2L13, PRRC1, WDR5, FLOT1, TIMP2, S100A10, BCAP31, TRPC5, ANXA2, LIMCH1, CNBP, HIP1R, DTNBP1, PRKCA, TGFBR2, JTB, ADAM9, PRKD2, TEK, PLCB1, CD44 |
| blood vessel development                                  | 17 | 0.003433 | ITGB1, ACVRL1, GRN, CD40, RBM15, ANXA2, MCAM, ITGB3, PRKCA, CLEC14A, RTN4, RHOB, TGFBR2, ITGAV, PRKD2, TEK, HTATIP2                                                                                       |
| regulation of vesicle-mediated transport                  | 14 | 0.00354  | RAB3B, C2CD5, CD151, ANXA2, ITGB3, HIP1R, DTNBP1, ATXN2, FLOT1, RAC2, SIRPA, ITGAV, CLASP1, S100A10                                                                                                       |
| positive regulation of cell death                         | 16 | 0.003588 | ITGB1, BCAP31, GRN, CD40, HIP1R, SCRIB, MFF, PPM1F, RHOB, ICAM1, BCL2L13, SFPQ, LGALS1, PDCD4, SERINC3, HTATIP2                                                                                           |
| mitotic cell cycle                                        | 19 | 0.003606 | ITGB1, DCTN6, FHL1, NCAPG, PRKCA, VRK1, SCRIB, PDS5B, ACTB, RHOB, BABAM1, ANLN, TIMP2, DPF2, JTB, PLCB1, PCNT, CLASP1, MAD1L1                                                                             |

|                                                    |    |          |                                                                                                                                                                                                                                                                                                                                           |
|----------------------------------------------------|----|----------|-------------------------------------------------------------------------------------------------------------------------------------------------------------------------------------------------------------------------------------------------------------------------------------------------------------------------------------------|
| positive regulation of defense response            | 12 | 0.003621 | GRN, SFPQ, ABCC1, CD40, LGALS1, FABP4, CD81, TNFSF4, PDCD4, FLOT1, ERBIN, RTN4                                                                                                                                                                                                                                                            |
| positive regulation of protein metabolic process   | 30 | 0.003662 | ACVRL1, GRN, CD40, CD81, ITGB3, PTTG1IP, PPM1F, ICAM1, BCL2L13, PRRC1, WDR5, FLOT1, TIMP2, S100A10, BCAP31, TRPC5, ANXA2, LIMCH1, CNBP, HIP1R, DTNBP1, PRKCA, WWP2, TGFBR2, JTB, ADAM9, PRKD2, TEK, PLCB1, CD44                                                                                                                           |
| positive regulation of response to wounding        | 6  | 0.00369  | ITGB1, GRN, ANXA2, F11R, TGFBR2, S100A10                                                                                                                                                                                                                                                                                                  |
| regulation of multicellular organismal process     | 48 | 0.003717 | ACVRL1, ITGB1, GRN, CD40, CD81, ITGB3, F11R, PPM1F, RTN4, ACTB, UBE2J1, ICAM1, EXOSC6, PCM1, LGALS1, BASP1, WDR5, DPF2, FLOT1, TIMP2, SIRPA, ITGAV, H4C1, CLASP1, S100A10, HTATIP2, TRPC5, RBM15, ANXA2, HIP1R, DTNBP1, ERBIN, PRKCA, SCRIB, RHOB, TGFBR2, SLC7A5, P2RX4, TNFSF4, MYL3, PDCD4, ADAM9, PRKD2, TEK, PLCB1, MGLL, MYH6, MYH7 |
| regulation of multicellular organismal development | 35 | 0.003752 | ACVRL1, ITGB1, GRN, CD40, ITGB3, F11R, RTN4, ACTB, EXOSC6, PCM1, LGALS1, BASP1, WDR5, DPF2, FLOT1, TIMP2, H4C1, CLASP1, S100A10, HTATIP2, TRPC5, RBM15, ANXA2, DTNBP1, PRKCA, RHOB, TGFBR2, SLC7A5, P2RX4, TNFSF4, PDCD4, PRKD2, TEK, PLCB1, MYH6                                                                                         |

|                                                 |    |          |                                                                                                                                                                                                                                                                                                                                                                                                                                                                                                        |
|-------------------------------------------------|----|----------|--------------------------------------------------------------------------------------------------------------------------------------------------------------------------------------------------------------------------------------------------------------------------------------------------------------------------------------------------------------------------------------------------------------------------------------------------------------------------------------------------------|
| multicellular organism development              | 70 | 0.003828 | ACVRL1, ITGB1, CD40, ITGB5, CD81, ITGB3, FHL1, FHL2, CLEC14A, F11R, ACTB, ICAM1, BABAM1, PCM1, ALCAM, LGALS1, BASP1, TIMP2, WDR5, DPF2, FLOT1, RAC2, ITGAV, H4C1, LBR, TNS2, HTATIP2, TRPC5, RBM15, ANXA2, TRPC4, ACTN1, PRKCA, SCRIB, RHOB, TGFBR2, SLC7A5, BACE2, MYL3, ADAM9, PRKD2, PLCB1, MYH6, MAD1L1, CD44, MYH7, GRN, HM13, SLC38A10, RTN4, EXOSC6, BLOC1S1, EPB41L3, RBBP9, CKB, PDLIM4, CLASP1, S100A10, CMTM3, PLEKHA1, MCAM, KLHL1, HIP1R, DTNBP1, DHCR24, ANLN, P2RX4, TNFSF4, PDCD4, TEK |
| cell-substrate junction assembly                | 5  | 0.003851 | ACVRL1, ACTN1, TEK, PPM1F, S100A10                                                                                                                                                                                                                                                                                                                                                                                                                                                                     |
| focal adhesion assembly                         | 5  | 0.003851 | ACVRL1, ACTN1, TEK, PPM1F, S100A10                                                                                                                                                                                                                                                                                                                                                                                                                                                                     |
| small GTPase mediated signal transduction       | 12 | 0.003869 | ITGB1, LRRC59, FLOT1, TIMP2, RAC2, ERBIN, ITGAV, DHCR24, F11R, RTN4, RHOB, ARHGAP12                                                                                                                                                                                                                                                                                                                                                                                                                    |
| regulation of actin cytoskeleton organization   | 11 | 0.00398  | LIMCH1, ITGB3, HIP1R, RAC2, TEK, F11R, CLASP1, PPM1F, RHOB, ICAM1, S100A10                                                                                                                                                                                                                                                                                                                                                                                                                             |
| phosphate-containing compound metabolic process | 46 | 0.00402  | ACVRL1, PIGS, CD40, MAST4, NDUFB11, CD81, DGKA, ITGB3, ARL2, DNPH1, PPM1F, ACTB, ICAM1, PRRC1, FLOT1, TIMP2, SIRPA, ITGAV, CKB, ATP5F1EP2, TNS2, ATP5ME, HTATIP2, ADSL, TRPC5, ANXA2, LIMCH1, DTNBP1, ABHD14B, PRKCA, VRK1, GTPBP1,                                                                                                                                                                                                                                                                    |



|                                           |    |          |                                                                                                                                                                                                         |
|-------------------------------------------|----|----------|---------------------------------------------------------------------------------------------------------------------------------------------------------------------------------------------------------|
|                                           |    |          | ATP5F1E, TGFBR2, FABP4, PDCD4, JTB, ADAM9, PRKD2, SERINC1, TEK, PLCB1, SERINC3, CD44, MYH6, MYH7                                                                                                        |
| positive regulation of hydrolase activity | 15 | 0.004116 | ITGB1, BCAP31, GRN, CD40, HIP1R, TOR1AIP2, ATP1B3, SCRIB, F11R, PPM1F, ICAM1, BCL2L13, MYL3, PRKD2, S100A10                                                                                             |
| cell morphogenesis                        | 20 | 0.004169 | ITGB1, TRPC5, ITGB3, ACTN1, DTNBP1, SCRIB, F11R, RTN4, ACTB, RHOB, ICAM1, ALCAM, RILPL1, EPB41L3, FLOT1, RAC2, ITGAV, TEK, CD44, S100A10                                                                |
| regulation of cell proliferation          | 30 | 0.004175 | ACVRL1, ITGB1, GRN, CD40, CD81, ITGB3, PDS5B, RTN4, ACTB, FTH1, TIMP2, RAC2, RBBP9, ITGAV, TNS2, TRPC5, ANXA2, CNBP, PRKCA, SCRIB, DHCR24, TGFBR2, SLC7A5, TNFSF4, GID8, PDCD4, JTB, PRKD2, TEK, MAD1L1 |
| amino acid transport                      | 7  | 0.004208 | ITGB1, SLC7A5, TRPC4, DTNBP1, SLC38A10, LRRC8D, SERINC3                                                                                                                                                 |
| single-organism intracellular transport   | 17 | 0.004258 | IPO11, ANXA2, NDUFB11, DTNBP1, SCRIB, PTTG1IP, ATP5F1E, ACTB, PCM1, SFPQ, NPC1, NPC2, BLOC1S1, RILPL1, NCBP3, ATP5F1EP2, ATP5ME                                                                         |
| regulation of catalytic activity          | 38 | 0.004318 | ITGB1, GRN, CD40, CD81, ITGB3, TOR1AIP2, ARL2, F11R, PPM1F, ACTB, ICAM1, ARHGAP12, BCL2L13, PRRC1, TIMP2, RAC2, SIRPA, S100A10, BCAP31, ANXA2, HIP1R, DTNBP1, SCRIB, ATP1B3,                            |

|                                                 |    |          |                                                                                                                                                                                                                                                                                                                                                  |
|-------------------------------------------------|----|----------|--------------------------------------------------------------------------------------------------------------------------------------------------------------------------------------------------------------------------------------------------------------------------------------------------------------------------------------------------|
|                                                 |    |          | DHCR24, TGFBR2, FABP4, MYL3, PDCD4, JTB, ADAM9, PRKD2, SERINC1, TEK, ANXA2P2, PLCB1, CD44, MYH6                                                                                                                                                                                                                                                  |
| cellular component biogenesis                   | 48 | 0.004337 | ACVRL1, ITGB1, CD40, ITGB5, NDUFB11, ITGB3, DDX23, ARL2, USP39, F11R, PPM1F, RTN4, ACTB, LMNB1, ICAM1, EXOSC6, ATXN2, PCM1, CSRP1, EPB41L3, FLOT1, RAC2, LRRC8D, PIEZO1, H4C1, PCNT, EXOSC2, CLASP1, S100A10, ANXA2, LIMCH1, ACTN1, HIP1R, PRKCA, DNAJB14, ANLN, LSG1, NEMF, RILPL1, SNRPG, ZYX, ESF1, SERINC1, SNRPGP15, TEK, MYH6, PFDN6, MYH7 |
| positive regulation of cell proliferation       | 20 | 0.004344 | ITGB1, ACVRL1, GRN, TRPC5, CD40, ANXA2, CD81, CNBP, ITGB3, PRKCA, RTN4, ACTB, TGFBR2, SLC7A5, TNFSF4, GID8, RAC2, ITGAV, PRKD2, TEK                                                                                                                                                                                                              |
| ion transport                                   | 29 | 0.004556 | ITGB1, RAB3B, NDUFB11, ITGB3, FHL1, SLC38A10, ICAM1, FTH1, ATP6V0A2, LRRC8D, PIEZO1, ITGAV, ATP5F1EP2, ATP5ME, ABCC1, ATP6V1G1, TRPC5, ANXA2, TRPC4, DTNBP1, ATP1B3, WWP2, ATP5F1E, SLC7A5, P2RX4, FABP4, NPC2, ANXA2P2, SERINC3                                                                                                                 |
| regulation of intracellular signal transduction | 31 | 0.004671 | ITGB1, LRRC59, CD40, CD81, ITGB3, FHL2, PTTG1IP, F11R, RTN4, ICAM1, ARHGAP12, LGALS1, TNFAIP8L1, FLOT1, TIMP2, SIRPA, ITGAV, BCAP31, PLEKHA1, DTNBP1, ERBIN, PRKCA, SFPQ, P2RX4, PDCD4, ADAM9, PRKD2, TEK, PLCB1, SERINC3, CD44                                                                                                                  |

|                                                       |    |          |                                                                                                                                                                                                                                                                                                                                                                                                                                                                                                                                                                                     |
|-------------------------------------------------------|----|----------|-------------------------------------------------------------------------------------------------------------------------------------------------------------------------------------------------------------------------------------------------------------------------------------------------------------------------------------------------------------------------------------------------------------------------------------------------------------------------------------------------------------------------------------------------------------------------------------|
| single-multicellular organism process                 | 81 | 0.004711 | ACVRL1, ITGB1, CD40, ITGB5, CD81, DGKA, ITGB3, FHL1, FHL2, CLEC14A, F11R, ACTB, ICAM1, BABAM1, PCM1, ALCAM, LGALS1, CSRP1, BASP1, TIMP2, WDR5, DPF2, FLOT1, RAC2, BCAP29, SIRPA, ITGAV, H4C1, LBR, TNS2, HTATIP2, TRPC5, RBM15, ANXA2, TRPC4, ACTN1, PRKCA, SCRIB, RHOB, TGFBR2, SLC7A5, BACE2, NPC1, MYL3, ADAM9, PRKD2, PLCB1, MYH6, MAD1L1, CD44, MYH7, GRN, HM13, SLC38A10, PPM1F, RTN4, UBE2J1, EXOSC6, BLOC1S1, EPB41L3, RBBP9, APBB2, CD59, CKB, PDLIM4, CLASP1, S100A10, CMTM3, PLEKHA1, MCAM, ALYREF, KLHL1, HIP1R, DTNBP1, ERBIN, DHCR24, ANLN, P2RX4, TNFSF4, PDCD4, TEK |
| regulation of inflammatory response                   | 12 | 0.004848 | GRN, ABCC1, LGALS1, FABP4, CD81, TNFSF4, PDCD4, ZYX, SIRPA, CD59, TEK, MGLL                                                                                                                                                                                                                                                                                                                                                                                                                                                                                                         |
| response to endogenous stimulus                       | 29 | 0.004957 | ACVRL1, ITGB1, C2CD5, CD40, ITGB5, CD81, ITGB3, FHL2, SOGA1, ACTB, ICAM1, TIMP2, TNS2, ABCC1, ANXA2, ERBIN, DHCR24, TGFBR2, SLC7A5, P2RX4, NPC1, TNFSF4, ZYX, PDCD4, ADAM9, PRKD2, TEK, PLCB1, CD44                                                                                                                                                                                                                                                                                                                                                                                 |
| cellular component assembly involved in morphogenesis | 6  | 0.005167 | ITGB1, CSRP1, EPB41L3, MYH6, CLASP1, MYH7                                                                                                                                                                                                                                                                                                                                                                                                                                                                                                                                           |

|                                                |    |          |                                                                                                                                                                                                                                                                                                                                                            |
|------------------------------------------------|----|----------|------------------------------------------------------------------------------------------------------------------------------------------------------------------------------------------------------------------------------------------------------------------------------------------------------------------------------------------------------------|
| cation transmembrane transport                 | 19 | 0.005185 | ITGB1, ATP6V1G1, TRPC5, ANXA2, NDUFB11, TRPC4, ITGB3, FHL1, ATP1B3, WWP2, ATP5F1E, SLC7A5, P2RX4, ATP6V0A2, PIEZO1, ITGAV, ANXA2P2, ATP5F1EP2, ATP5ME                                                                                                                                                                                                      |
| chemical homeostasis                           | 23 | 0.005204 | BCAP31, ATP6V1G1, GRN, TRPC5, CD40, TRPC4, CNBP, ITGB3, FHL1, ATP1B3, RTN4, ICAM1, BACE2, P2RX4, LGALS1, FABP4, NPC1, NPC2, FTH1, ATP6V0A2, LRRC8D, ITGAV, CKB                                                                                                                                                                                             |
| cellular extravasation                         | 5  | 0.005209 | ITGB1, SIRPA, F11R, PLCB1, ICAM1                                                                                                                                                                                                                                                                                                                           |
| positive regulation of protein phosphorylation | 20 | 0.005209 | ACVRL1, TRPC5, CD40, ANXA2, CD81, LIMCH1, ITGB3, DTNBP1, PRKCA, TGFBR2, ICAM1, PRRC1, FLOT1, TIMP2, ADAM9, JTB, PRKD2, TEK, PLCB1, CD44                                                                                                                                                                                                                    |
| regulation of response to wounding             | 8  | 0.005356 | ITGB1, GRN, ANXA2, PRKCA, F11R, CLASP1, TGFBR2, S100A10                                                                                                                                                                                                                                                                                                    |
| cardiac chamber development                    | 7  | 0.005638 | RBM15, MYL3, FHL2, TEK, MYH6, MYH7, TGFBR2                                                                                                                                                                                                                                                                                                                 |
| system development                             | 65 | 0.005846 | ACVRL1, ITGB1, CD40, CD81, ITGB3, FHL1, FHL2, CLEC14A, ACTB, ICAM1, BABAM1, PCM1, ALCAM, LGALS1, BASP1, TIMP2, WDR5, DPF2, FLOT1, RAC2, ITGAV, H4C1, LBR, TNS2, HTATIP2, TRPC5, RBM15, ANXA2, TRPC4, ACTN1, PRKCA, SCRIB, RHOB, TGFBR2, SLC7A5, BACE2, MYL3, ADAM9, PRKD2, PLCB1, MYH6, MAD1L1, CD44, MYH7, GRN, SLC38A10, RTN4, EXOSC6, BLOC1S1, EPB41L3, |

|                                                                  |    |          |                                                                                                                                                                                                                                                                                              |
|------------------------------------------------------------------|----|----------|----------------------------------------------------------------------------------------------------------------------------------------------------------------------------------------------------------------------------------------------------------------------------------------------|
|                                                                  |    |          | RBBP9, CKB, PDLIM4, S100A10, PLEKHA1, MCAM, KLHL1, HIP1R, DTNBP1, DHCR24, ANLN, P2RX4, TNFSF4, PDCD4, TEK                                                                                                                                                                                    |
| ion transmembrane transport                                      | 22 | 0.005871 | ITGB1, ABCC1, ATP6V1G1, TRPC5, ANXA2, NDUFB11, TRPC4, ITGB3, FHL1, SLC38A10, ATP1B3, WWP2, ATP5F1E, SLC7A5, P2RX4, ATP6V0A2, LRRC8D, PIEZO1, ITGAV, ANXA2P2, ATP5F1EP2, ATP5ME                                                                                                               |
| positive regulation of small GTPase mediated signal transduction | 5  | 0.005995 | LRRC59, ERBIN, ITGAV, F11R, RTN4                                                                                                                                                                                                                                                             |
| negative regulation of endocytosis                               | 5  | 0.005995 | ATXN2, ANXA2, ITGB3, SIRPA, ITGAV                                                                                                                                                                                                                                                            |
| intracellular signal transduction                                | 40 | 0.006093 | ITGB1, LRRC59, CD40, MAST4, CD81, DGKA, ITGB3, FHL2, PTTG1IP, F11R, PPM1F, RTN4, ICAM1, ARHGAP12, LGALS1, TNFAIP8L1, FLOT1, TIMP2, RAC2, SIRPA, APBB2, ITGAV, TNS2, CLASP1, BCAP31, PLEKHA1, DTNBP1, ERBIN, PRKCA, DHCR24, RHOB, SFPQ, P2RX4, PDCD4, ADAM9, PRKD2, TEK, PLCB1, SERINC3, CD44 |
| blood vessel endothelial cell migration                          | 7  | 0.006116 | ITGB1, ACVRL1, CD40, P2RX4, PRKD2, PRKCA, CLEC14A                                                                                                                                                                                                                                            |

|                                                  |    |          |                                                                                                                                                             |
|--------------------------------------------------|----|----------|-------------------------------------------------------------------------------------------------------------------------------------------------------------|
| epithelium development                           | 22 | 0.006142 | ITGB1, ACVRL1, RBM15, CD151, SCRIB, F11R, DNPH1, RTN4, ACTB, RHOB, TGFBR2, ICAM1, ARHGAP12, BASP1, RILPL1, ADAM9, RBBP9, PRKD2, TAGLN2, PLCB1, CD44, CLASP1 |
| regulation of cellular localization              | 19 | 0.006167 | ITGB1, RAB3B, BCAP31, C2CD5, ANXA2, CD81, ITGB3, DTNBP1, MFF, PPM1F, RTN4, ACTB, UBE2J1, PCM1, P2RX4, REEP5, RAC2, PCNT, MAD1L1                             |
| enzyme linked receptor protein signaling pathway | 19 | 0.006482 | ACVRL1, C2CD5, PLEKHA1, ITGB5, ITGB3, HIP1R, ERBIN, CLEC14A, LNPEP, SOGA1, RTN4, TGFBR2, ZYX, PDCD4, ADAM9, PRKD2, TEK, PLCB1, TNS2                         |
| RNA localization                                 | 8  | 0.0065   | SFPQ, ATXN2, LSG1, ALYREF, FLOT1, NCBP3, EXOSC2, TGFBR2                                                                                                     |
| cellular response to lipopolysaccharide          | 8  | 0.0065   | SLC7A5, CD40, TNFSF4, PDCD4, ADAM9, SIRPA, PRKCA, ICAM1                                                                                                     |
| cell cycle process                               | 22 | 0.006596 | ITGB1, DCTN6, FHL1, ARL2, NCAPG, PRKCA, VRK1, PDS5B, ACTB, RHOB, BABAM1, ANLN, PCM1, SFPQ, NTMT1, DPF2, JTB, APBB2, PLCB1, PCNT, CLASP1, MAD1L1             |
| inorganic cation transmembrane transport         | 17 | 0.006831 | ITGB1, ATP6V1G1, TRPC5, ANXA2, NDUFB11, TRPC4, ITGB3, FHL1, ATP1B3, WWP2, ATP5F1E, P2RX4, ATP6V0A2, ITGAV, ANXA2P2, ATP5F1EP2, ATP5ME                       |

|                                                        |    |          |                                                                                                                                 |
|--------------------------------------------------------|----|----------|---------------------------------------------------------------------------------------------------------------------------------|
| Ras protein signal transduction                        | 10 | 0.007146 | ITGB1, LRRC59, FLOT1, TIMP2, RAC2, ERBIN, DHCR24, F11R, RTN4, RHOB                                                              |
| regulation of leukocyte cell-cell adhesion             | 11 | 0.007289 | LGALS1, CD81, TNFSF4, RAC2, SIRPA, SCRIB, CD44, MAD1L1, ACTB, ICAM1, TGFBR2                                                     |
| positive regulation of intracellular protein transport | 7  | 0.007596 | BCAP31, PCM1, C2CD5, CD81, RAC2, MFF, PCNT                                                                                      |
| regulation of endocytosis                              | 9  | 0.007607 | ATXN2, CD151, ANXA2, ITGB3, HIP1R, FLOT1, DTNBP1, SIRPA, ITGAV                                                                  |
| inflammatory response                                  | 16 | 0.007939 | ABCC1, GRN, CD40, CD81, F11R, RTN4, ICAM1, LGALS1, FABP4, TNFSF4, PDCD4, SIRPA, CD59, TEK, CD44, MGLL                           |
| carboxylic acid transport                              | 10 | 0.008118 | ITGB1, SLC7A5, ABCC1, P2RX4, FABP4, TRPC4, DTNBP1, SLC38A10, LRRC8D, SERINC3                                                    |
| immune system development                              | 19 | 0.008188 | ITGB1, CD40, RBM15, ANXA2, CD81, ACTN1, PRKCA, ACTB, TGFBR2, BABAM1, ANLN, EXOSC6, LGALS1, TNFSF4, DPF2, TEK, H4C1, LBR, MAD1L1 |
| regulation of cell morphogenesis                       | 12 | 0.008281 | STRIP1, TRPC5, ITGB3, EPB41L3, RAC2, DTNBP1, F11R, CD44, RTN4, RHOB, ICAM1, S100A10                                             |

|                                                                            |    |          |                                                                                                                                                                           |
|----------------------------------------------------------------------------|----|----------|---------------------------------------------------------------------------------------------------------------------------------------------------------------------------|
| organic acid transport                                                     | 10 | 0.008472 | ITGB1, SLC7A5, ABCC1, P2RX4, FABP4, TRPC4, DTNBP1, SLC38A10, LRRRC8D, SERINC3                                                                                             |
| positive regulation of cell-substrate adhesion                             | 6  | 0.008486 | ITGB3, ARL2, TEK, HSD17B12, PPM1F, S100A10                                                                                                                                |
| negative regulation of cellular component organization                     | 17 | 0.008524 | ACVRL1, TRPC5, ANXA2, ITGB3, HIP1R, DTNBP1, F11R, RTN4, SCAF4, ATXN2, LGALS1, WDR5, SIRPA, ITGAV, CLASP1, PFDN6, MAD1L1                                                   |
| cellular response to molecule of bacterial origin                          | 8  | 0.008587 | SLC7A5, CD40, TNFSF4, PDCD4, ADAM9, SIRPA, PRKCA, ICAM1                                                                                                                   |
| regulation of actin filament-based process                                 | 11 | 0.008635 | LIMCH1, ITGB3, HIP1R, RAC2, TEK, F11R, CLASP1, PPM1F, RHOB, ICAM1, S100A10                                                                                                |
| mRNA metabolic process                                                     | 15 | 0.008697 | RBM15, ANXA2, ALYREF, DDX23, USP39, GTPBP1, SCAF4, EXOSC6, SFPQ, SNRPG, NCBP3, SNRPGP15, EXOSC2, BCAS2, S100A10                                                           |
| regulation of protein phosphorylation                                      | 25 | 0.00899  | ACVRL1, CD40, CD81, ITGB3, PPM1F, ACTB, ICAM1, PRRC1, FLOT1, TIMP2, SIRPA, TRPC5, ANXA2, LIMCH1, DTNBP1, PRKCA, TGFBR2, FABP4, PDCD4, JTB, ADAM9, PRKD2, TEK, PLCB1, CD44 |
| positive regulation of production of molecular mediator of immune response | 6  | 0.009018 | SLC7A5, EXOSC6, CD40, CD81, TNFSF4, RTN4                                                                                                                                  |



|                                                                   |    |          |                                                                                                                                                                                                             |
|-------------------------------------------------------------------|----|----------|-------------------------------------------------------------------------------------------------------------------------------------------------------------------------------------------------------------|
| cellular chemical homeostasis                                     | 17 | 0.009158 | BCAP31, ATP6V1G1, GRN, TRPC5, CD40, TRPC4, ITGB3, ATP1B3, RTN4, ICAM1, P2RX4, LGALS1, FTH1, ATP6V0A2, LRRC8D, ITGAV, CKB                                                                                    |
| regulation of production of molecular mediator of immune response | 7  | 0.009243 | SLC7A5, EXOSC6, CD40, CD81, TNFSF4, RTN4, UBE2J1                                                                                                                                                            |
| positive regulation of molecular function                         | 27 | 0.0095   | ITGB1, GRN, CD40, CD81, ITGB3, TOR1AIP2, F11R, PPM1F, ICAM1, BCL2L13, PRRC1, FLOT1, TIMP2, S100A10, BCAP31, ANXA2, HIP1R, SCRIB, ATP1B3, TGFBR2, MYL3, JTB, ADAM9, PRKD2, SERINC1, TEK, CD44                |
| vesicle-mediated transport                                        | 26 | 0.009513 | ITGB1, RAB3B, C2CD5, CD151, CD81, ITGB3, ACTB, ARHGAP12, ATXN2, BLOC1S1, FLOT1, RAC2, SIRPA, BCAP29, ITGAV, CLASP1, S100A10, BCAP31, ANXA2, FNBP1, COG5, HIP1R, DTNBP1, SCRIB, TGFBR2, NPC1                 |
| positive regulation of multicellular organismal process           | 30 | 0.009568 | ACVRL1, ITGB1, GRN, CD40, CD81, ITGB3, F11R, PPM1F, RTN4, ACTB, ICAM1, EXOSC6, BASP1, DPF2, FLOT1, TIMP2, CLASP1, TRPC5, ANXA2, PRKCA, SCRIB, RHOB, TGFBR2, SLC7A5, P2RX4, TNFSF4, ADAM9, PRKD2, TEK, PLCB1 |
| regulation of wound healing                                       | 7  | 0.009949 | ITGB1, ANXA2, PRKCA, F11R, CLASP1, TGFBR2, S100A10                                                                                                                                                          |

|                                                         |    |          |                                                                                                                                                                                                                  |
|---------------------------------------------------------|----|----------|------------------------------------------------------------------------------------------------------------------------------------------------------------------------------------------------------------------|
| positive regulation of cytoskeleton organization        | 8  | 0.01016  | LIMCH1, HIP1R, ARL2, TEK, CLASP1, PPM1F, ICAM1, S100A10                                                                                                                                                          |
| positive regulation of phosphorylation                  | 20 | 0.010295 | ACVRL1, TRPC5, CD40, ANXA2, CD81, LIMCH1, ITGB3, DTNBP1, PRKCA, TGFBR2, ICAM1, PRRC1, FLOT1, TIMP2, ADAM9, JTB, PRKD2, TEK, PLCB1, CD44                                                                          |
| regulation of immune effector process                   | 11 | 0.010314 | SLC7A5, EXOSC6, GRN, CD40, CD81, TNFSF4, RAC2, CD59, SCRIB, RTN4, UBE2J1                                                                                                                                         |
| RNA transport                                           | 7  | 0.010383 | SFPQ, ATXN2, LSG1, ALYREF, FLOT1, NCBP3, TGFBR2                                                                                                                                                                  |
| nucleic acid transport                                  | 7  | 0.010383 | SFPQ, ATXN2, LSG1, ALYREF, FLOT1, NCBP3, TGFBR2                                                                                                                                                                  |
| regulation of small GTPase mediated signal transduction | 9  | 0.010409 | ITGB1, LRRC59, FLOT1, TIMP2, ERBIN, ITGAV, F11R, RTN4, ARHGAP12                                                                                                                                                  |
| positive regulation of intracellular transport          | 8  | 0.010591 | BCAP31, PCM1, C2CD5, ANXA2, CD81, RAC2, MFF, PCNT                                                                                                                                                                |
| cell proliferation                                      | 31 | 0.010655 | ACVRL1, ITGB1, GRN, CD40, CD151, CD81, ITGB3, PDS5B, RTN4, ACTB, BABAM1, PCM1, FTH1, TIMP2, RAC2, ITGAV, TNS2, TRPC5, ANXA2, CNBP, PRKCA, SCRIB, DHCR24, TGFBR2, SLC7A5, TNFSF4, GID8, PDCD4, PRKD2, TEK, MAD1L1 |

|                                                |    |          |                                                                                                                                                                                                                                                                                                                       |
|------------------------------------------------|----|----------|-----------------------------------------------------------------------------------------------------------------------------------------------------------------------------------------------------------------------------------------------------------------------------------------------------------------------|
| establishment of RNA localization              | 7  | 0.01122  | SFPQ, ATXN2, LSG1, ALYREF, FLOT1, NCBP3, TGFBR2                                                                                                                                                                                                                                                                       |
| cell morphogenesis involved in differentiation | 15 | 0.011593 | ITGB1, TRPC5, ITGB3, ACTN1, DTNBP1, SCRIB, RTN4, ACTB, ALCAM, RILPL1, FLOT1, RAC2, ITGAV, TEK, S100A10                                                                                                                                                                                                                |
| regulation of molecular function               | 44 | 0.011821 | ITGB1, GRN, CD40, CD81, ITGB3, FHL1, TOR1AIP2, ARL2, F11R, PPM1F, ACTB, ICAM1, ARHGAP12, BCL2L13, PRRC1, FLOT1, TIMP2, RAC2, SIRPA, ITGAV, S100A10, BCAP31, ANXA2, HIP1R, DTNBP1, ERBIN, SCRIB, ATP1B3, WWP2, DHCR24, TGFBR2, FABP4, TNFSF4, MYL3, PDCD4, JTB, ADAM9, PRKD2, SERINC1, TEK, ANXA2P2, PLCB1, CD44, MYH6 |
| cellular component assembly                    | 43 | 0.011953 | ACVRL1, ITGB1, CD40, ITGB5, NDUFB11, ITGB3, DDX23, ARL2, USP39, F11R, PPM1F, RTN4, ACTB, LMNB1, ICAM1, ATXN2, PCM1, CSRP1, EPB41L3, FLOT1, RAC2, LRRC8D, PIEZO1, H4C1, PCNT, CLASP1, S100A10, ANXA2, LIMCH1, ACTN1, HIP1R, PRKCA, DNAJB14, ANLN, NEMF, RILPL1, SNRPG, ZYX, SNRPGP15, TEK, MYH6, PFDN6, MYH7           |
| cellular homeostasis                           | 18 | 0.01239  | BCAP31, ATP6V1G1, GRN, TRPC5, CD40, TRPC4, ITGB3, ATP1B3, RTN4, ICAM1, P2RX4, LGALS1, FTH1, ATP6V0A2, LRRC8D, ITGAV, CKB, TNS2                                                                                                                                                                                        |

|                                                     |    |          |                                                                                                                                                                                 |
|-----------------------------------------------------|----|----------|---------------------------------------------------------------------------------------------------------------------------------------------------------------------------------|
| regulation of cytoskeleton organization             | 13 | 0.012401 | LIMCH1, ITGB3, HIP1R, ARL2, F11R, PPM1F, RHOB, ICAM1, RAC2, TEK, MPDZ, CLASP1, S100A10                                                                                          |
| positive regulation of wound healing                | 5  | 0.012833 | ITGB1, ANXA2, F11R, TGFBR2, S100A10                                                                                                                                             |
| purine nucleotide metabolic process                 | 12 | 0.01303  | ADSL, NDUFB11, TIMP2, ARL2, ABHD14B, ATP5F1EP2, GTPBP1, DNPH1, MYH6, ATP5F1E, MYH7, ATP5ME                                                                                      |
| regulation of Ras protein signal transduction       | 7  | 0.013069 | ITGB1, LRRC59, FLOT1, TIMP2, ERBIN, F11R, RTN4                                                                                                                                  |
| morphogenesis of an epithelium                      | 12 | 0.013363 | ITGB1, ACVRL1, CD151, RBM15, PRKD2, SCRIB, CD44, CLASP1, ACTB, RHOB, ARHGAP12, TGFBR2                                                                                           |
| organophosphate metabolic process                   | 20 | 0.01375  | PIGS, ADSL, NDUFB11, CD81, DGKA, ABHD14B, ARL2, GTPBP1, DNPH1, ATP5F1E, TIMP2, SERINC1, CKB, TEK, PLCB1, SERINC3, ATP5F1EP2, MYH6, ATP5ME, MYH7                                 |
| regulation of phosphorylation                       | 26 | 0.013866 | ACVRL1, CD40, CD81, ITGB3, ARL2, PPM1F, ACTB, ICAM1, PRRC1, FLOT1, TIMP2, SIRPA, TRPC5, ANXA2, LIMCH1, DTNBP1, PRKCA, TGFBR2, FABP4, PDCD4, JTB, ADAM9, PRKD2, TEK, PLCB1, CD44 |
| positive regulation of protein modification process | 22 | 0.013878 | ACVRL1, TRPC5, CD40, ANXA2, CD81, LIMCH1, ITGB3, DTNBP1, PRKCA, PTTG1IP, TGFBR2, ICAM1, PRRC1, FLOT1, TIMP2, WDR5, ADAM9, JTB, PRKD2, TEK, PLCB1, CD44                          |

|                                      |    |          |                                                                                                                                  |
|--------------------------------------|----|----------|----------------------------------------------------------------------------------------------------------------------------------|
| intracellular protein transport      | 19 | 0.014191 | BCAP31, C2CD5, IPO11, CD81, ALYREF, HM13, ERBIN, PTTG1IP, MFF, RHOB, UBE2J1, LSG1, PCM1, SFPQ, RILPL1, RAC2, BCAP29, NCBP3, PCNT |
| regulation of stress fiber assembly  | 5  | 0.014232 | LIMCH1, F11R, CLASP1, PPM1F, S100A10                                                                                             |
| cellular response to biotic stimulus | 8  | 0.014929 | SLC7A5, CD40, TNFSF4, PDCD4, ADAM9, SIRPA, PRKCA, ICAM1                                                                          |
| apoptotic signaling pathway          | 13 | 0.015291 | BCAP31, HIP1R, PRKCA, PTTG1IP, MFF, PPM1F, ICAM1, SFPQ, P2RX4, DPF2, ITGAV, SERINC3, CD44                                        |
| leukocyte migration                  | 10 | 0.015306 | ITGB1, P2RX4, CD81, ITGB3, RAC2, SIRPA, F11R, PLCB1, RTN4, ICAM1                                                                 |
| regulation of body fluid levels      | 10 | 0.015486 | CD40, CSRP1, ANXA2, DGKA, ITGB3, DTNBP1, CD59, PRKCA, F11R, ACTB                                                                 |
| heart development                    | 13 | 0.015997 | ITGB1, ACVRL1, RBM15, FHL2, RTN4, TGFBR2, BASP1, MYL3, PDCD4, TEK, PDLIM4, MYH6, MYH7                                            |
| mitotic nuclear division             | 9  | 0.016058 | DCTN6, ANLN, DPF2, NCAPG, PDS5B, PCNT, CLASP1, MAD1L1, ACTB                                                                      |

|                                                         |    |          |                                                                                                                                                                                                        |
|---------------------------------------------------------|----|----------|--------------------------------------------------------------------------------------------------------------------------------------------------------------------------------------------------------|
| T cell activation                                       | 12 | 0.016071 | CD151, LGALS1, CD81, TNFSF4, RAC2, SIRPA, SCRIB, CD44, MAD1L1, ACTB, ICAM1, TGFBR2                                                                                                                     |
| purine nucleoside<br>monophosphate metabolic<br>process | 9  | 0.016262 | ADSL, NDUFB11, ARL2, ATP5F1EP2, DNPH1, MYH6, ATP5F1E, MYH7, ATP5ME                                                                                                                                     |
| positive regulation of<br>leukocyte cell-cell adhesion  | 8  | 0.01655  | LGALS1, CD81, TNFSF4, SIRPA, CD44, ACTB, ICAM1, TGFBR2                                                                                                                                                 |
| positive regulation of cellular<br>component biogenesis | 13 | 0.016915 | LIMCH1, HIP1R, ARL2, PRKCA, PPM1F, ICAM1, ANLN, FLOT1, RAC2, PIEZO1, TEK, CLASP1, S100A10                                                                                                              |
| protein phosphorylation                                 | 29 | 0.017335 | ACVRL1, CD40, MAST4, CD81, ITGB3, PPM1F, ACTB, ICAM1, PRRC1, FLOT1, TIMP2, SIRPA, ITGAV, HTATIP2, TRPC5, ANXA2, LIMCH1, DTNBP1, PRKCA, VRK1, TGFBR2, FABP4, PDCD4, JTB, ADAM9, PRKD2, TEK, PLCB1, CD44 |
| inorganic ion transmembrane<br>transport                | 17 | 0.017474 | ITGB1, ATP6V1G1, TRPC5, ANXA2, NDUFB11, TRPC4, ITGB3, FHL1, ATP1B3, WWP2, ATP5F1E, P2RX4, ATP6V0A2, ITGAV, ANXA2P2, ATP5F1EP2, ATP5ME                                                                  |
| cellular response to<br>endogenous stimulus             | 22 | 0.019536 | ITGB1, ACVRL1, ABCC1, C2CD5, ITGB5, CD81, ITGB3, SOGA1, ACTB, TGFBR2, ICAM1, SLC7A5, P2RX4, NPC1, TNFSF4, ZYX, PDCD4, ADAM9, PRKD2, PLCB1, CD44, TNS2                                                  |

|                                                      |    |          |                                                                                                                         |
|------------------------------------------------------|----|----------|-------------------------------------------------------------------------------------------------------------------------|
| regulation of intracellular protein transport        | 8  | 0.019994 | BCAP31, PCM1, C2CD5, CD81, RAC2, MFF, PCNT, UBE2J1                                                                      |
| positive regulation of cellular protein localization | 9  | 0.020211 | BCAP31, ITGB1, PCM1, C2CD5, CD81, RAC2, MFF, PCNT, RTN4                                                                 |
| receptor metabolic process                           | 6  | 0.020429 | ITGB1, ATXN2, ANXA2, CD81, DTNBP1, SCRIB                                                                                |
| hematopoietic or lymphoid organ development          | 17 | 0.020439 | ITGB1, RBM15, ANXA2, CD81, ACTN1, PRKCA, ACTB, TGFBR2, BABAM1, ANLN, LGALS1, TNFSF4, DPF2, TEK, H4C1, LBR, MAD1L1       |
| growth                                               | 17 | 0.020614 | ITGB1, ACVRL1, TRPC5, PLEKHA1, CD81, FHL1, DNPH1, PPM1F, RTN4, TGFBR2, ALCAM, BASP1, EPB41L3, PLCB1, EXOSC2, TNS2, MYH6 |
| receptor internalization                             | 5  | 0.021394 | ITGB1, ATXN2, ANXA2, CD81, DTNBP1                                                                                       |
| regulation of actin filament bundle assembly         | 5  | 0.021394 | LIMCH1, F11R, CLASP1, PPM1F, S100A10                                                                                    |
| positive regulation of epithelial cell proliferation | 7  | 0.021425 | ACVRL1, GRN, ITGB3, PRKD2, PRKCA, TEK, RTN4                                                                             |
| leukocyte activation involved in immune response     | 8  | 0.021434 | EXOSC6, GRN, CD40, LGALS1, CD81, TNFSF4, RAC2, ICAM1                                                                    |

|                                                                |    |          |                                                                                                                                                                                                          |
|----------------------------------------------------------------|----|----------|----------------------------------------------------------------------------------------------------------------------------------------------------------------------------------------------------------|
| purine-containing compound<br>metabolic process                | 12 | 0.021474 | ADSL, NDUFB11, TIMP2, ARL2, ABHD14B, ATP5F1EP2, GTPBP1,<br>DNPH1, MYH6, ATP5F1E, MYH7, ATP5ME                                                                                                            |
| cell cycle                                                     | 26 | 0.02153  | ITGB1, DCTN6, FHL1, ARL2, NCAPG, PDS5B, USP39, ACTB,<br>BABAM1, PCM1, NTMT1, DPF2, TIMP2, APBB2, PCNT, CLASP1,<br>PRKCA, VRK1, SCRIB, RHOB, ANLN, SFPQ, PDCD4, JTB, PLCB1,<br>MAD1L1                     |
| establishment of protein<br>localization                       | 28 | 0.021662 | RAB3B, C2CD5, IPO11, CD81, HM13, PTTG1IP, MFF, PPM1F, UBE2J1,<br>PCM1, RAC2, BCAP29, PCNT, BCAP31, PLEKHA1, COG5, ALYREF,<br>ERBIN, SCRIB, WWP2, RHOB, SFPQ, DNAJC1, LSG1, NPC1, RILPL1,<br>ADAM9, NCBP3 |
| protein folding                                                | 7  | 0.021763 | GRN, DNAJC1, ARL2, MOGS, DNAJB14, SDF2, PFDN6                                                                                                                                                            |
| positive regulation of<br>supramolecular fiber<br>organization | 7  | 0.021763 | LIMCH1, HIP1R, ARL2, CLASP1, PPM1F, ICAM1, S100A10                                                                                                                                                       |
| transmembrane transport                                        | 24 | 0.021793 | ITGB1, ABCC1, ATP6V1G1, C2CD5, TRPC5, ANXA2, NDUFB11,<br>TRPC4, ITGB3, FHL1, SLC38A10, ATP1B3, WWP2, ATP5F1E, ACTB,<br>SLC7A5, P2RX4, ATP6V0A2, LRRC8D, PIEZO1, ITGAV, ANXA2P2,<br>ATP5F1EP2, ATP5ME     |



|                                              |    |          |                                                                                                                                                                                                                                                                                                         |
|----------------------------------------------|----|----------|---------------------------------------------------------------------------------------------------------------------------------------------------------------------------------------------------------------------------------------------------------------------------------------------------------|
| regulation of signal transduction            | 42 | 0.022095 | ACVRL1, ITGB1, LRRC59, CD40, CD81, ITGB3, FHL2, PTTG1IP, F11R, MFF, RTN4, ICAM1, ARHGAP12, LGALS1, TNFAIP8L1, FLOT1, TIMP2, SIRPA, ITGAV, TNS2, BCAP31, PLEKHA1, CMTM3, ANXA2, HIP1R, DTNBP1, ERBIN, PRKCA, SCRIB, WWP2, TGFB2, SFPQ, P2RX4, GID8, PDCD4, ADAM9, PRKD2, TEK, PLCB1, SERINC3, CD44, MGLL |
| protein processing                           | 8  | 0.022129 | BACE2, ANXA2, HM13, ADAM9, MOGS, DHCR24, CD59, S100A10                                                                                                                                                                                                                                                  |
| organic anion transport                      | 11 | 0.022677 | ITGB1, SLC7A5, ABCC1, P2RX4, FABP4, NPC2, TRPC4, DTNBP1, SLC38A10, LRRC8D, SERINC3                                                                                                                                                                                                                      |
| cell activation involved in immune response  | 8  | 0.022848 | EXOSC6, GRN, CD40, LGALS1, CD81, TNFSF4, RAC2, ICAM1                                                                                                                                                                                                                                                    |
| positive regulation of inflammatory response | 6  | 0.022922 | ABCC1, LGALS1, FABP4, CD81, TNFSF4, PDCD4                                                                                                                                                                                                                                                               |
| regulation of intracellular transport        | 11 | 0.022948 | BCAP31, PCM1, C2CD5, REEP5, ANXA2, CD81, RAC2, DTNBP1, MFF, PCNT, UBE2J1                                                                                                                                                                                                                                |
| regulation of protein transport              | 12 | 0.023714 | BCAP31, PCM1, C2CD5, DNAJC1, CD81, RAC2, ADAM9, WWP2, MFF, PCNT, PPM1F, UBE2J1                                                                                                                                                                                                                          |
| negative regulation of cell differentiation  | 15 | 0.023829 | ITGB1, ACVRL1, TRPC5, RBM15, ITGB3, DTNBP1, RTN4, ACTB, PCM1, LGALS1, TNFSF4, PDCD4, DPF2, ITGAV, H4C1                                                                                                                                                                                                  |

|                                                        |    |          |                                                                                                                                                                                                                                                                                                                                       |
|--------------------------------------------------------|----|----------|---------------------------------------------------------------------------------------------------------------------------------------------------------------------------------------------------------------------------------------------------------------------------------------------------------------------------------------|
| response to external stimulus                          | 37 | 0.024009 | GRN, CD40, CD81, ITGB3, F11R, PPM1F, ICAM1, ALCAM, LGALS1, RAC2, SIRPA, PIEZO1, RBBP9, CD59, ITGAV, CLASP1, ABCC1, ADSL, CMTM3, ANXA2, ERBIN, PRKCA, SCRIB, TGFBR2, SLC7A5, P2RX4, FABP4, NPC2, TNFSF4, ZYX, PDCD4, ADAM9, PRKD2, NCBP3, TEK, SERINC3, MGLL                                                                           |
| positive regulation of phosphate metabolic process     | 20 | 0.024608 | ACVRL1, TRPC5, CD40, ANXA2, CD81, LIMCH1, ITGB3, DTNBP1, PRKCA, TGFBR2, ICAM1, PRRC1, FLOT1, TIMP2, ADAM9, JTB, PRKD2, TEK, PLCB1, CD44                                                                                                                                                                                               |
| positive regulation of phosphorus metabolic process    | 20 | 0.024608 | ACVRL1, TRPC5, CD40, ANXA2, CD81, LIMCH1, ITGB3, DTNBP1, PRKCA, TGFBR2, ICAM1, PRRC1, FLOT1, TIMP2, ADAM9, JTB, PRKD2, TEK, PLCB1, CD44                                                                                                                                                                                               |
| positive regulation of endothelial cell proliferation  | 5  | 0.024642 | ACVRL1, ITGB3, PRKD2, PRKCA, TEK                                                                                                                                                                                                                                                                                                      |
| positive regulation of macromolecule metabolic process | 46 | 0.024948 | ACVRL1, GRN, CD40, CD81, ITGB3, PTTG1IP, PPM1F, ACTB, ICAM1, BABAM1, BCL2L13, EXOSC6, PRRC1, WDR5, DPF2, FLOT1, TIMP2, RBBP9, APBB2, S100A10, HTATIP2, BCAP31, TRPC5, RBM15, ANXA2, LIMCH1, CNBP, ALYREF, ACTN1, HIP1R, DTNBP1, ABHD14B, PRKCA, SCRIB, WWP2, GTPBP1, TGFBR2, DRAP1, SFPQ, TNFSF4, JTB, ADAM9, PRKD2, TEK, PLCB1, CD44 |

|                                                |    |          |                                                                                                                                                                                                                                                                                                                                                                                                                                                                                                                      |
|------------------------------------------------|----|----------|----------------------------------------------------------------------------------------------------------------------------------------------------------------------------------------------------------------------------------------------------------------------------------------------------------------------------------------------------------------------------------------------------------------------------------------------------------------------------------------------------------------------|
| mitochondrial transport                        | 8  | 0.02514  | BCAP31, NDUFB11, HIP1R, RAC2, MFF, ATP5F1EP2, ATP5F1E, ATP5ME                                                                                                                                                                                                                                                                                                                                                                                                                                                        |
| negative regulation of biological process      | 71 | 0.025467 | ACVRL1, ITGB1, ITGB3, FHL1, FHL2, F11R, SOGA1, ACTB, ICAM1, BABAM1, PCM1, LGALS1, BASP1, FTH1, TIMP2, TNFAIP8L1, WDR5, DPF2, SIRPA, ITGAV, H4C1, TNS2, HTATIP2, TRPC5, RBM15, ANXA2, LIMCH1, ACTN1, PRKCA, SCRIB, GTPBP1, RHOB, TGFBR2, SLC7A5, BACE2, SFPQ, DNAJC1, NPC1, PLCB1, MAD1L1, CD44, PFDN6, GRN, ARL2, PDS5B, PTTG1IP, PPM1F, RTN4, UBE2J1, ARHGAP12, EXOSC6, ATXN2, APBB2, CD59, EXOSC2, CLASP1, PLEKHA1, CNBP, HIP1R, DTNBP1, ERBIN, WWP2, DHCR24, HELZ, SCAF4, DRAP1, P2RX4, FABP4, TNFSF4, PDCD4, TEK |
| regulation of leukocyte migration              | 7  | 0.025556 | P2RX4, CD81, ITGB3, RAC2, PLCB1, RTN4, ICAM1                                                                                                                                                                                                                                                                                                                                                                                                                                                                         |
| MAPK cascade                                   | 15 | 0.025605 | CD40, CD81, ITGB3, DTNBP1, PRKCA, ICAM1, TIMP2, PDCD4, ADAM9, SIRPA, ITGAV, PRKD2, TEK, PLCB1, CD44                                                                                                                                                                                                                                                                                                                                                                                                                  |
| signal transduction by protein phosphorylation | 15 | 0.025605 | CD40, CD81, ITGB3, DTNBP1, PRKCA, ICAM1, TIMP2, PDCD4, ADAM9, SIRPA, ITGAV, PRKD2, TEK, PLCB1, CD44                                                                                                                                                                                                                                                                                                                                                                                                                  |
| regulation of cell activation                  | 14 | 0.025825 | GRN, CD40, CD81, PRKCA, SCRIB, F11R, ACTB, TGFBR2, EXOSC6, LGALS1, TNFSF4, RAC2, SIRPA, MAD1L1                                                                                                                                                                                                                                                                                                                                                                                                                       |

|                                                  |    |          |                                                                                                                                                                                         |
|--------------------------------------------------|----|----------|-----------------------------------------------------------------------------------------------------------------------------------------------------------------------------------------|
| peptide transport                                | 27 | 0.0259   | RAB3B, C2CD5, IPO11, CD81, HM13, PTTG1IP, MFF, PPM1F, UBE2J1, PCM1, RAC2, BCAP29, PCNT, BCAP31, ABCC1, COG5, ALYREF, ERBIN, SCRIB, WWP2, RHOB, SFPQ, DNAJC1, LSG1, RILPL1, ADAM9, NCBP3 |
| carbohydrate derivative<br>metabolic process     | 20 | 0.026073 | PIGS, ADSL, NDUFB11, ABHD14B, ARL2, MOGS, GTPBP1, DNPH1, ATP5F1E, UBE2J1, BACE2, NPC1, AMDHD2, TIMP2, PLCB1, ATP5F1EP2, CD44, MYH6, ATP5ME, MYH7                                        |
| response to lipopolysaccharide                   | 9  | 0.026104 | SLC7A5, CD40, TNFSF4, PDCD4, ERBIN, ADAM9, SIRPA, PRKCA, ICAM1                                                                                                                          |
| striated muscle cell<br>differentiation          | 8  | 0.026311 | ITGB1, CSRP1, CD81, FHL2, FLOT1, PIEZO1, MYH6, MYH7                                                                                                                                     |
| regulation of cellular protein<br>localization   | 12 | 0.026399 | BCAP31, ITGB1, PCM1, C2CD5, CD81, RAC2, MFF, PCNT, RTN4, ACTB, PPM1F, UBE2J1                                                                                                            |
| nucleoside monophosphate<br>metabolic process    | 9  | 0.026522 | ADSL, NDUFB11, ARL2, ATP5F1EP2, DNPH1, MYH6, ATP5F1E, MYH7, ATP5ME                                                                                                                      |
| establishment or maintenance<br>of cell polarity | 7  | 0.026582 | ITGB1, RAC2, ERBIN, SCRIB, CLASP1, ACTB, RHOB                                                                                                                                           |

|                                                               |    |          |                                                                                                                        |
|---------------------------------------------------------------|----|----------|------------------------------------------------------------------------------------------------------------------------|
| regulation of cytokine production involved in immune response | 5  | 0.026726 | SLC7A5, CD81, TNFSF4, RTN4, UBE2J1                                                                                     |
| regulation of neurotransmitter transport                      | 5  | 0.026726 | ITGB1, RAB3B, ITGB3, FLOT1, DTNBP1                                                                                     |
| cytokine production involved in immune response               | 5  | 0.026726 | SLC7A5, CD81, TNFSF4, RTN4, UBE2J1                                                                                     |
| regulation of catabolic process                               | 16 | 0.026926 | ITGB1, BCAP31, ATP6V1G1, ANXA2, CD81, ARL2, WWP2, PTTG1IP, SOGA1, GTPBP1, UBE2J1, SLC7A5, NPC1, TIMP2, ATP6V0A2, ADAM9 |
| purine ribonucleotide metabolic process                       | 11 | 0.026985 | ADSL, NDUFB11, TIMP2, ARL2, ABHD14B, ATP5F1EP2, GTPBP1, MYH6, ATP5F1E, MYH7, ATP5ME                                    |
| regulation of T cell activation                               | 9  | 0.028407 | LGALS1, CD81, TNFSF4, RAC2, SIRPA, SCRIB, MAD1L1, ACTB, TGFBR2                                                         |
| hemopoiesis                                                   | 16 | 0.028539 | ITGB1, RBM15, ANXA2, CD81, ACTN1, PRKCA, ACTB, TGFBR2, BABAM1, ANLN, LGALS1, TNFSF4, DPF2, TEK, H4C1, LBR              |
| regulation of MAPK cascade                                    | 14 | 0.028854 | CD40, CD81, ITGB3, DTNBP1, PRKCA, ICAM1, TIMP2, PDCD4, ADAM9, SIRPA, PRKD2, TEK, PLCB1, CD44                           |

|                                                   |    |          |                                                                                                                                                                                                                                                                                                                                       |
|---------------------------------------------------|----|----------|---------------------------------------------------------------------------------------------------------------------------------------------------------------------------------------------------------------------------------------------------------------------------------------------------------------------------------------|
| regulation of lymphocyte proliferation            | 7  | 0.029044 | CD40, CD81, TNFSF4, RAC2, SCRIB, MAD1L1, TGFBR2                                                                                                                                                                                                                                                                                       |
| homeostatic process                               | 28 | 0.029598 | GRN, CD40, ITGB3, FHL1, RTN4, ACTB, ICAM1, LGALS1, FTH1, RAC2, ATP6V0A2, LRRC8D, APBB2, ITGAV, CKB, TNS2, BCAP31, ATP6V1G1, TRPC5, TRPC4, CNBP, PRKCA, ATP1B3, BACE2, P2RX4, FABP4, NPC1, NPC2                                                                                                                                        |
| endothelial cell differentiation                  | 5  | 0.029665 | ACVRL1, F11R, PLCB1, RTN4, ICAM1                                                                                                                                                                                                                                                                                                      |
| positive regulation of cellular metabolic process | 46 | 0.029748 | ACVRL1, GRN, CD40, CD81, ITGB3, PTTG1IP, PPM1F, ACTB, ICAM1, BABAM1, BCL2L13, EXOSC6, PRRC1, WDR5, DPF2, FLOT1, TIMP2, APBB2, S100A10, HTATIP2, BCAP31, TRPC5, RBM15, ANXA2, LIMCH1, CNBP, ALYREF, ACTN1, HIP1R, DTNBP1, ABHD14B, PRKCA, SCRIB, WWP2, GTPBP1, TGFBR2, DRAP1, SFPQ, P2RX4, TNFSF4, JTB, ADAM9, PRKD2, TEK, PLCB1, CD44 |
| response to oxygen levels                         | 9  | 0.029836 | ACVRL1, SLC7A5, ATP6V1G1, ADSL, ATP6V0A2, TEK, RTN4, ICAM1, TGFBR2                                                                                                                                                                                                                                                                    |
| lymphocyte proliferation                          | 8  | 0.030214 | CD40, CD151, CD81, TNFSF4, RAC2, SCRIB, MAD1L1, TGFBR2                                                                                                                                                                                                                                                                                |
| peptidyl-threonine phosphorylation                | 5  | 0.030428 | TRPC5, VRK1, PRKD2, PRKCA, TGFBR2                                                                                                                                                                                                                                                                                                     |

|                                                     |    |          |                                                                                                                                                                                                      |
|-----------------------------------------------------|----|----------|------------------------------------------------------------------------------------------------------------------------------------------------------------------------------------------------------|
| regulation of protein localization                  | 16 | 0.030966 | ITGB1, BCAP31, C2CD5, CD81, ITGB3, WWP2, MFF, PPM1F, RTN4, ACTB, UBE2J1, PCM1, DNAJC1, RAC2, ADAM9, PCNT                                                                                             |
| regulation of mononuclear cell proliferation        | 7  | 0.031108 | CD40, CD81, TNFSF4, RAC2, SCRIB, MAD1L1, TGFBR2                                                                                                                                                      |
| nucleobase-containing compound transport            | 7  | 0.031108 | SFPQ, ATXN2, LSG1, ALYREF, FLOT1, NCBP3, TGFBR2                                                                                                                                                      |
| protein transport                                   | 26 | 0.03128  | RAB3B, C2CD5, IPO11, CD81, HM13, PTTG1IP, MFF, PPM1F, UBE2J1, PCM1, RAC2, BCAP29, PCNT, BCAP31, COG5, ALYREF, ERBIN, SCRIB, WWP2, RHOB, SFPQ, DNAJC1, LSG1, RILPL1, ADAM9, NCBP3                     |
| regulation of cell differentiation                  | 28 | 0.031634 | ACVRL1, ITGB1, GRN, ITGB3, F11R, RTN4, ACTB, PCM1, LGALS1, DPF2, FLOT1, TIMP2, PIEZO1, ITGAV, H4C1, CLASP1, S100A10, TRPC5, RBM15, ANXA2, DTNBP1, PRKCA, TGFBR2, SLC7A5, P2RX4, TNFSF4, PDCD4, PLCB1 |
| regulation of establishment of protein localization | 12 | 0.032098 | BCAP31, PCM1, C2CD5, DNAJC1, CD81, RAC2, ADAM9, WWP2, MFF, PCNT, PPM1F, UBE2J1                                                                                                                       |
| regulation of T cell proliferation                  | 6  | 0.032367 | CD81, TNFSF4, RAC2, SCRIB, MAD1L1, TGFBR2                                                                                                                                                            |
| mononuclear cell proliferation                      | 8  | 0.032381 | CD40, CD151, CD81, TNFSF4, RAC2, SCRIB, MAD1L1, TGFBR2                                                                                                                                               |

|                                          |    |          |                                                                                                                                                                                         |
|------------------------------------------|----|----------|-----------------------------------------------------------------------------------------------------------------------------------------------------------------------------------------|
| amide transport                          | 27 | 0.032399 | RAB3B, C2CD5, IPO11, CD81, HM13, PTTG1IP, MFF, PPM1F, UBE2J1, PCM1, RAC2, BCAP29, PCNT, BCAP31, ABCC1, COG5, ALYREF, ERBIN, SCRIB, WWP2, RHOB, SFPQ, DNAJC1, LSG1, RILPL1, ADAM9, NCBP3 |
| regulation of cytokine production        | 15 | 0.032604 | CD40, CD81, ERBIN, SCRIB, F11R, RTN4, UBE2J1, SLC7A5, TNFSF4, FLOT1, PDCD4, SIRPA, ITGAV, PRKD2, PLCB1                                                                                  |
| ribonucleotide metabolic process         | 11 | 0.033245 | ADSL, NDUFB11, TIMP2, ARL2, ABHD14B, ATP5F1EP2, GTPBP1, MYH6, ATP5F1E, MYH7, ATP5ME                                                                                                     |
| cardiac ventricle development            | 5  | 0.033597 | RBM15, MYL3, MYH6, MYH7, TGFBR2                                                                                                                                                         |
| regulation of peptide transport          | 12 | 0.034067 | BCAP31, PCM1, C2CD5, DNAJC1, CD81, RAC2, ADAM9, WWP2, MFF, PCNT, PPM1F, UBE2J1                                                                                                          |
| response to molecule of bacterial origin | 9  | 0.034221 | SLC7A5, CD40, TNFSF4, PDCD4, ERBIN, ADAM9, SIRPA, PRKCA, ICAM1                                                                                                                          |
| positive regulation of MAPK cascade      | 11 | 0.03432  | CD40, CD81, ITGB3, TIMP2, ADAM9, PRKD2, PRKCA, TEK, PLCB1, CD44, ICAM1                                                                                                                  |
| hydrogen ion transmembrane transport     | 6  | 0.034526 | ATP6V1G1, NDUFB11, ATP6V0A2, ATP5F1EP2, ATP5F1E, ATP5ME                                                                                                                                 |



|                                                                        |    |          |                                                                                                                                                                                                                                                                                                                  |
|------------------------------------------------------------------------|----|----------|------------------------------------------------------------------------------------------------------------------------------------------------------------------------------------------------------------------------------------------------------------------------------------------------------------------|
| transmembrane receptor<br>protein tyrosine kinase<br>signaling pathway | 12 | 0.036121 | C2CD5, PLEKHA1, ITGB3, HIP1R, ERBIN, PRKD2, CLEC14A, TEK, PLCB1, SOGA1, RTN4, TNS2                                                                                                                                                                                                                               |
| cellular response to oxygen-<br>containing compound                    | 19 | 0.036644 | ABCC1, C2CD5, CD40, PLEKHA1, ITGB3, PRKCA, SOGA1, ACTB, RHOB, ICAM1, SLC7A5, P2RX4, LGALS1, TNFSF4, PDCD4, ADAM9, SIRPA, PLCB1, TNS2                                                                                                                                                                             |
| purine nucleoside<br>monophosphate biosynthetic<br>process             | 5  | 0.036952 | ADSL, NDUFB11, ATP5F1EP2, ATP5F1E, ATP5ME                                                                                                                                                                                                                                                                        |
| purine ribonucleoside<br>monophosphate biosynthetic<br>process         | 5  | 0.036952 | ADSL, NDUFB11, ATP5F1EP2, ATP5F1E, ATP5ME                                                                                                                                                                                                                                                                        |
| regulation of protein metabolic<br>process                             | 44 | 0.037017 | ACVRL1, GRN, CD40, CD81, ITGB3, PTTG1IP, PPM1F, RTN4, ACTB, UBE2J1, ICAM1, BCL2L13, ATXN2, PRRC1, WDR5, FLOT1, TIMP2, SIRPA, CD59, ITGAV, S100A10, BCAP31, TRPC5, ANXA2, LIMCH1, CNBP, HIP1R, DTNBP1, PRKCA, WWP2, DHCR24, TGFBR2, BACE2, DNAJC1, FABP4, NEMF, PDCD4, JTB, ADAM9, PRKD2, TEK, PLCB1, CD44, PFDN6 |
| purine ribonucleoside<br>triphosphate metabolic process                | 8  | 0.037286 | NDUFB11, ARL2, ATP5F1EP2, GTPBP1, MYH6, ATP5F1E, MYH7, ATP5ME                                                                                                                                                                                                                                                    |

|                                                 |    |          |                                                                                                                                                                                                                         |
|-------------------------------------------------|----|----------|-------------------------------------------------------------------------------------------------------------------------------------------------------------------------------------------------------------------------|
| lymphocyte activation                           | 15 | 0.037483 | ITGB1, CD40, CD151, CD81, SCRIB, ACTB, TGFBR2, ICAM1, EXOSC6, LGALS1, TNFSF4, RAC2, SIRPA, CD44, MAD1L1                                                                                                                 |
| leukocyte activation                            | 17 | 0.037635 | ITGB1, GRN, CD40, CD151, CD81, SCRIB, ACTB, TGFBR2, ICAM1, EXOSC6, LGALS1, TNFSF4, RAC2, ADAM9, SIRPA, CD44, MAD1L1                                                                                                     |
| ERK1 and ERK2 cascade                           | 8  | 0.03781  | ITGB3, SIRPA, ITGAV, PRKD2, PRKCA, TEK, CD44, ICAM1                                                                                                                                                                     |
| peptidyl-threonine modification                 | 5  | 0.03782  | TRPC5, VRK1, PRKD2, PRKCA, TGFBR2                                                                                                                                                                                       |
| muscle cell development                         | 6  | 0.037868 | ITGB1, CSRP1, ACTN1, FHL2, MYH6, MYH7                                                                                                                                                                                   |
| phosphorylation                                 | 32 | 0.038153 | ACVRL1, CD40, MAST4, CD81, DGKA, ITGB3, ARL2, PPM1F, ACTB, ICAM1, PRRC1, FLOT1, TIMP2, SIRPA, ITGAV, CKB, HTATIP2, TRPC5, ANXA2, LIMCH1, DTNBP1, PRKCA, VRK1, TGFBR2, FABP4, PDCD4, JTB, ADAM9, PRKD2, TEK, PLCB1, CD44 |
| cellular ion homeostasis                        | 13 | 0.038273 | BCAP31, ATP6V1G1, GRN, TRPC5, CD40, TRPC4, ITGB3, ATP1B3, P2RX4, FTH1, ATP6V0A2, ITGAV, CKB                                                                                                                             |
| regulation of DNA recombination                 | 5  | 0.038699 | EXOSC6, CD40, TNFSF4, ALYREF, ACTB                                                                                                                                                                                      |
| RNA splicing, via transesterification reactions | 8  | 0.039288 | SFPQ, RBM15, ALYREF, DDX23, SNRPG, SNRPGP15, USP39, BCAS2                                                                                                                                                               |

|                                                  |    |          |                                                                                                                                                                                                                                                       |
|--------------------------------------------------|----|----------|-------------------------------------------------------------------------------------------------------------------------------------------------------------------------------------------------------------------------------------------------------|
| with bulged adenosine as nucleophile             |    |          |                                                                                                                                                                                                                                                       |
| mRNA splicing, via spliceosome                   | 8  | 0.039288 | SFPQ, RBM15, ALYREF, DDX23, SNRPG, SNRPGP15, USP39, BCAS2                                                                                                                                                                                             |
| purine nucleoside triphosphate metabolic process | 8  | 0.039968 | NDUFB11, ARL2, ATP5F1EP2, GTPBP1, MYH6, ATP5F1E, MYH7, ATP5ME                                                                                                                                                                                         |
| ribose phosphate metabolic process               | 11 | 0.04006  | ADSL, NDUFB11, TIMP2, ARL2, ABHD14B, ATP5F1EP2, GTPBP1, MYH6, ATP5F1E, MYH7, ATP5ME                                                                                                                                                                   |
| catabolic process                                | 34 | 0.040478 | ITGB1, CD81, TEX264, POP1, HM13, ARL2, PTTG1IP, DNPH1, SOGA1, UBE2J1, EXOSC6, AMDHD2, TIMP2, ATP6V0A2, MAN2C1, EXOSC2, BCAP31, ABCC1, ATP6V1G1, ANXA2, UBE2E1, LNPEP, DNAJB14, WWP2, GTPBP1, SLC7A5, NPC1, NEMF, GID8, PCCB, ADAM9, PLCB1, CD44, MGLL |
| ribonucleoside triphosphate metabolic process    | 8  | 0.040971 | NDUFB11, ARL2, ATP5F1EP2, GTPBP1, MYH6, ATP5F1E, MYH7, ATP5ME                                                                                                                                                                                         |
| cellular response to chemical stimulus           | 40 | 0.041027 | ACVRL1, ITGB1, C2CD5, CD40, ITGB5, CD81, ITGB3, SOGA1, PPM1F, RTN4, ACTB, ICAM1, LGALS1, FLOT1, RAC2, ATP6V0A2, SIRPA, TNS2, ABCC1, ATP6V1G1, RBM15, PLEKHA1, ERBIN, PRKCA,                                                                           |

|                                                 |    |          |                                                                                                              |
|-------------------------------------------------|----|----------|--------------------------------------------------------------------------------------------------------------|
|                                                 |    |          | DNAJB14, CMBL, RHOB, TGFBR2, SLC7A5, SFPQ, P2RX4, FABP4, NPC1, TNFSF4, ZYX, PDCD4, ADAM9, PRKD2, PLCB1, CD44 |
| positive regulation of protein transport        | 8  | 0.041523 | BCAP31, PCM1, C2CD5, CD81, RAC2, ADAM9, MFF, PCNT                                                            |
| RNA splicing, via transesterification reactions | 8  | 0.041523 | SFPQ, RBM15, ALYREF, DDX23, SNRPG, SNRPGP15, USP39, BCAS2                                                    |
| regulation of apoptotic signaling pathway       | 9  | 0.041752 | BCAP31, SFPQ, HIP1R, ITGAV, PTTG1IP, MFF, SERINC3, CD44, ICAM1                                               |
| regulation of supramolecular fiber organization | 9  | 0.041752 | LIMCH1, HIP1R, ARL2, F11R, CLASP1, PFDN6, PPM1F, ICAM1, S100A10                                              |
| regulation of leukocyte proliferation           | 7  | 0.041966 | CD40, CD81, TNFSF4, RAC2, SCRIB, MAD1L1, TGFBR2                                                              |
| organelle fission                               | 11 | 0.042112 | DCTN6, ANLN, DPF2, NCAPG, PDS5B, MFF, PLCB1, PCNT, CLASP1, MAD1L1, ACTB                                      |
| positive regulation of immune effector process  | 7  | 0.042617 | SLC7A5, EXOSC6, CD40, CD81, TNFSF4, RAC2, RTN4                                                               |

|                                                       |    |          |                                                                                                                                                                                                                                                                                                                                                                                                                                                                           |
|-------------------------------------------------------|----|----------|---------------------------------------------------------------------------------------------------------------------------------------------------------------------------------------------------------------------------------------------------------------------------------------------------------------------------------------------------------------------------------------------------------------------------------------------------------------------------|
| regulation of phosphate metabolic process             | 26 | 0.042945 | ACVRL1, CD40, CD81, ITGB3, ARL2, PPM1F, ACTB, ICAM1, PRRC1, FLOT1, TIMP2, SIRPA, TRPC5, ANXA2, LIMCH1, DTNBP1, PRKCA, TGFBR2, FABP4, PDCD4, JTB, ADAM9, PRKD2, TEK, PLCB1, CD44                                                                                                                                                                                                                                                                                           |
| purine ribonucleoside monophosphate metabolic process | 8  | 0.04374  | ADSL, NDUFB11, ARL2, ATP5F1EP2, MYH6, ATP5F1E, MYH7, ATP5ME                                                                                                                                                                                                                                                                                                                                                                                                               |
| regulation of phosphorus metabolic process            | 26 | 0.044105 | ACVRL1, CD40, CD81, ITGB3, ARL2, PPM1F, ACTB, ICAM1, PRRC1, FLOT1, TIMP2, SIRPA, TRPC5, ANXA2, LIMCH1, DTNBP1, PRKCA, TGFBR2, FABP4, PDCD4, JTB, ADAM9, PRKD2, TEK, PLCB1, CD44                                                                                                                                                                                                                                                                                           |
| response to hormone                                   | 15 | 0.044894 | C2CD5, ANXA2, ITGB3, FHL2, DHCR24, SOGA1, TGFBR2, ICAM1, NPC1, TNFSF4, TIMP2, ADAM9, TEK, PLCB1, TNS2                                                                                                                                                                                                                                                                                                                                                                     |
| negative regulation of cellular process               | 65 | 0.045308 | ACVRL1, ITGB1, ITGB3, FHL1, FHL2, F11R, SOGA1, ACTB, ICAM1, BABAM1, PCM1, LGALS1, BASP1, FTH1, TIMP2, TNFAIP8L1, WDR5, DPF2, SIRPA, ITGAV, H4C1, TNS2, HTATIP2, TRPC5, RBM15, ANXA2, LIMCH1, ACTN1, PRKCA, SCRIB, RHOB, TGFBR2, SLC7A5, BACE2, SFPQ, DNAJC1, NPC1, PLCB1, MAD1L1, CD44, PFDN6, GRN, PDS5B, PTTG1IP, PPM1F, RTN4, UBE2J1, ARHGAP12, ATXN2, APBB2, CD59, CLASP1, PLEKHA1, CNBP, HIP1R, DTNBP1, ERBIN, WWP2, DHCR24, SCAF4, DRAP1, FABP4, TNFSF4, PDCD4, TEK |

|                                                      |    |          |                                                                                                                                                                                          |
|------------------------------------------------------|----|----------|------------------------------------------------------------------------------------------------------------------------------------------------------------------------------------------|
| lymphocyte activation<br>involved in immune response | 6  | 0.045353 | EXOSC6, CD40, LGALS1, CD81, TNFSF4, ICAM1                                                                                                                                                |
| protein maturation                                   | 8  | 0.045494 | BACE2, ANXA2, HM13, ADAM9, MOGS, DHCR24, CD59, S100A10                                                                                                                                   |
| regulation of immune response                        | 16 | 0.045762 | GRN, CD40, PLEKHA1, CMTM3, CD81, ERBIN, RTN4, UBE2J1, SLC7A5, EXOSC6, SFPQ, TNFSF4, FLOT1, RAC2, CD59, PRKD2                                                                             |
| negative regulation of<br>developmental process      | 18 | 0.047134 | ITGB1, ACVRL1, TRPC5, RBM15, ITGB3, DTNBP1, RTN4, ACTB, TGFBR2, PCM1, LGALS1, TNFSF4, PDCD4, DPF2, ITGAV, TEK, H4C1, CLASP1                                                              |
| T cell proliferation                                 | 6  | 0.047737 | CD151, CD81, TNFSF4, SCRIB, MAD1L1, TGFBR2                                                                                                                                               |
| peptidyl-serine modification                         | 8  | 0.04787  | MAST4, NTMT1, VRK1, PRKD2, PRKCA, CD44, PPM1F, TGFBR2                                                                                                                                    |
| leukocyte proliferation                              | 8  | 0.04787  | CD40, CD151, CD81, TNFSF4, RAC2, SCRIB, MAD1L1, TGFBR2                                                                                                                                   |
| nucleus organization                                 | 5  | 0.048054 | TOR1AIP2, VRK1, PRKCA, RTN4, LMNB1                                                                                                                                                       |
| epithelial cell apoptotic<br>process                 | 5  | 0.049142 | CD40, PDCD4, TEK, ICAM1, TGFBR2                                                                                                                                                          |
| regulation of protein<br>modification process        | 27 | 0.049307 | ACVRL1, CD40, CD81, ITGB3, PTTG1IP, PPM1F, ACTB, ICAM1, PRRC1, WDR5, FLOT1, TIMP2, SIRPA, TRPC5, ANXA2, LIMCH1, DTNBP1, PRKCA, TGFBR2, FABP4, PDCD4, JTB, ADAM9, PRKD2, TEK, PLCB1, CD44 |

|                                                 |              |                |                                                           |
|-------------------------------------------------|--------------|----------------|-----------------------------------------------------------|
| positive regulation of growth                   | 7            | 0.049972       | TRPC5, BASP1, PLCB1, EXOSC2, DNPH1, PPM1F, TGFBR2         |
| <b>Pathway</b>                                  | <b>Count</b> | <b>P Value</b> | <b>Genes</b>                                              |
| Adrenergic signaling in cardiomyocytes          | 6            | 0.028093       | MYL3, ATP1B3, PRKCA, PLCB1, MYH6, MYH7                    |
| Arrhythmogenic right ventricular cardiomyopathy | 5            | 0.011379       | ITGB1, ITGB5, ITGB3, ITGAV, ACTB                          |
| Cell adhesion molecules                         | 7            | 0.008903       | ITGB1, CD40, ALCAM, ICAM2, ITGAV, F11R, ICAM1             |
| Dilated cardiomyopathy                          | 8            | 0.000104       | ITGB1, ITGB5, ITGB3, MYL3, ITGAV, MYH6, ACTB, MYH7        |
| ECM-receptor interaction                        | 5            | 0.017845       | ITGB1, ITGB5, ITGB3, ITGAV, CD44                          |
| Focal adhesion                                  | 9            | 0.002008       | ITGB1, ITGB5, ACTN1, ITGB3, RAC2, ZYX, ITGAV, PRKCA, ACTB |
| Hypertrophic cardiomyopathy                     | 8            | 6.91E-05       | ITGB1, ITGB5, ITGB3, MYL3, ITGAV, MYH6, ACTB, MYH7        |
| Leukocyte transendothelial migration            | 7            | 0.001856       | ITGB1, ACTN1, RAC2, PRKCA, F11R, ACTB, ICAM1              |
| Phagosome                                       | 7            | 0.007645       | ITGB1, ATP6V1G1, ITGB5, ITGB3, ATP6V0A2, ITGAV, ACTB      |
| Proteoglycans in cancer                         | 8            | 0.008743       | ITGB1, ITGB5, ITGB3, PDCD4, ITGAV, PRKCA, CD44, ACTB      |
| Rap1 signaling pathway                          | 8            | 0.009912       | ITGB1, ITGB3, RAC2, PRKD2, PRKCA, TEK, PLCB1, ACTB        |

|                                                |    |          |                                                                                                                                                |
|------------------------------------------------|----|----------|------------------------------------------------------------------------------------------------------------------------------------------------|
| Regulation of actin cytoskeleton               | 7  | 0.037922 | ITGB1, ITGB5, ACTN1, ITGB3, RAC2, ITGAV, ACTB                                                                                                  |
| Thyroid hormone signaling pathway              | 8  | 0.000439 | ITGB3, ATP1B3, ITGAV, PRKCA, PLCB1, MYH6, ACTB, MYH7                                                                                           |
| Tight junction                                 | 6  | 0.043519 | ITGB1, ACTN1, SCRIB, F11R, MPDZ, ACTB                                                                                                          |
| Viral myocarditis                              | 6  | 0.000576 | CD40, RAC2, MYH6, ACTB, MYH7, ICAM1                                                                                                            |
| Cell junction organization                     | 5  | 0.021146 | ITGB1, CD151, ACTN1, F11R, ACTB                                                                                                                |
| Cell surface interactions at the vascular wall | 9  | 0.000186 | ITGB1, SLC7A5, ITGB3, SIRPA, ATP1B3, ITGAV, TEK, F11R, CD44                                                                                    |
| Cell-Cell communication                        | 6  | 0.016928 | ITGB1, CD151, ACTN1, SIRPA, F11R, ACTB                                                                                                         |
| Extracellular matrix organization              | 13 | 0.000188 | ITGB1, CD151, ITGB5, ITGB3, ACTN1, ICAM2, PRKCA, F11R, ICAM1, TIMP2, ADAM9, ITGAV, CD44                                                        |
| Hemostasis                                     | 21 | 2.8E-05  | ITGB1, ANXA2, TEX264, DGKA, ITGB3, ACTN1, ATP1B3, PRKCA, F11R, ACTB, RHOB, SLC7A5, P2RX4, RAC2, SIRPA, ITGAV, TAGLN2, TEK, CD44, MGLL, S100A10 |
| Integrin cell surface interactions             | 8  | 5.51E-05 | ITGB1, ITGB5, ITGB3, ICAM2, ITGAV, F11R, CD44, ICAM1                                                                                           |



|                                                |    |          |                                                                                                                        |
|------------------------------------------------|----|----------|------------------------------------------------------------------------------------------------------------------------|
| L1CAM interactions                             | 5  | 0.049246 | ITGB1, ALCAM, ITGB3, ITGAV, ACTB                                                                                       |
| M Phase                                        | 12 | 0.009113 | PCM1, UBE2E1, NCAPG, VRK1, PRKCA, PDS5B, H4C1, PCNT, LBR, CLASP1, MAD1L1, LMNB1                                        |
| Non-integrin membrane-ECM interactions         | 6  | 0.000584 | ITGB1, ITGB5, ACTN1, ITGB3, ITGAV, PRKCA                                                                               |
| Platelet activation, signaling and aggregation | 9  | 0.011334 | TEX264, DGKA, ACTN1, ITGB3, RAC2, TAGLN2, PRKCA, MGLL, RHOB                                                            |
| RAC2 GTPase cycle                              | 5  | 0.01894  | ITGB1, MCAM, RAC2, ERBIN, LBR                                                                                          |
| RHO GTPase cycle                               | 18 | 1.56E-05 | ITGB1, BCAP31, FNBP1, MCAM, ACTN1, ERBIN, WWP2, SCRIB, ACTB, LMNB1, RHOB, ARHGAP12, ANLN, BASP1, FLOT1, RAC2, CKB, LBR |
| RHOA GTPase cycle                              | 6  | 0.027919 | BCAP31, ANLN, MCAM, FLOT1, ERBIN, LBR                                                                                  |
| RHOB GTPase cycle                              | 5  | 0.008724 | ANLN, MCAM, FLOT1, ERBIN, RHOB                                                                                         |
| RHOC GTPase cycle                              | 5  | 0.010568 | ANLN, MCAM, FLOT1, ERBIN, LBR                                                                                          |
| RHOD GTPase cycle                              | 5  | 0.003466 | MCAM, ACTN1, LBR, LMNB1, ARHGAP12                                                                                      |
| RHOF GTPase cycle                              | 6  | 0.000116 | BASP1, MCAM, ACTN1, ACTB, LMNB1, ARHGAP12                                                                              |

|                                                    |    |          |                                                                                                                                                     |
|----------------------------------------------------|----|----------|-----------------------------------------------------------------------------------------------------------------------------------------------------|
| Signaling by Rho GTPases                           | 22 | 5.67E-05 | ITGB1, BCAP31, FNBP1, MCAM, ACTN1, ERBIN, PRKCA, WWP2, SCRIB, ACTB, LMNB1, RHOB, ARHGAP12, ANLN, BASP1, FLOT1, RAC2, CKB, H4C1, LBR, CLASP1, MAD1L1 |
| Signaling by Rho GTPases, Miro GTPases and RHOBTB3 | 22 | 7.82E-05 | ITGB1, BCAP31, FNBP1, MCAM, ACTN1, ERBIN, PRKCA, WWP2, SCRIB, ACTB, LMNB1, RHOB, ARHGAP12, ANLN, BASP1, FLOT1, RAC2, CKB, H4C1, LBR, CLASP1, MAD1L1 |
| Signaling by TGFB family members                   | 8  | 0.00043  | ITGB1, DRAP1, ACVRL1, ITGB5, ITGB3, ITGAV, F11R, TGFBR2                                                                                             |
| Signaling by TGF-beta Receptor Complex             | 6  | 0.003674 | ITGB1, ITGB5, ITGB3, ITGAV, F11R, TGFBR2                                                                                                            |
| Syndecan interactions                              | 6  | 1.26E-05 | ITGB1, ITGB5, ACTN1, ITGB3, ITGAV, PRKCA                                                                                                            |
| TGF-beta receptor signaling activates SMADs        | 5  | 0.00192  | ITGB1, ITGB5, ITGB3, ITGAV, TGFBR2                                                                                                                  |

Supplemental Table 3. DAVID analysis for the 81 proteins with significant differences between diabetic tRES+HESP treatment vs. diabetic controls.

| DIESEASE                                       | Count | P Value  | Genes                                                                         |
|------------------------------------------------|-------|----------|-------------------------------------------------------------------------------|
| Abortion, Spontaneous                          | 5     | 0.002716 | TGFB1, RRM2, TFRC, HMOX1, H1-2                                                |
| Alzheimer's Disease                            | 6     | 0.002912 | BACE2, ACE, HTRA1, HMOX1, TFAM, PSEN1                                         |
| Alzheimer's disease                            | 5     | 0.038235 | TGFB1, ACE, ERCC2, TFAM, PSEN1                                                |
| Alzheimer's disease                            | 12    | 0.011394 | BACE2, TGFB1, ACE, HINT2, MMP2, HTRA1, ADAM9, HMOX1, TFAM, ECE1, NOC3L, PSEN1 |
| Arthritis, Rheumatoid <br>Rheumatoid Arthritis | 5     | 0.014459 | MAP2K3, TGFB1, ACE, HTRA1, HMOX1                                              |
| atherosclerosis                                | 9     | 0.000463 | TGFB1, ACE, SELENOS, MMP2, HTRA1, HMOX1, ECE1, THBS1, SREBF2                  |
| bladder cancer                                 | 8     | 0.022349 | H2AX, TGFB1, ACE, TFRC, MMP2, ERCC2, HMOX1, DDB2                              |
| breast cancer                                  | 11    | 0.001073 | H2AX, CCNB1, TGFB1, ACE, TFRC, MMP2, ERCC2, HMOX1, CSNK1E, TGFBR2, DDB2       |

|                                                                                                                                                                      |   |          |                                                         |
|----------------------------------------------------------------------------------------------------------------------------------------------------------------------|---|----------|---------------------------------------------------------|
| Chorioamnionitis Fetal Membranes,<br>Premature Rupture Infection of<br>amniotic sac and membranes                                                                    | 6 | 0.003123 | MMP14, TGFB1, ACE, MMP2, FN1, THBS1                     |
| Chorioamnionitis Fetal Membranes,<br>Premature Rupture Infection of<br>amniotic sac and membranes Obstetric<br>Labor,<br>Premature Pre-<br>EclampsialPremature Birth | 6 | 0.003195 | MMP14, TGFB1, ACE, MMP2, FN1, THBS1                     |
| Cleft Lip Cleft Palate                                                                                                                                               | 8 | 0.004995 | MMP14, GJA1, SMAD4, TGFB1, MMP2, ERCC2, FN1,<br>TGFB2   |
| colorectal cancer                                                                                                                                                    | 8 | 0.007474 | TGFB1, ACE, SELENOS, TFRC, MMP2, ERCC2, THBS1,<br>TGFB2 |
| depression                                                                                                                                                           | 5 | 0.007838 | TGFB1, ACE, TCF4, CSNK1E, PSEN1                         |
| esophageal adenocarcinoma                                                                                                                                            | 6 | 0.039245 | MMP14, CCNB1, TGFB1, MMP2, ERCC2, THBS1                 |
| Hepatopulmonary SyndromelLiver<br>Cirrhosis                                                                                                                          | 8 | 6.42E-07 | ACVRL1, SMAD4, TGFB1, ACE, MMP2, HMOX1, ECE1,<br>THBS1  |
| Kidney Failure, Chronic                                                                                                                                              | 5 | 0.012872 | TGFB1, ACE, MMP2, HMOX1, TGFB2                          |
| lung cancer                                                                                                                                                          | 8 | 0.038253 | TGFB1, ACE, TFRC, MMP2, ERCC2, FN1, HMOX1, DDB2         |

|                                                                                                                                                                                                     |    |          |                                                                                                                                             |
|-----------------------------------------------------------------------------------------------------------------------------------------------------------------------------------------------------|----|----------|---------------------------------------------------------------------------------------------------------------------------------------------|
| Obesity POF - Premature ovarian failure POLYCYSTIC OVARIAN SYNDROME Polycystic Ovary Syndrome Primary Ovarian Insufficiency Puberty, Delayed Puberty, Precocious Thrombophilia Tobacco Use Disorder | 5  | 0.044471 | ACVRL1, SMAD4, ACE, SREBF2, TGFBR2                                                                                                          |
| stomach cancer                                                                                                                                                                                      | 6  | 0.000157 | TGFB1, ACE, MMP2, ERCC2, HSPA13, TGFBR2                                                                                                     |
| Stomach Neoplasms                                                                                                                                                                                   | 6  | 0.000336 | SMAD4, TGFB1, ACE, ERCC2, HMOX1, ECE1                                                                                                       |
| Type 2 diabetes                                                                                                                                                                                     | 6  | 0.041299 | TGFB1, NOTCH1, ACE, TFRC, MMP2, HMOX1                                                                                                       |
| Type 2 Diabetes  edema   rosiglitazone                                                                                                                                                              | 21 | 0.009209 | ACVRL1, SMAD4, TGFB1, ACE, TFRC, MMP2, HTRA1, FN1, ECE1, CSNK1E, THBS1, SREBF2, TGFBR2, BACE2, CYB5R1, MMP14, GJA1, ERCC2, MYL3, HMOX1, TK1 |
| AGING                                                                                                                                                                                               | 11 | 0.02797  | DNAJB2, TGFB1, NOTCH1, ACE, ERCC2, FN1, HMOX1, TCF4, PSEN1, TXNDC5, H1-2                                                                    |
| DEVELOPMENTAL                                                                                                                                                                                       | 17 | 0.004665 | SMAD4, TGFB1, ACE, NOTCH1, MMP2, FN1, PSEN1, MID1, RHOB, TGFBR2, MMP14, GJA1, EMCN, MYL1, ERCC2, SERINC1, ITGA5                             |

|                 |    |          |                                                                                                                                                                                                                                                                    |
|-----------------|----|----------|--------------------------------------------------------------------------------------------------------------------------------------------------------------------------------------------------------------------------------------------------------------------|
| IMMUNE          | 25 | 0.017774 | ACVRL1, TFRC, HTRA1, HMGB1, ANTXR2, ATXN2, FCGRT, HMOX1, FAM43A, TXNDC5, MAP2K3, SMAD4, TGFB1, ACE, MMP2, NOC3L, RHOB, TGFBR2, TTC17, DDB2, BACE2, MMP14, EMCN, SELENOS, ERCC2                                                                                     |
| METABOLIC       | 37 | 0.03417  | ACVRL1, RALA, NOTCH1, TFRC, HTRA1, MOSPD2, ECE1, PSEN1, AGAP3, THBS1, HSPA13, SEL1L3, GJA1, ATXN2, SMCHD1, WDR5, ATP6V0A2, HMOX1, FAM43A, SMAD4, TGFB1, ACE, MMP2, OSBPL3, CRIM1, SREBF2, MID2, RHOB, TGFBR2, TTC17, DDB2, BACE2, EMCN, SELENOS, ERCC2, TFAM, TCF4 |
| PHARMACOGENOMIC | 22 | 0.04156  | ACVRL1, SMAD4, TGFB1, ACE, TFRC, MMP2, HTRA1, FN1, ECE1, CSNK1E, THBS1, SREBF2, TGFBR2, IRF2BPL, BACE2, CYB5R1, MMP14, GJA1, ERCC2, MYL3, HMOX1, TK1                                                                                                               |
| RENAL           | 14 | 0.034583 | TGFB1, ACE, NOTCH1, OSBPL3, MMP2, FN1, ECE1, THBS1, RHOB, TGFBR2, MMP14, ATXN2, ERCC2, HMOX1                                                                                                                                                                       |
| REPRODUCTION    | 17 | 3.32E-05 | H2AX, SMAD4, TGFB1, RRM2, ACE, TFRC, MMP2, HMGB2, FN1, THBS1, TGFBR2, H1-2, MMP14, SELENOS, ERCC2, TFAM, HMOX1                                                                                                                                                     |

|                                |              |               |                                                                                                                                                                                                                                                                                                                                                                               |
|--------------------------------|--------------|---------------|-------------------------------------------------------------------------------------------------------------------------------------------------------------------------------------------------------------------------------------------------------------------------------------------------------------------------------------------------------------------------------|
| VISION                         | 9            | 0.029581      | ATXN2, TGFB1, ACE, HERC1, MMP2, ERCC2, HTRA1, TCF4, PSEN1                                                                                                                                                                                                                                                                                                                     |
| <b>Molecular function</b>      | <b>Count</b> | <b>PValue</b> | <b>Genes</b>                                                                                                                                                                                                                                                                                                                                                                  |
| enzyme binding                 | 26           | 2.07E-06      | H2AX, ACVRL1, RALA, NOTCH1, TFRC, RNF14, HMGB1, PSEN1, DNAJB2, CCNB1, TMSB4X, ATP6V0A2, HMOX1, MAP2K3, TGFB1, ACE, FN1, TRIP4, MID1, MID2, RHOB, TGFBR2, SELENOS, ADAM9, PREB, SERINC1                                                                                                                                                                                        |
| damaged DNA binding            | 5            | 0.000308      | H2AX, ERCC2, HMGB2, HMGB1, DDB2                                                                                                                                                                                                                                                                                                                                               |
| macromolecular complex binding | 16           | 0.000597      | ACVRL1, SMAD4, TGFB1, TFRC, FN1, HMGB1, THBS1, TGFBR2, DDB2, H1-2, DNAJB2, MMP14, FCGRT, ADAM9, ITGA5, HMG2                                                                                                                                                                                                                                                                   |
| integrin binding               | 6            | 0.000654      | MMP14, FN1, ADAM9, HMGB1, ITGA5, THBS1                                                                                                                                                                                                                                                                                                                                        |
| protein binding                | 73           | 0.000896      | H2AX, ACVRL1, TFRC, RNF14, KDELR1, HMGB2, ECE1, HMGB1, ANTXR2, LARP1B, IRF2BPL, TIAL1, GJA1, SMCHD1, FCGRT, TMSB4X, WDR5, TK1, HMG2, MAP2K3, MMP2, CSNK1E, MID1, MID2, SREBF2, RHOB, TGFBR2, DDB2, BACE2, MMP14, TMX2, SELENOS, MYL3, ADAM9, TFAM, PREB, ITGA5, GTF3C1, RALA, NOTCH1, HTRA1, MOSPD2, PSEN1, AGAP3, THBS1, HSPA13, DNAJB2, EFN1, CYB5R1, ATXN2, CCNB1, DNAJB4, |

|                                                |    |          |                                                                                                                                                                                                                                                                               |
|------------------------------------------------|----|----------|-------------------------------------------------------------------------------------------------------------------------------------------------------------------------------------------------------------------------------------------------------------------------------|
|                                                |    |          | DGLUCY, ATP6V0A2, HMOX1, FAM43A, TXNDC5, SMAD4, TGFB1, RRM2, ACE, OSBPL3, FN1, CRIM1, TRIP4, ZZEF1, H1-2, TTC17, ERCC2, PLXNB2, TCF4, SERINC1, ITM2B                                                                                                                          |
| receptor binding                               | 18 | 0.001011 | RALA, TGFB1, ACE, NOTCH1, RNF14, HMGB2, FN1, TRIP4, HMGB1, PSEN1, THBS1, TGFB2, EFNB1, MMP14, ATXN2, CCNB1, ADAM9, ITGA5                                                                                                                                                      |
| protein complex binding                        | 11 | 0.001155 | DNAJB2, ACVRL1, MMP14, SMAD4, FCGRT, FN1, ADAM9, HMGB1, ITGA5, THBS1, TGFB2                                                                                                                                                                                                   |
| metalloendopeptidase activity                  | 5  | 0.001715 | MMP14, ACE, MMP2, ADAM9, ECE1                                                                                                                                                                                                                                                 |
| metallopeptidase activity                      | 6  | 0.001739 | MMP14, ACE, TFRC, MMP2, ADAM9, ECE1                                                                                                                                                                                                                                           |
| transcription factor activity, protein binding | 9  | 0.00222  | GTF3C1, NOTCH1, RNF14, HMGB2, TFAM, TRIP4, HMGB1, MID2, IRF2BPL                                                                                                                                                                                                               |
| catalytic activity                             | 39 | 0.00315  | ACVRL1, RALA, RETSAT, TFRC, RNF14, HTRA1, ECE1, HMGB1, PSEN1, AGAP3, HSPA13, IRF2BPL, CYB5R1, SMCHD1, HINT2, HERC1, DGLUCY, WDR5, ATP6V0A2, HMOX1, TK1, TXNDC5, MAP2K3, RRM2, ACE, MMP2, CRIM1, CSNK1E, MID1, MID2, RHOB, TGFB2, DDB2, BACE2, MMP14, TMX2, ERCC2, MYL3, ADAM9 |



|                                                     |    |          |                                                                                                                                                                                                                                                                                                                                                                                |
|-----------------------------------------------------|----|----------|--------------------------------------------------------------------------------------------------------------------------------------------------------------------------------------------------------------------------------------------------------------------------------------------------------------------------------------------------------------------------------|
| growth factor binding                               | 5  | 0.003321 | ACVRL1, CRIM1, HTRA1, THBS1, TGFBR2                                                                                                                                                                                                                                                                                                                                            |
| endopeptidase activity                              | 8  | 0.00431  | BACE2, MMP14, ACE, MMP2, HTRA1, ADAM9, ECE1, PSEN1                                                                                                                                                                                                                                                                                                                             |
| peptidase activity, acting on L-amino acid peptides | 9  | 0.006749 | BACE2, MMP14, ACE, TFRC, MMP2, HTRA1, ADAM9, ECE1, PSEN1                                                                                                                                                                                                                                                                                                                       |
| transcription coactivator activity                  | 6  | 0.007676 | NOTCH1, RNF14, HMGB2, TRIP4, HMGB1, MID2                                                                                                                                                                                                                                                                                                                                       |
| peptidase activity                                  | 9  | 0.008442 | BACE2, MMP14, ACE, TFRC, MMP2, HTRA1, ADAM9, ECE1, PSEN1                                                                                                                                                                                                                                                                                                                       |
| protein C-terminus binding                          | 5  | 0.011947 | ATXN2, ERCC2, FN1, TCF4, SREBF2                                                                                                                                                                                                                                                                                                                                                |
| protein kinase binding                              | 9  | 0.012671 | MAP2K3, ACVRL1, CCNB1, ACE, TFRC, ADAM9, TRIP4, RHOB, TGFBR2                                                                                                                                                                                                                                                                                                                   |
| binding                                             | 79 | 0.013511 | H2AX, ACVRL1, TFRC, RNF14, KDELR1, HMGB2, ECE1, HMGB1, ANTXR2, LARP1B, IRF2BPL, TIAL1, GJA1, SMCHD1, HINT2, FCGRT, TMSB4X, WDR5, TK1, HMGN2, HMGB1P1, MAP2K3, MMP2, CSNK1E, MID1, MID2, SREBF2, RHOB, TGFBR2, DDB2, BACE2, MMP14, EMCN, TMX2, SELENOS, MYL1, MYL3, ADAM9, TFAM, PREB, KDELR2, ITGA5, GTF3C1, RALA, NOTCH1, HTRA1, MOSPD2, PSEN1, AGAP3, THBS1, HSPA13, DNAJB2, |

|                                                                |    |          |                                                                                                                                                                                                  |
|----------------------------------------------------------------|----|----------|--------------------------------------------------------------------------------------------------------------------------------------------------------------------------------------------------|
|                                                                |    |          | EFNB1, CYB5R1, ATXN2, CCNB1, DNAJB4, DGLUCY, ATP6V0A2, HMOX1, FAM43A, TXNDC5, SMAD4, TGFB1, RRM2, ACE, OSBPL3, FN1, CRIM1, TRIP4, NOC3L, ZZEF1, H1-2, TTC17, ERCC2, PLXNB2, TCF4, SERINC1, ITM2B |
| enzyme activator activity                                      | 8  | 0.014077 | DNAJB2, CCNB1, TGFB1, DNAJB4, FN1, PREB, HMGB1, AGAP3                                                                                                                                            |
| protein dimerization activity                                  | 11 | 0.018338 | H2AX, SMCHD1, SMAD4, RRM2, TFRC, HMOX1, ECE1, TCF4, MID1, SREBF2, MID2                                                                                                                           |
| kinase binding                                                 | 9  | 0.023519 | MAP2K3, ACVRL1, CCNB1, ACE, TFRC, ADAM9, TRIP4, RHOB, TGFBR2                                                                                                                                     |
| transcription cofactor activity                                | 7  | 0.023709 | NOTCH1, RNF14, HMGB2, TRIP4, HMGB1, MID2, IRF2BPL                                                                                                                                                |
| transcription factor activity,<br>transcription factor binding | 7  | 0.023905 | NOTCH1, RNF14, HMGB2, TRIP4, HMGB1, MID2, IRF2BPL                                                                                                                                                |
| cell adhesion molecule binding                                 | 7  | 0.026552 | MMP14, FN1, ADAM9, HMGB1, ITGA5, PSEN1, THBS1                                                                                                                                                    |
| protein homodimerization activity                              | 8  | 0.031898 | SMCHD1, SMAD4, RRM2, TFRC, HMOX1, ECE1, MID1, MID2                                                                                                                                               |
| zinc ion binding                                               | 9  | 0.031903 | MMP14, ACE, MMP2, TRIP4, ECE1, TK1, MID1, MID2, ZZEF1                                                                                                                                            |

|                                                          |              |                |                                                                                                                                                                                                                                                            |
|----------------------------------------------------------|--------------|----------------|------------------------------------------------------------------------------------------------------------------------------------------------------------------------------------------------------------------------------------------------------------|
| hydrolase activity                                       | 19           | 0.034938       | RALA, ACE, TFRC, MMP2, HTRA1, ECE1, AGAP3, PSEN1, HSPA13, RHOB, BACE2, MMP14, SMCHD1, HINT2, ERCC2, MYL3, ATP6V0A2, ADAM9, HMOX1                                                                                                                           |
| identical protein binding                                | 16           | 0.040349       | SMAD4, TGFB1, RRM2, NOTCH1, TFRC, HTRA1, FN1, ECE1, THBS1, MID1, MID2, SMCHD1, TMX2, HMOX1, TCF4, TK1                                                                                                                                                      |
| heterocyclic compound binding                            | 36           | 0.04907        | H2AX, ACVRL1, GTF3C1, RALA, NOTCH1, TFRC, HMGB2, HMGB1, AGAP3, HSPA13, LARP1B, TIAL1, CYB5R1, ATXN2, SMCHD1, HINT2, TMSB4X, HMOX1, TK1, HMGN2, HMGB1P1, MAP2K3, SMAD4, ACE, CSNK1E, NOC3L, SREBF2, RHOB, TGFB2, DDB2, H1-2, ERCC2, TFAM, PREB, TCF4, ITM2B |
| ubiquitin-like protein ligase binding                    | 5            | 0.049338       | DNAJB2, RALA, CCNB1, TRIP4, MID1                                                                                                                                                                                                                           |
|                                                          |              |                |                                                                                                                                                                                                                                                            |
| <b>Biological process</b>                                | <b>Count</b> | <b>P Value</b> | <b>Genes</b>                                                                                                                                                                                                                                               |
| anatomical structure formation involved in morphogenesis | 23           | 4.76E-09       | ACVRL1, RALA, SMAD4, TGFB1, ACE, NOTCH1, MMP2, HTRA1, FN1, HMGB1, PSEN1, THBS1, RHOB, TGFB2, MMP14, GJA1, EMCN, HERC1, ERCC2, PLXNB2, ADAM9, HMOX1, ITGA5                                                                                                  |

|                                                   |    |          |                                                                                                                                                                                                                                                                   |
|---------------------------------------------------|----|----------|-------------------------------------------------------------------------------------------------------------------------------------------------------------------------------------------------------------------------------------------------------------------|
| response to oxygen levels                         | 14 | 6.46E-09 | ACVRL1, SMAD4, TGFB1, ACE, NOTCH1, TFRC, MMP2, THBS1, TGFBR2, MMP14, CCNB1, ERCC2, ATP6V0A2, HMOX1                                                                                                                                                                |
| response to hypoxia                               | 13 | 1.41E-08 | ACVRL1, SMAD4, TGFB1, ACE, NOTCH1, TFRC, MMP2, THBS1, TGFBR2, MMP14, CCNB1, ERCC2, HMOX1                                                                                                                                                                          |
| response to decreased oxygen levels               | 13 | 2.35E-08 | ACVRL1, SMAD4, TGFB1, ACE, NOTCH1, TFRC, MMP2, THBS1, TGFBR2, MMP14, CCNB1, ERCC2, HMOX1                                                                                                                                                                          |
| positive regulation of cellular metabolic process | 37 | 9.28E-08 | H2AX, ACVRL1, NOTCH1, TFRC, RNF14, HMGB2, ECE1, HMGB1, PSEN1, THBS1, LARP1B, IRF2BPL, DNAJB2, SMCHD1, CCNB1, TMSB4X, WDR5, HMOX1, MAP2K3, SMAD4, TGFB1, ACE, FN1, TRIP4, CSNK1E, MID1, SREBF2, MID2, TGFBR2, H1-2, MMP14, ERCC2, PLXNB2, TFAM, ADAM9, TCF4, ITGA5 |
| ameboidal-type cell migration                     | 14 | 1.04E-07 | MAP2K3, ACVRL1, TGFB1, NOTCH1, FN1, HMGB1, THBS1, RHOB, TGFBR2, EFNB1, GJA1, TMSB4X, ADAM9, HMOX1                                                                                                                                                                 |
| circulatory system development                    | 21 | 1.15E-07 | MAP2K3, ACVRL1, SMAD4, TGFB1, ACE, NOTCH1, MMP2, FN1, ECE1, HMGB1, PSEN1, THBS1, RHOB, TGFBR2, MMP14, GJA1, CCNB1, EMCN, MYL3, HMOX1, ITGA5                                                                                                                       |

|                                                        |    |          |                                                                                                                                                                                                                                                                         |
|--------------------------------------------------------|----|----------|-------------------------------------------------------------------------------------------------------------------------------------------------------------------------------------------------------------------------------------------------------------------------|
| positive regulation of cell migration                  | 15 | 1.37E-07 | MAP2K3, TGFB1, NOTCH1, MMP2, MOSPD2, FN1, HMGB1, THBS1, RHOB, TGFBR2, MMP14, TMSB4X, ADAM9, HMOX1, ITGA5                                                                                                                                                                |
| positive regulation of metabolic process               | 38 | 1.85E-07 | H2AX, ACVRL1, NOTCH1, TFRC, RNF14, HMGB2, ECE1, HMGB1, PSEN1, THBS1, LARP1B, IRF2BPL, DNAJB2, GJA1, SMCHD1, CCNB1, TMSB4X, WDR5, HMOX1, MAP2K3, SMAD4, TGFB1, ACE, FN1, TRIP4, CSNK1E, MID1, SREBF2, MID2, TGFBR2, H1-2, MMP14, ERCC2, PLXNB2, TFAM, ADAM9, TCF4, ITGA5 |
| regulation of cell migration                           | 19 | 2.15E-07 | MAP2K3, ACVRL1, TGFB1, ACE, NOTCH1, MMP2, MOSPD2, FN1, HMGB1, THBS1, RHOB, TGFBR2, MMP14, GJA1, TMSB4X, PLXNB2, ADAM9, HMOX1, ITGA5                                                                                                                                     |
| positive regulation of cell motility                   | 15 | 2.41E-07 | MAP2K3, TGFB1, NOTCH1, MMP2, MOSPD2, FN1, HMGB1, THBS1, RHOB, TGFBR2, MMP14, TMSB4X, ADAM9, HMOX1, ITGA5                                                                                                                                                                |
| positive regulation of macromolecule metabolic process | 36 | 2.45E-07 | H2AX, ACVRL1, NOTCH1, TFRC, RNF14, HMGB2, ECE1, HMGB1, PSEN1, THBS1, LARP1B, IRF2BPL, DNAJB2, GJA1, SMCHD1, CCNB1, WDR5, MAP2K3, SMAD4, TGFB1, ACE, FN1, TRIP4, CSNK1E, MID1, SREBF2, MID2, TGFBR2,                                                                     |

|                                                    |    |          |                                                                                                                                                             |
|----------------------------------------------------|----|----------|-------------------------------------------------------------------------------------------------------------------------------------------------------------|
|                                                    |    |          | H1-2, MMP14, ERCC2, PLXNB2, TFAM, ADAM9, TCF4, ITGA5                                                                                                        |
| regulation of locomotion                           | 20 | 2.86E-07 | MAP2K3, ACVRL1, TGFB1, ACE, NOTCH1, MMP2, MOSPD2, FN1, HMGB1, THBS1, MID2, RHOB, TGFBR2, MMP14, GJA1, TMSB4X, PLXNB2, ADAM9, HMOX1, ITGA5                   |
| positive regulation of developmental process       | 23 | 3.26E-07 | ACVRL1, RALA, SMAD4, TGFB1, ACE, NOTCH1, TFRC, HMGB2, FN1, HMGB1, CSNK1E, PSEN1, THBS1, RHOB, TGFBR2, MMP14, GJA1, CCNB1, PLXNB2, ADAM9, HMOX1, TCF4, ITGA5 |
| positive regulation of cellular component movement | 15 | 3.4E-07  | MAP2K3, TGFB1, NOTCH1, MMP2, MOSPD2, FN1, HMGB1, THBS1, RHOB, TGFBR2, MMP14, TMSB4X, ADAM9, HMOX1, ITGA5                                                    |
| positive regulation of locomotion                  | 15 | 4.26E-07 | MAP2K3, TGFB1, NOTCH1, MMP2, MOSPD2, FN1, HMGB1, THBS1, RHOB, TGFBR2, MMP14, TMSB4X, ADAM9, HMOX1, ITGA5                                                    |
| regulation of epithelial cell migration            | 11 | 4.42E-07 | MAP2K3, ACVRL1, TGFB1, NOTCH1, TMSB4X, ADAM9, HMOX1, HMGB1, THBS1, RHOB, TGFBR2                                                                             |
| locomotion                                         | 26 | 4.53E-07 | ACVRL1, RALA, NOTCH1, HMGB2, MOSPD2, ECE1, HMGB1, PSEN1, THBS1, EFNB1, GJA1, TMSB4X, HMOX1,                                                                 |

|                                                        |    |          |                                                                                                                                                                       |
|--------------------------------------------------------|----|----------|-----------------------------------------------------------------------------------------------------------------------------------------------------------------------|
|                                                        |    |          | MAP2K3, SMAD4, TGFB1, ACE, MMP2, FN1, MID2, RHOB, TGFB2, MMP14, PLXNB2, ADAM9, ITGA5                                                                                  |
| negative regulation of cellular component organization | 17 | 5.06E-07 | ACVRL1, SMAD4, TGFB1, ACE, NOTCH1, TFRC, HMGB1, PSEN1, THBS1, MID1, H1-2, DNAJB2, MMP14, ATXN2, CCNB1, TMSB4X, WDR5                                                   |
| regulation of cell motility                            | 19 | 5.14E-07 | MAP2K3, ACVRL1, TGFB1, ACE, NOTCH1, MMP2, MOSPD2, FN1, HMGB1, THBS1, RHOB, TGFB2, MMP14, GJA1, TMSB4X, PLXNB2, ADAM9, HMOX1, ITGA5                                    |
| response to fluid shear stress                         | 6  | 6.4E-07  | GJA1, TGFB1, ACE, MMP2, ADAM9, SREBF2                                                                                                                                 |
| embryo development                                     | 19 | 6.41E-07 | ACVRL1, RALA, SMAD4, TGFB1, RRM2, ACE, NOTCH1, MMP2, FN1, ECE1, PSEN1, TGFB2, EFNB1, MMP14, GJA1, CCNB1, ERCC2, PLXNB2, ITGA5                                         |
| positive regulation of epithelial cell migration       | 9  | 8.86E-07 | MAP2K3, TGFB1, TMSB4X, ADAM9, HMOX1, HMGB1, THBS1, RHOB, TGFB2                                                                                                        |
| positive regulation of protein metabolic process       | 24 | 9E-07    | MAP2K3, ACVRL1, SMAD4, TGFB1, ACE, NOTCH1, TFRC, RNF14, FN1, HMGB1, CSNK1E, PSEN1, THBS1, MID1, LARP1B, TGFB2, DNAJB2, MMP14, GJA1, CCNB1, WDR5, PLXNB2, ADAM9, ITGA5 |

|                                                            |    |          |                                                                                                                                                                                                 |
|------------------------------------------------------------|----|----------|-------------------------------------------------------------------------------------------------------------------------------------------------------------------------------------------------|
| positive regulation of nitrogen compound metabolic process | 27 | 9.05E-07 | H2AX, ACVRL1, NOTCH1, TFRC, RNF14, HMGB2, HMGB1, PSEN1, THBS1, LARP1B, IRF2BPL, SMCHD1, CCNB1, TMSB4X, WDR5, MAP2K3, SMAD4, TGFB1, TRIP4, CSNK1E, SREBF2, MID2, H1-2, ERCC2, PLXNB2, TFAM, TCF4 |
| cell migration                                             | 22 | 1.17E-06 | MAP2K3, ACVRL1, TGFB1, ACE, NOTCH1, MMP2, HMGB2, MOSPD2, FN1, HMGB1, PSEN1, THBS1, RHOB, TGFB2, EFNB1, MMP14, GJA1, TMSB4X, PLXNB2, ADAM9, HMOX1, ITGA5                                         |
| endoderm development                                       | 7  | 1.43E-06 | MMP14, SMAD4, TGFB1, NOTCH1, MMP2, FN1, ITGA5                                                                                                                                                   |
| positive regulation of cellular protein metabolic process  | 23 | 1.46E-06 | MAP2K3, ACVRL1, SMAD4, TGFB1, ACE, NOTCH1, TFRC, RNF14, FN1, HMGB1, CSNK1E, PSEN1, THBS1, MID1, LARP1B, TGFB2, DNAJB2, MMP14, CCNB1, WDR5, PLXNB2, ADAM9, ITGA5                                 |
| regulation of cellular component movement                  | 19 | 1.62E-06 | MAP2K3, ACVRL1, TGFB1, ACE, NOTCH1, MMP2, MOSPD2, FN1, HMGB1, THBS1, RHOB, TGFB2, MMP14, GJA1, TMSB4X, PLXNB2, ADAM9, HMOX1, ITGA5                                                              |
| heart development                                          | 14 | 1.8E-06  | MAP2K3, ACVRL1, SMAD4, TGFB1, ACE, NOTCH1, MMP2, FN1, ECE1, PSEN1, TGFB2, GJA1, CCNB1, MYL3                                                                                                     |



|                                                         |    |          |                                                                                                                                                                                                                                                                                                                             |
|---------------------------------------------------------|----|----------|-----------------------------------------------------------------------------------------------------------------------------------------------------------------------------------------------------------------------------------------------------------------------------------------------------------------------------|
| response to abiotic stimulus                            | 19 | 2.07E-06 | H2AX, ACVRL1, SMAD4, TGFB1, ACE, NOTCH1, TFRC, MMP2, THBS1, RHOB, TGFBR2, DDB2, MMP14, GJA1, CCNB1, DNAJB4, ERCC2, ATP6V0A2, HMOX1                                                                                                                                                                                          |
| morphogenesis of an epithelium                          | 13 | 2.23E-06 | ACVRL1, RALA, SMAD4, TGFB1, NOTCH1, MMP2, PSEN1, RHOB, TGFBR2, MMP14, GJA1, PLXNB2, ITGA5                                                                                                                                                                                                                                   |
| tube development                                        | 14 | 2.62E-06 | ACVRL1, RALA, SMAD4, TGFB1, ACE, NOTCH1, ECE1, HMGB1, PSEN1, RHOB, TGFBR2, MMP14, CCNB1, PLXNB2                                                                                                                                                                                                                             |
| tissue morphogenesis                                    | 14 | 2.67E-06 | ACVRL1, RALA, SMAD4, TGFB1, NOTCH1, MMP2, PSEN1, RHOB, TGFBR2, MMP14, GJA1, MYL3, PLXNB2, ITGA5                                                                                                                                                                                                                             |
| positive regulation of cellular process                 | 46 | 2.72E-06 | H2AX, ACVRL1, RALA, NOTCH1, TFRC, RNF14, HMGB2, HTRA1, MOSPD2, ECE1, HMGB1, PSEN1, THBS1, LARP1B, IRF2BPL, TIAL1, DNAJB2, EFN1, GJA1, SMCHD1, CCNB1, TMSB4X, WDR5, HMOX1, MAP2K3, SMAD4, TGFB1, RRM2, ACE, MMP2, FN1, TRIP4, CSNK1E, MID1, SREBF2, MID2, RHOB, TGFBR2, H1-2, MMP14, ERCC2, PLXNB2, TFAM, ADAM9, TCF4, ITGA5 |
| positive regulation of multicellular organismal process | 24 | 3.02E-06 | MAP2K3, ACVRL1, SMAD4, TGFB1, ACE, NOTCH1, TFRC, HMGB2, FN1, HMGB1, CSNK1E, PSEN1, THBS1, RHOB, TGFBR2, MMP14, GJA1, CCNB1, TMSB4X, PLXNB2, ADAM9, HMOX1, TCF4, ITGA5                                                                                                                                                       |

|                                                       |    |          |                                                                                                                                                                                                                                 |
|-------------------------------------------------------|----|----------|---------------------------------------------------------------------------------------------------------------------------------------------------------------------------------------------------------------------------------|
| epithelial cell migration                             | 11 | 3.25E-06 | MAP2K3, ACVRL1, TGFB1, NOTCH1, TMSB4X, ADAM9, HMOX1, HMGB1, THBS1, RHOB, TGFBR2                                                                                                                                                 |
| regulation of blood vessel endothelial cell migration | 8  | 3.41E-06 | MAP2K3, ACVRL1, TGFB1, NOTCH1, TMSB4X, HMOX1, HMGB1, THBS1                                                                                                                                                                      |
| epithelium migration                                  | 11 | 3.49E-06 | MAP2K3, ACVRL1, TGFB1, NOTCH1, TMSB4X, ADAM9, HMOX1, HMGB1, THBS1, RHOB, TGFBR2                                                                                                                                                 |
| tissue migration                                      | 11 | 4.02E-06 | MAP2K3, ACVRL1, TGFB1, NOTCH1, TMSB4X, ADAM9, HMOX1, HMGB1, THBS1, RHOB, TGFBR2                                                                                                                                                 |
| regulation of binding                                 | 11 | 4.31E-06 | DNAJB2, SMAD4, TGFB1, ACE, TMSB4X, ERCC2, HMGB2, HMOX1, HMGB1, CSNK1E, PSEN1                                                                                                                                                    |
| cellular response to chemical stimulus                | 31 | 4.35E-06 | ACVRL1, NOTCH1, TFRC, RNF14, HMGB2, HTRA1, MOSPD2, HMGB1, PSEN1, AGAP3, THBS1, HSPA13, GJA1, CCNB1, TMSB4X, ATP6V0A2, HMOX1, MAP2K3, SMAD4, TGFB1, ACE, MMP2, CRIM1, TRIP4, CSNK1E, SREBF2, RHOB, TGFBR2, SELENOS, ADAM9, ITGA5 |
| blood vessel development                              | 15 | 4.4E-06  | ACVRL1, TGFB1, ACE, NOTCH1, MMP2, FN1, HMGB1, PSEN1, THBS1, RHOB, TGFBR2, MMP14, EMCN, HMOX1, ITGA5                                                                                                                             |

|                                                    |    |          |                                                                                                                                                                                                                                                                                                    |
|----------------------------------------------------|----|----------|----------------------------------------------------------------------------------------------------------------------------------------------------------------------------------------------------------------------------------------------------------------------------------------------------|
| response to stress                                 | 37 | 4.45E-06 | H2AX, ACVRL1, NOTCH1, TFRC, HMGB2, HTRA1, HMGB1, PSEN1, AGAP3, THBS1, HSPA13, TIAL1, DNAJB2, GJA1, SMCHD1, CCNB1, DNAJB4, TMSB4X, HMOX1, MAP2K3, SMAD4, TGFB1, ACE, MMP2, FN1, CSNK1E, MID1, SREBF2, MID2, RHOB, TGFB2, DDB2, MMP14, SELENOS, ERCC2, ADAM9, ITGA5                                  |
| positive regulation of cell proliferation          | 17 | 4.86E-06 | ACVRL1, SMAD4, TGFB1, NOTCH1, TFRC, MMP2, HMGB2, HTRA1, FN1, HMGB1, THBS1, TGFB2, TIAL1, EFNB1, GJA1, CCNB1, HMOX1                                                                                                                                                                                 |
| embryo development ending in birth or egg hatching | 14 | 5.35E-06 | ACVRL1, RALA, SMAD4, TGFB1, RRM2, ACE, NOTCH1, ECE1, PSEN1, TGFB2, MMP14, CCNB1, ERCC2, PLXNB2                                                                                                                                                                                                     |
| regulation of endothelial cell migration           | 9  | 5.94E-06 | MAP2K3, ACVRL1, TGFB1, NOTCH1, TMSB4X, HMOX1, HMGB1, THBS1, RHOB                                                                                                                                                                                                                                   |
| multicellular organism development                 | 43 | 6.42E-06 | H2AX, ACVRL1, RALA, NOTCH1, TFRC, KDELR1, HMGB2, HTRA1, ECE1, HMGB1, PSEN1, THBS1, IRF2BPL, EFNB1, GJA1, SMCHD1, CCNB1, HERC1, WDR5, HMOX1, MAP2K3, SMAD4, TGFB1, RRM2, ACE, MMP2, FN1, CRIM1, CSNK1E, MID1, RHOB, TGFB2, BACE2, MMP14, EMCN, TMX2, ERCC2, MYL3, PLXNB2, ADAM9, TCF4, ITGA5, ITM2B |

|                                         |    |          |                                                                                                                                                                                                                                                                                         |
|-----------------------------------------|----|----------|-----------------------------------------------------------------------------------------------------------------------------------------------------------------------------------------------------------------------------------------------------------------------------------------|
| blood vessel morphogenesis              | 14 | 6.54E-06 | ACVRL1, TGFB1, ACE, NOTCH1, MMP2, FN1, HMGB1, THBS1, RHOB, TGFBR2, MMP14, EMCN, HMOX1, ITGA5                                                                                                                                                                                            |
| system development                      | 41 | 6.82E-06 | H2AX, ACVRL1, RALA, NOTCH1, TFRC, KDELR1, HMGB2, HTRA1, ECE1, HMGB1, PSEN1, THBS1, IRF2BPL, EFNB1, GJA1, SMCHD1, CCNB1, HERC1, WDR5, HMOX1, MAP2K3, SMAD4, TGFB1, ACE, MMP2, FN1, CRIM1, CSNK1E, RHOB, TGFBR2, BACE2, MMP14, EMCN, TMX2, ERCC2, MYL3, PLXNB2, ADAM9, TCF4, ITGA5, ITM2B |
| blood vessel endothelial cell migration | 8  | 7.95E-06 | MAP2K3, ACVRL1, TGFB1, NOTCH1, TMSB4X, HMOX1, HMGB1, THBS1                                                                                                                                                                                                                              |
| angiogenesis                            | 13 | 8.25E-06 | ACVRL1, ACE, NOTCH1, MMP2, FN1, HMGB1, THBS1, RHOB, TGFBR2, MMP14, EMCN, HMOX1, ITGA5                                                                                                                                                                                                   |
| cardiovascular system development       | 15 | 8.27E-06 | ACVRL1, TGFB1, ACE, NOTCH1, MMP2, FN1, HMGB1, PSEN1, THBS1, RHOB, TGFBR2, MMP14, EMCN, HMOX1, ITGA5                                                                                                                                                                                     |
| vasculature development                 | 15 | 8.27E-06 | ACVRL1, TGFB1, ACE, NOTCH1, MMP2, FN1, HMGB1, PSEN1, THBS1, RHOB, TGFBR2, MMP14, EMCN, HMOX1, ITGA5                                                                                                                                                                                     |
| nervous system development              | 27 | 9.7E-06  | H2AX, RALA, NOTCH1, HMGB2, ECE1, HMGB1, PSEN1, IRF2BPL, EFNB1, GJA1, HERC1, WDR5, SMAD4, TGFB1,                                                                                                                                                                                         |

|                                           |    |          |                                                                                                                                                                              |
|-------------------------------------------|----|----------|------------------------------------------------------------------------------------------------------------------------------------------------------------------------------|
|                                           |    |          | ACE, MMP2, FN1, CRIM1, CSNK1E, TGFBR2, BACE2, MMP14, TMX2, ERCC2, PLXNB2, TCF4, ITM2B                                                                                        |
| positive regulation of gene expression    | 25 | 9.76E-06 | ACVRL1, NOTCH1, TFRC, RNF14, HMGB2, HMGB1, PSEN1, THBS1, LARP1B, IRF2BPL, GJA1, CCNB1, WDR5, MAP2K3, SMAD4, TGFB1, FN1, TRIP4, SREBF2, MID2, H1-2, MMP14, PLXNB2, TFAM, TCF4 |
| wound healing                             | 12 | 9.93E-06 | ACVRL1, GJA1, SMAD4, CCNB1, TGFB1, NOTCH1, FN1, HMOX1, HMGB1, ITGA5, THBS1, TGFBR2                                                                                           |
| regulation of cell adhesion               | 15 | 1.01E-05 | ACVRL1, TGFB1, NOTCH1, TFRC, MMP2, FN1, HMGB1, THBS1, TGFBR2, EFNB1, MMP14, EMCN, PLXNB2, ADAM9, ITGA5                                                                       |
| embryonic morphogenesis                   | 13 | 1.05E-05 | RALA, SMAD4, TGFB1, NOTCH1, MMP2, FN1, ECE1, PSEN1, TGFBR2, MMP14, GJA1, PLXNB2, ITGA5                                                                                       |
| movement of cell or subcellular component | 25 | 1.07E-05 | ACVRL1, NOTCH1, HMGB2, MOSPD2, ECE1, HMGB1, PSEN1, THBS1, EFNB1, GJA1, TMSB4X, HMOX1, MAP2K3, SMAD4, TGFB1, ACE, MMP2, FN1, RHOB, TGFBR2, MMP14, MYL1, PLXNB2, ADAM9, ITGA5  |
| regulation of stem cell proliferation     | 7  | 1.17E-05 | TIAL1, GJA1, TGFB1, NOTCH1, ACE, HMGB2, TGFBR2                                                                                                                               |

|                                         |    |          |                                                                                                                                                                                                                              |
|-----------------------------------------|----|----------|------------------------------------------------------------------------------------------------------------------------------------------------------------------------------------------------------------------------------|
| localization of cell                    | 22 | 1.17E-05 | MAP2K3, ACVRL1, TGFB1, ACE, NOTCH1, MMP2, HMGB2, MOSPD2, FN1, HMGB1, PSEN1, THBS1, RHOB, TGFB2, EFN1, MMP14, GJA1, TMSB4X, PLXNB2, ADAM9, HMOX1, ITGA5                                                                       |
| cell motility                           | 22 | 1.17E-05 | MAP2K3, ACVRL1, TGFB1, ACE, NOTCH1, MMP2, HMGB2, MOSPD2, FN1, HMGB1, PSEN1, THBS1, RHOB, TGFB2, EFN1, MMP14, GJA1, TMSB4X, PLXNB2, ADAM9, HMOX1, ITGA5                                                                       |
| epithelial tube morphogenesis           | 10 | 1.3E-05  | ACVRL1, MMP14, SMAD4, RALA, TGFB1, NOTCH1, PLXNB2, PSEN1, RHOB, TGFB2                                                                                                                                                        |
| regulation of protein metabolic process | 32 | 1.34E-05 | ACVRL1, NOTCH1, TFRC, RNF14, ECE1, HMGB1, PSEN1, THBS1, LARP1B, TIAL1, DNAJB2, GJA1, ATXN2, CCNB1, HINT2, WDR5, MAP2K3, SMAD4, TGFB1, ACE, FN1, CRIM1, TRIP4, CSNK1E, MID1, TGFB2, BACE2, MMP14, PLXNB2, ADAM9, ITGA5, ITM2B |
| tissue remodeling                       | 8  | 1.51E-05 | ACVRL1, MMP14, GJA1, TGFB1, ACE, TFRC, MMP2, HMGB1                                                                                                                                                                           |
| cellular component assembly             | 30 | 1.52E-05 | H2AX, ACVRL1, RALA, NOTCH1, TFRC, HMGB2, HMGB1, PSEN1, THBS1, DNAJB2, GJA1, ATXN2, SMCHD1, CCNB1,                                                                                                                            |

|                                  |    |          |                                                                                                                                                                                                                                                                                                                  |
|----------------------------------|----|----------|------------------------------------------------------------------------------------------------------------------------------------------------------------------------------------------------------------------------------------------------------------------------------------------------------------------|
|                                  |    |          | TMSB4X, TK1, SMAD4, TGFB1, RRM2, ACE, FN1, TTC17, H1-2, MMP14, ERCC2, PLXNB2, TFAM, PREB, TCF4, ITGA5                                                                                                                                                                                                            |
| anatomical structure development | 45 | 1.53E-05 | H2AX, ACVRL1, RALA, NOTCH1, TFRC, KDELR1, HMGB2, HTRA1, ECE1, HMGB1, PSEN1, THBS1, IRF2BPL, TIAL1, EFNB1, GJA1, SMCHD1, CCNB1, HERC1, WDR5, HMOX1, MAP2K3, SMAD4, TGFB1, RRM2, ACE, MMP2, FN1, CRIM1, TRIP4, CSNK1E, MID1, RHOB, TGFB2, BACE2, MMP14, EMCN, TMX2, ERCC2, MYL3, PLXNB2, ADAM9, TCF4, ITGA5, ITM2B |
| response to lipid                | 16 | 1.59E-05 | MAP2K3, TGFB1, ACE, NOTCH1, TFRC, RNF14, MMP2, HMGB2, TRIP4, HMGB1, THBS1, TGFB2, GJA1, CCNB1, SELENOS, ADAM9                                                                                                                                                                                                    |
| regulation of DNA binding        | 7  | 1.61E-05 | TGFB1, TMSB4X, ERCC2, HMGB2, HMOX1, HMGB1, PSEN1                                                                                                                                                                                                                                                                 |
| response to wounding             | 13 | 1.72E-05 | ACVRL1, SMAD4, TGFB1, NOTCH1, MMP2, FN1, HMGB1, THBS1, TGFB2, GJA1, CCNB1, HMOX1, ITGA5                                                                                                                                                                                                                          |
| regulation of localization       | 29 | 1.77E-05 | ACVRL1, RALA, NOTCH1, TFRC, MOSPD2, HMGB1, PSEN1, THBS1, DNAJB2, GJA1, ATXN2, TMSB4X, HMOX1, MAP2K3, SMAD4, TGFB1, ACE, MMP2, FN1, CSNK1E,                                                                                                                                                                       |

|                                                                |    |          |                                                                                                                                                                                                                                                                                                                                                             |
|----------------------------------------------------------------|----|----------|-------------------------------------------------------------------------------------------------------------------------------------------------------------------------------------------------------------------------------------------------------------------------------------------------------------------------------------------------------------|
|                                                                |    |          | SREBF2, RHOB, TGFBR2, MMP14, SELENOS, PLXNB2, ADAM9, PREB, ITGA5                                                                                                                                                                                                                                                                                            |
| positive regulation of blood vessel endothelial cell migration | 6  | 1.82E-05 | MAP2K3, TGFB1, TMSB4X, HMOX1, HMGB1, THBS1                                                                                                                                                                                                                                                                                                                  |
| response to chemical                                           | 38 | 1.86E-05 | ACVRL1, RALA, NOTCH1, TFRC, RNF14, HMGB2, HTRA1, MOSPD2, ECE1, HMGB1, PSEN1, AGAP3, THBS1, HSPA13, DNAJB2, EFN1, GJA1, CCNB1, DNAJB4, TMSB4X, ATP6V0A2, HMOX1, MAP2K3, SMAD4, TGFB1, ACE, MMP2, CRIM1, TRIP4, CSNK1E, SREBF2, RHOB, TGFBR2, MMP14, SELENOS, PLXNB2, ADAM9, ITGA5                                                                            |
| regulation of cellular metabolic process                       | 49 | 1.89E-05 | H2AX, ACVRL1, TFRC, RNF14, HMGB2, ECE1, HMGB1, LARP1B, IRF2BPL, TIAL1, GJA1, SMCHD1, HINT2, HERC1, TMSB4X, WDR5, HMGB1P1, MAP2K3, CSNK1E, MID1, MID2, SREBF2, TGFBR2, BACE2, MMP14, SELENOS, ADAM9, TFAM, ITGA5, NOTCH1, HTRA1, PSEN1, THBS1, DNAJB2, ATXN2, CCNB1, ATP6V0A2, HMOX1, SMAD4, TGFB1, ACE, FN1, CRIM1, TRIP4, H1-2, ERCC2, PLXNB2, TCF4, ITM2B |



|                                                   |    |          |                                                                                                                                                                                           |
|---------------------------------------------------|----|----------|-------------------------------------------------------------------------------------------------------------------------------------------------------------------------------------------|
| regulation of anatomical structure morphogenesis  | 17 | 1.97E-05 | ACVRL1, RALA, SMAD4, TGFB1, NOTCH1, TFRC, FN1, HMGB1, PSEN1, THBS1, RHOB, TGFBR2, GJA1, PLXNB2, ADAM9, HMOX1, ITGA5                                                                       |
| chordate embryonic development                    | 13 | 2.06E-05 | ACVRL1, RALA, SMAD4, TGFB1, RRM2, NOTCH1, ECE1, PSEN1, TGFBR2, MMP14, CCNB1, ERCC2, PLXNB2                                                                                                |
| endothelial cell migration                        | 9  | 2.17E-05 | MAP2K3, ACVRL1, TGFB1, NOTCH1, TMSB4X, HMOX1, HMGB1, THBS1, RHOB                                                                                                                          |
| positive regulation of endothelial cell migration | 7  | 2.17E-05 | MAP2K3, TGFB1, TMSB4X, HMOX1, HMGB1, THBS1, RHOB                                                                                                                                          |
| aging                                             | 10 | 2.26E-05 | H2AX, MAP2K3, SMAD4, TGFB1, ACE, TFRC, MMP2, ERCC2, PSEN1, TGFBR2                                                                                                                         |
| cellular response to organic substance            | 26 | 2.31E-05 | ACVRL1, NOTCH1, TFRC, RNF14, HMGB2, HTRA1, HMGB1, PSEN1, THBS1, HSPA13, GJA1, CCNB1, TMSB4X, MAP2K3, SMAD4, TGFB1, ACE, MMP2, CRIM1, TRIP4, CSNK1E, SREBF2, TGFBR2, SELENOS, ADAM9, ITGA5 |
| cell proliferation                                | 23 | 2.44E-05 | ACVRL1, SMAD4, TGFB1, ACE, NOTCH1, TFRC, MMP2, HMGB2, HTRA1, FN1, HMGB1, PSEN1, THBS1, TGFBR2, TIAL1, DNAJB2, EFN1, MMP14, GJA1, CCNB1, ERCC2, PLXNB2, HMOX1                              |

|                                                                         |    |          |                                                                                                                                                                                                                         |
|-------------------------------------------------------------------------|----|----------|-------------------------------------------------------------------------------------------------------------------------------------------------------------------------------------------------------------------------|
| epithelial cell proliferation                                           | 11 | 2.67E-05 | ACVRL1, MMP14, GJA1, TGFB1, NOTCH1, HTRA1, HMGB2, HMOX1, HMGB1, PSEN1, THBS1                                                                                                                                            |
| cellular component biogenesis                                           | 31 | 2.69E-05 | H2AX, ACVRL1, RALA, NOTCH1, TFRC, HMGB2, HMGB1, PSEN1, THBS1, DNAJB2, GJA1, ATXN2, SMCHD1, CCNB1, TMSB4X, TK1, SMAD4, TGFB1, RRM2, ACE, FN1, TTC17, H1-2, MMP14, ERCC2, PLXNB2, TFAM, PREB, TCF4, SERINC1, ITGA5        |
| response to steroid hormone                                             | 10 | 2.78E-05 | TGFB1, NOTCH1, ACE, RNF14, HMGB2, ADAM9, TRIP4, HMGB1, THBS1, TGFBR2                                                                                                                                                    |
| response to organic substance                                           | 30 | 2.8E-05  | ACVRL1, NOTCH1, TFRC, RNF14, HMGB2, HTRA1, HMGB1, PSEN1, THBS1, HSPA13, DNAJB2, GJA1, CCNB1, DNAJB4, TMSB4X, HMOX1, MAP2K3, SMAD4, TGFB1, ACE, MMP2, CRIM1, TRIP4, CSNK1E, SREBF2, TGFBR2, MMP14, SELENOS, ADAM9, ITGA5 |
| positive regulation of nucleobase-containing compound metabolic process | 23 | 3.03E-05 | H2AX, MAP2K3, ACVRL1, SMAD4, TGFB1, NOTCH1, TFRC, RNF14, HMGB2, TRIP4, HMGB1, PSEN1, SREBF2, MID2, IRF2BPL, H1-2, SMCHD1, CCNB1, TMSB4X, ERCC2, WDR5, TFAM, TCF4                                                        |
| response to endogenous stimulus                                         | 21 | 3.07E-05 | ACVRL1, SMAD4, TGFB1, ACE, NOTCH1, RNF14, MMP2, CRIM1, HMGB2, HTRA1, TRIP4, HMGB1, CSNK1E, PSEN1,                                                                                                                       |

|                                           |    |          |                                                                                                                                                                                                                                                                                                                          |
|-------------------------------------------|----|----------|--------------------------------------------------------------------------------------------------------------------------------------------------------------------------------------------------------------------------------------------------------------------------------------------------------------------------|
|                                           |    |          | THBS1, SREBF2, TGFBR2, GJA1, SELENOS, ADAM9, HMOX1                                                                                                                                                                                                                                                                       |
| apoptotic process                         | 22 | 3.08E-05 | SMAD4, TGFB1, ACE, NOTCH1, TFRC, KDELRL1, MMP2, HMGB2, HTRA1, HMGB1, PSEN1, THBS1, RHOB, TGFBR2, TIAL1, GJA1, HINT2, SELENOS, ERCC2, HMOX1, ITGA5, TXNDC5                                                                                                                                                                |
| tube morphogenesis                        | 10 | 3.21E-05 | ACVRL1, MMP14, SMAD4, RALA, TGFB1, NOTCH1, PLXNB2, PSEN1, RHOB, TGFBR2                                                                                                                                                                                                                                                   |
| single-organism developmental process     | 46 | 4.1E-05  | H2AX, ACVRL1, RALA, NOTCH1, TFRC, KDELRL1, HMGB2, HTRA1, ECE1, HMGB1, PSEN1, THBS1, IRF2BPL, TIAL1, EFN1, GJA1, SMCHD1, CCNB1, HERC1, WDR5, HMOX1, MAP2K3, SMAD4, TGFB1, RRM2, ACE, MMP2, FN1, CRIM1, TRIP4, CSNK1E, NOC3L, MID1, RHOB, TGFBR2, BACE2, MMP14, EMCN, TMX2, ERCC2, MYL3, PLXNB2, ADAM9, TCF4, ITGA5, ITM2B |
| cellular response to endogenous stimulus  | 18 | 4.18E-05 | ACVRL1, SMAD4, TGFB1, ACE, NOTCH1, RNF14, MMP2, CRIM1, HTRA1, TRIP4, CSNK1E, PSEN1, THBS1, SREBF2, TGFBR2, GJA1, SELENOS, ADAM9                                                                                                                                                                                          |
| positive regulation of biological process | 46 | 5.66E-05 | H2AX, ACVRL1, RALA, NOTCH1, TFRC, RNF14, HMGB2, HTRA1, MOSPD2, ECE1, HMGB1, PSEN1, THBS1, LARP1B,                                                                                                                                                                                                                        |

|                                                 |    |          |                                                                                                                                                                                                                                                                                                                           |
|-------------------------------------------------|----|----------|---------------------------------------------------------------------------------------------------------------------------------------------------------------------------------------------------------------------------------------------------------------------------------------------------------------------------|
|                                                 |    |          | IRF2BPL, TIAL1, DNAJB2, EFN1, GJA1, SMCHD1, CCNB1, TMSB4X, WDR5, HMOX1, MAP2K3, SMAD4, TGFB1, RRM2, ACE, MMP2, FN1, TRIP4, CSNK1E, MID1, SREBF2, MID2, RHOB, TGFB2, H1-2, MMP14, ERCC2, PLXNB2, TFAM, ADAM9, TCF4, ITGA5                                                                                                  |
| anatomical structure morphogenesis              | 27 | 5.73E-05 | ACVRL1, RALA, NOTCH1, TFRC, HTRA1, ECE1, HMGB1, PSEN1, THBS1, EFN1, GJA1, HERC1, HMOX1, SMAD4, TGFB1, ACE, MMP2, FN1, RHOB, TGFB2, MMP14, EMCN, ERCC2, MYL3, PLXNB2, ADAM9, ITGA5                                                                                                                                         |
| regulation of cardiac muscle tissue development | 6  | 5.75E-05 | GJA1, SMAD4, CCNB1, TGFB1, NOTCH1, TGFB2                                                                                                                                                                                                                                                                                  |
| single-multicellular organism process           | 46 | 6.07E-05 | H2AX, ACVRL1, RALA, NOTCH1, TFRC, KDELR1, HMGB2, HTRA1, ECE1, HMGB1, PSEN1, THBS1, IRF2BPL, EFN1, GJA1, SMCHD1, CCNB1, HERC1, TMSB4X, POTEJ, WDR5, HMOX1, MAP2K3, SMAD4, TGFB1, RRM2, ACE, MMP2, FN1, CRIM1, CSNK1E, MID1, RHOB, TGFB2, BACE2, MMP14, EMCN, TMX2, SELENOS, ERCC2, MYL3, PLXNB2, ADAM9, TCF4, ITGA5, ITM2B |
| developmental process                           | 46 | 6.41E-05 | H2AX, ACVRL1, RALA, NOTCH1, TFRC, KDELR1, HMGB2, HTRA1, ECE1, HMGB1, PSEN1, THBS1, IRF2BPL, TIAL1, EFN1, GJA1, SMCHD1, CCNB1, HERC1, WDR5, HMOX1,                                                                                                                                                                         |

|                                                |    |          |                                                                                                                                                                                                              |
|------------------------------------------------|----|----------|--------------------------------------------------------------------------------------------------------------------------------------------------------------------------------------------------------------|
|                                                |    |          | MAP2K3, SMAD4, TGFB1, RRM2, ACE, MMP2, FN1, CRIM1, TRIP4, CSNK1E, NOC3L, MID1, RHOB, TGFB2, BACE2, MMP14, EMCN, TMX2, ERCC2, MYL3, PLXNB2, ADAM9, TCF4, ITGA5, ITM2B                                         |
| regulation of multicellular organismal process | 30 | 6.47E-05 | ACVRL1, NOTCH1, TFRC, HMGB2, ECE1, HMGB1, PSEN1, THBS1, GJA1, CCNB1, TMSB4X, WDR5, HMOX1, MAP2K3, SMAD4, TGFB1, ACE, MMP2, FN1, CRIM1, CSNK1E, RHOB, TGFB2, MMP14, SELENOS, MYL3, PLXNB2, ADAM9, TCF4, ITGA5 |
| positive regulation of response to stimulus    | 25 | 6.64E-05 | H2AX, ACVRL1, NOTCH1, TFRC, HMGB2, MOSPD2, HMGB1, PSEN1, THBS1, TIAL1, GJA1, SMCHD1, TMSB4X, HMOX1, MAP2K3, SMAD4, TGFB1, ACE, FN1, CSNK1E, MID1, MID2, TGFB2, ADAM9, ITGA5                                  |
| chemotaxis                                     | 12 | 6.64E-05 | EFNB1, SMAD4, RALA, TGFB1, NOTCH1, TMSB4X, MOSPD2, HMGB2, PLXNB2, ECE1, HMGB1, THBS1                                                                                                                         |
| positive regulation of vasculature development | 8  | 6.96E-05 | ACVRL1, NOTCH1, HMOX1, HMGB1, ITGA5, THBS1, RHOB, TGFB2                                                                                                                                                      |
| regulation of primary metabolic process        | 47 | 7.01E-05 | H2AX, ACVRL1, NOTCH1, TFRC, RNF14, HMGB2, HTRA1, ECE1, HMGB1, PSEN1, THBS1, LARP1B, IRF2BPL, TIAL1, DNAJB2, GJA1, ATXN2, SMCHD1, CCNB1, HINT2,                                                               |

|                                         |    |          |                                                                                                                                                                                                                                                                                                   |
|-----------------------------------------|----|----------|---------------------------------------------------------------------------------------------------------------------------------------------------------------------------------------------------------------------------------------------------------------------------------------------------|
|                                         |    |          | TMSB4X, WDR5, HMOX1, HMGB1P1, MAP2K3, SMAD4, TGFB1, ACE, FN1, CRIM1, TRIP4, CSNK1E, MID1, SREBF2, MID2, TGFBR2, H1-2, BACE2, MMP14, SELENOS, ERCC2, PLXNB2, TFAM, ADAM9, TCF4, ITGA5, ITM2B                                                                                                       |
| taxis                                   | 12 | 7.02E-05 | EFNB1, SMAD4, RALA, TGFB1, NOTCH1, TMSB4X, MOSPD2, HMGB2, PLXNB2, ECE1, HMGB1, THBS1                                                                                                                                                                                                              |
| neurogenesis                            | 20 | 7.07E-05 | SMAD4, TGFB1, ACE, NOTCH1, MMP2, HMGB2, FN1, ECE1, HMGB1, CSNK1E, PSEN1, BACE2, EFNB1, MMP14, GJA1, HERC1, ERCC2, WDR5, PLXNB2, TCF4                                                                                                                                                              |
| negative regulation of cellular process | 41 | 7.8E-05  | H2AX, ACVRL1, NOTCH1, TFRC, HMGB2, HTRA1, HMGB1, PSEN1, THBS1, IRF2BPL, TIAL1, DNAJB2, GJA1, ATXN2, SMCHD1, CCNB1, HINT2, HERC1, TMSB4X, WDR5, HMOX1, TXNDC5, MAP2K3, SMAD4, TGFB1, ACE, MMP2, CRIM1, CSNK1E, MID1, SREBF2, MID2, RHOB, TGFBR2, H1-2, BACE2, MMP14, SELENOS, PLXNB2, ITGA5, ITM2B |
| negative regulation of transport        | 11 | 7.95E-05 | ATXN2, GJA1, TGFB1, NOTCH1, ACE, SELENOS, TMSB4X, HMOX1, HMGB1, THBS1, SREBF2                                                                                                                                                                                                                     |
| response to external stimulus           | 26 | 8.57E-05 | RALA, NOTCH1, TFRC, HMGB2, HTRA1, MOSPD2, ECE1, HMGB1, THBS1, EFNB1, GJA1, CCNB1, TMSB4X, HMOX1,                                                                                                                                                                                                  |

|                                                     |    |          |                                                                                                                                                                                                                                                                                                                                           |
|-----------------------------------------------------|----|----------|-------------------------------------------------------------------------------------------------------------------------------------------------------------------------------------------------------------------------------------------------------------------------------------------------------------------------------------------|
|                                                     |    |          | HMG2, MAP2K3, SMAD4, TGFB1, ACE, MMP2, SREBF2, TGFB2, MMP14, SELENOS, PLXNB2, ADAM9                                                                                                                                                                                                                                                       |
| stem cell proliferation                             | 7  | 8.63E-05 | TIAL1, GJA1, TGFB1, NOTCH1, ACE, ERCC2, PLXNB2                                                                                                                                                                                                                                                                                            |
| programmed cell death                               | 22 | 9.05E-05 | SMAD4, TGFB1, ACE, NOTCH1, TFRC, KDELR1, MMP2, HMGB2, HTRA1, HMGB1, PSEN1, THBS1, RHOB, TGFB2, TIAL1, GJA1, HINT2, SELENOS, ERCC2, HMOX1, ITGA5, TXNDC5                                                                                                                                                                                   |
| positive regulation of protein modification process | 17 | 0.0001   | MAP2K3, ACVRL1, SMAD4, TGFB1, ACE, NOTCH1, TFRC, HMGB1, PSEN1, THBS1, MID1, TGFB2, DNAJB2, CCNB1, WDR5, ADAM9, ITGA5                                                                                                                                                                                                                      |
| regulation of macromolecule metabolic process       | 47 | 0.000101 | H2AX, ACVRL1, NOTCH1, TFRC, RNF14, HMGB2, HTRA1, ECE1, HMGB1, PSEN1, THBS1, LARP1B, IRF2BPL, TIAL1, DNAJB2, GJA1, ATXN2, SMCHD1, CCNB1, HINT2, TMSB4X, WDR5, HMOX1, HMGB1P1, MAP2K3, SMAD4, TGFB1, ACE, FN1, CRIM1, TRIP4, CSNK1E, MID1, SREBF2, MID2, TGFB2, H1-2, BACE2, MMP14, SELENOS, ERCC2, PLXNB2, TFAM, ADAM9, TCF4, ITGA5, ITM2B |
| muscle cell proliferation                           | 8  | 0.000101 | GJA1, CCNB1, TGFB1, NOTCH1, MMP2, HMOX1, THBS1, TGFB2                                                                                                                                                                                                                                                                                     |

|                                                         |    |          |                                                                                                                                                                                                                                                                                                                                                             |
|---------------------------------------------------------|----|----------|-------------------------------------------------------------------------------------------------------------------------------------------------------------------------------------------------------------------------------------------------------------------------------------------------------------------------------------------------------------|
| positive regulation of protein phosphorylation          | 15 | 0.000107 | MAP2K3, ACVRL1, SMAD4, TGFB1, ACE, NOTCH1, TFRC, HMGB1, PSEN1, THBS1, MID1, TGFBR2, CCNB1, ADAM9, ITGA5                                                                                                                                                                                                                                                     |
| response to organic cyclic compound                     | 15 | 0.000108 | TGFB1, ACE, NOTCH1, RNF14, MMP2, HMGB2, TRIP4, HMGB1, THBS1, TGFBR2, MMP14, GJA1, CCNB1, ADAM9, HMOX1                                                                                                                                                                                                                                                       |
| response to carbohydrate                                | 8  | 0.000119 | MAP2K3, GJA1, SMAD4, TGFB1, ACE, SELENOS, THBS1, TGFBR2                                                                                                                                                                                                                                                                                                     |
| positive regulation of smooth muscle cell proliferation | 6  | 0.000127 | GJA1, TGFB1, MMP2, HMOX1, THBS1, TGFBR2                                                                                                                                                                                                                                                                                                                     |
| regulation of metabolic process                         | 49 | 0.000141 | H2AX, ACVRL1, TFRC, RNF14, HMGB2, ECE1, HMGB1, LARP1B, IRF2BPL, TIAL1, GJA1, SMCHD1, HINT2, HERC1, TMSB4X, WDR5, HMGB1P1, MAP2K3, CSNK1E, MID1, MID2, SREBF2, TGFBR2, BACE2, MMP14, SELENOS, ADAM9, TFAM, ITGA5, NOTCH1, HTRA1, PSEN1, THBS1, DNAJB2, ATXN2, CCNB1, ATP6V0A2, HMOX1, SMAD4, TGFB1, ACE, FN1, CRIM1, TRIP4, H1-2, ERCC2, PLXNB2, TCF4, ITM2B |
| gastrulation                                            | 7  | 0.000148 | MMP14, GJA1, SMAD4, MMP2, FN1, ITGA5, TGFBR2                                                                                                                                                                                                                                                                                                                |



|                                                                                                 |    |          |                                                                                                                                                                                      |
|-------------------------------------------------------------------------------------------------|----|----------|--------------------------------------------------------------------------------------------------------------------------------------------------------------------------------------|
| epithelium development                                                                          | 16 | 0.00015  | ACVRL1, RALA, SMAD4, TGFB1, NOTCH1, MMP2, ECE1, PSEN1, RHOB, TGFBR2, MMP14, GJA1, ERCC2, PLXNB2, ADAM9, ITGA5                                                                        |
| positive regulation of signal transduction                                                      | 19 | 0.000158 | MAP2K3, ACVRL1, SMAD4, TGFB1, NOTCH1, TFRC, FN1, HMGB1, CSNK1E, PSEN1, THBS1, MID1, MID2, TGFBR2, TIAL1, GJA1, ADAM9, HMOX1, ITGA5                                                   |
| positive regulation of phosphate metabolic process                                              | 16 | 0.000159 | MAP2K3, ACVRL1, SMAD4, TGFB1, ACE, NOTCH1, TFRC, HMGB1, PSEN1, THBS1, MID1, TGFBR2, CCNB1, TMSB4X, ADAM9, ITGA5                                                                      |
| positive regulation of phosphorus metabolic process                                             | 16 | 0.000159 | MAP2K3, ACVRL1, SMAD4, TGFB1, ACE, NOTCH1, TFRC, HMGB1, PSEN1, THBS1, MID1, TGFBR2, CCNB1, TMSB4X, ADAM9, ITGA5                                                                      |
| positive regulation of transmembrane receptor protein serine/threonine kinase signaling pathway | 6  | 0.000161 | ACVRL1, SMAD4, TGFB1, NOTCH1, THBS1, TGFBR2                                                                                                                                          |
| cellular developmental process                                                                  | 35 | 0.000162 | H2AX, ACVRL1, NOTCH1, TFRC, KDEL1, HMGB2, HTRA1, ECE1, HMGB1, PSEN1, TIAL1, EFN1, GJA1, CCNB1, HERC1, WDR5, MAP2K3, SMAD4, TGFB1, ACE, MMP2, FN1, CRIM1, TRIP4, CSNK1E, NOC3L, RHOB, |

|                                             |    |          |                                                                                                                                    |
|---------------------------------------------|----|----------|------------------------------------------------------------------------------------------------------------------------------------|
|                                             |    |          | TGFBR2, BACE2, MMP14, ERCC2, PLXNB2, ADAM9, TCF4, ITGA5                                                                            |
| response to lipopolysaccharide              | 9  | 0.000164 | MAP2K3, GJA1, TGFB1, NOTCH1, ACE, SELENOS, HMGB2, ADAM9, HMGB1                                                                     |
| regulation of cellular component biogenesis | 15 | 0.000171 | ACVRL1, RALA, SMAD4, TGFB1, ACE, NOTCH1, TFRC, HMGB1, THBS1, DNAJB2, MMP14, ATXN2, GJA1, TMSB4X, PREB                              |
| positive regulation of molecular function   | 19 | 0.000177 | MAP2K3, TGFB1, ACE, TFRC, HMGB2, FN1, HMGB1, AGAP3, PSEN1, THBS1, MID2, TGFBR2, DNAJB2, CCNB1, TMSB4X, ERCC2, MYL3, ADAM9, SERINC1 |
| DNA metabolic process                       | 15 | 0.000178 | H2AX, ACVRL1, TGFB1, RRM2, TFRC, HMGB2, HMGB1, CSNK1E, NOC3L, DDB2, H1-2, GJA1, SMCHD1, ERCC2, TK1                                 |
| positive regulation of cell differentiation | 15 | 0.00018  | ACVRL1, SMAD4, TGFB1, ACE, NOTCH1, HMGB2, FN1, HMGB1, CSNK1E, PSEN1, TGFBR2, MMP14, GJA1, PLXNB2, TCF4                             |
| regulation of developmental process         | 26 | 0.000187 | ACVRL1, RALA, NOTCH1, TFRC, HMGB2, HMGB1, PSEN1, THBS1, GJA1, CCNB1, WDR5, HMOX1, SMAD4, TGFB1,                                    |

|                                               |    |          |                                                                                                                                                                                                                                                                                                        |
|-----------------------------------------------|----|----------|--------------------------------------------------------------------------------------------------------------------------------------------------------------------------------------------------------------------------------------------------------------------------------------------------------|
|                                               |    |          | ACE, FN1, CRIM1, TRIP4, CSNK1E, RHOB, TGFBR2, MMP14, PLXNB2, ADAM9, TCF4, ITGA5                                                                                                                                                                                                                        |
| regulation of cellular component organization | 26 | 0.000194 | ACVRL1, RALA, NOTCH1, TFRC, HMGB1, PSEN1, THBS1, DNAJB2, GJA1, ATXN2, CCNB1, TMSB4X, WDR5, SMAD4, TGFB1, ACE, FN1, CRIM1, MID1, SREBF2, RHOB, H1-2, MMP14, PLXNB2, ADAM9, PREB                                                                                                                         |
| endothelial cell proliferation                | 7  | 0.000195 | ACVRL1, MMP14, GJA1, HMGB2, HMOX1, HMGB1, THBS1                                                                                                                                                                                                                                                        |
| negative regulation of biological process     | 42 | 0.000197 | H2AX, ACVRL1, NOTCH1, TFRC, HMGB2, HTRA1, HMGB1, PSEN1, THBS1, IRF2BPL, TIAL1, DNAJB2, GJA1, ATXN2, SMCHD1, CCNB1, HINT2, HERC1, TMSB4X, WDR5, HMOX1, TXNDC5, MAP2K3, SMAD4, TGFB1, ACE, MMP2, FN1, CRIM1, CSNK1E, MID1, SREBF2, MID2, RHOB, TGFBR2, H1-2, BACE2, MMP14, SELENOS, PLXNB2, ITGA5, ITM2B |
| regulation of molecular function              | 28 | 0.000199 | NOTCH1, TFRC, HMGB2, HMGB1, PSEN1, AGAP3, THBS1, DNAJB2, GJA1, CCNB1, HERC1, TMSB4X, HMOX1, MAP2K3, SMAD4, TGFB1, ACE, FN1, CRIM1, CSNK1E, MID2, TGFBR2, ERCC2, MYL3, PLXNB2, ADAM9, PREB, SERINC1                                                                                                     |

|                                                                                        |    |          |                                                                                                                                          |
|----------------------------------------------------------------------------------------|----|----------|------------------------------------------------------------------------------------------------------------------------------------------|
| positive regulation of signaling                                                       | 20 | 0.000211 | MAP2K3, ACVRL1, SMAD4, TGFB1, NOTCH1, TFRC, FN1, ECE1, HMGB1, CSNK1E, PSEN1, THBS1, MID1, MID2, TGFBR2, TIAL1, GJA1, ADAM9, HMOX1, ITGA5 |
| positive regulation of phosphorylation                                                 | 15 | 0.000214 | MAP2K3, ACVRL1, SMAD4, TGFB1, ACE, NOTCH1, TFRC, HMGB1, PSEN1, THBS1, MID1, TGFBR2, CCNB1, ADAM9, ITGA5                                  |
| regulation of transmembrane receptor protein serine/threonine kinase signaling pathway | 8  | 0.000216 | ACVRL1, SMAD4, TGFB1, NOTCH1, CRIM1, HTRA1, THBS1, TGFBR2                                                                                |
| transforming growth factor beta receptor signaling pathway                             | 7  | 0.000223 | ACVRL1, SMAD4, TGFB1, HTRA1, ADAM9, THBS1, TGFBR2                                                                                        |
| cardiac ventricle morphogenesis                                                        | 5  | 0.000229 | SMAD4, TGFB1, NOTCH1, MYL3, TGFBR2                                                                                                       |
| cellular response to growth factor stimulus                                            | 12 | 0.000232 | MAP2K3, ACVRL1, SMAD4, TGFB1, NOTCH1, CRIM1, HTRA1, ADAM9, CSNK1E, ITGA5, THBS1, TGFBR2                                                  |
| response to molecule of bacterial origin                                               | 9  | 0.000237 | MAP2K3, GJA1, TGFB1, NOTCH1, ACE, SELENOS, HMGB2, ADAM9, HMGB1                                                                           |
| transmembrane receptor protein serine/threonine kinase signaling pathway               | 9  | 0.000237 | ACVRL1, SMAD4, TGFB1, NOTCH1, CRIM1, HTRA1, ADAM9, THBS1, TGFBR2                                                                         |

|                                                  |    |          |                                                                                                                                                                                                            |
|--------------------------------------------------|----|----------|------------------------------------------------------------------------------------------------------------------------------------------------------------------------------------------------------------|
| cell junction organization                       | 8  | 0.000245 | ACVRL1, MMP14, GJA1, TGFB1, ACE, FN1, ITGA5, THBS1                                                                                                                                                         |
| cellular response to stress                      | 21 | 0.000248 | H2AX, MAP2K3, NOTCH1, MMP2, HMGB2, HMGB1, CSNK1E, AGAP3, PSEN1, THBS1, MID1, HSPA13, SREBF2, RHOB, DDB2, DNAJB2, SMCHD1, CCNB1, SELENOS, ERCC2, HMOX1                                                      |
| animal organ development                         | 30 | 0.00027  | H2AX, ACVRL1, NOTCH1, TFRC, KDEL1, HMGB2, HTRA1, ECE1, HMGB1, PSEN1, EFN1, GJA1, SMCHD1, CCNB1, HERC1, HMOX1, MAP2K3, SMAD4, TGFB1, ACE, MMP2, FN1, CSNK1E, TGFB2, MMP14, TMX2, ERCC2, MYL3, PLXNB2, ADAM9 |
| cell death                                       | 22 | 0.000271 | SMAD4, TGFB1, ACE, NOTCH1, TFRC, KDEL1, MMP2, HMGB2, HTRA1, HMGB1, PSEN1, THBS1, RHOB, TGFB2, TIAL1, GJA1, HINT2, SELENOS, ERCC2, HMOX1, ITGA5, TXNDC5                                                     |
| regulation of cellular protein metabolic process | 28 | 0.000276 | ACVRL1, NOTCH1, TFRC, RNF14, HMGB1, PSEN1, THBS1, LARP1B, TIAL1, DNAJB2, ATXN2, CCNB1, HINT2, WDR5, MAP2K3, SMAD4, TGFB1, ACE, FN1, CRIM1, TRIP4, CSNK1E, MID1, TGFB2, MMP14, PLXNB2, ADAM9, ITGA5         |

|                                                                |    |          |                                                                                                                                                                                                                                                                                                                             |
|----------------------------------------------------------------|----|----------|-----------------------------------------------------------------------------------------------------------------------------------------------------------------------------------------------------------------------------------------------------------------------------------------------------------------------------|
| regulation of multicellular organismal development             | 22 | 0.000278 | ACVRL1, SMAD4, TGFB1, ACE, NOTCH1, TFRC, HMGB2, FN1, HMGB1, CSNK1E, PSEN1, THBS1, RHOB, TGFB2, MMP14, GJA1, CCNB1, WDR5, PLXNB2, HMOX1, TCF4, ITGA5                                                                                                                                                                         |
| positive regulation of angiogenesis                            | 7  | 0.000287 | ACVRL1, HMOX1, HMGB1, ITGA5, THBS1, RHOB, TGFB2                                                                                                                                                                                                                                                                             |
| response to glucose                                            | 7  | 0.000287 | GJA1, SMAD4, TGFB1, ACE, SELENOS, THBS1, TGFB2                                                                                                                                                                                                                                                                              |
| generation of neurons                                          | 18 | 0.000307 | SMAD4, TGFB1, ACE, NOTCH1, MMP2, HMGB2, FN1, ECE1, HMGB1, CSNK1E, PSEN1, EFNB1, GJA1, HERC1, ERCC2, WDR5, PLXNB2, TCF4                                                                                                                                                                                                      |
| negative regulation of blood vessel endothelial cell migration | 5  | 0.000312 | ACVRL1, TGFB1, NOTCH1, HMGB1, THBS1                                                                                                                                                                                                                                                                                         |
| localization                                                   | 44 | 0.000316 | ACVRL1, RALA, NOTCH1, TFRC, KDELR1, HMGB2, MOSPD2, HMGB1, PSEN1, ANTXR2, THBS1, DNAJB2, EFNB1, CYB5R1, GJA1, ATXN2, CCNB1, FCGRT, TMSB4X, ATP6V0A2, HMOX1, ATP5MJ, TXNDC5, MAP2K3, SMAD4, TGFB1, ACE, MMP2, OSBPL3, FN1, TRIP4, CSNK1E, MID1, SREBF2, MID2, RHOB, TGFB2, MMP14, SELENOS, PLXNB2, ADAM9, PREB, KDELR2, ITGA5 |

|                                           |    |          |                                                                                                                                    |
|-------------------------------------------|----|----------|------------------------------------------------------------------------------------------------------------------------------------|
| response to growth factor                 | 12 | 0.000329 | MAP2K3, ACVRL1, SMAD4, TGFB1, NOTCH1, CRIM1, HTRA1, ADAM9, CSNK1E, ITGA5, THBS1, TGFBR2                                            |
| response to oxygen-containing compound    | 19 | 0.000332 | MAP2K3, SMAD4, TGFB1, ACE, NOTCH1, TFRC, MMP2, HMGB2, HMGB1, AGAP3, PSEN1, THBS1, RHOB, TGFBR2, GJA1, CCNB1, SELENOS, ADAM9, HMOX1 |
| regeneration                              | 7  | 0.000332 | CCNB1, TGFB1, NOTCH1, ACE, MMP2, HMOX1, TGFBR2                                                                                     |
| positive regulation of catalytic activity | 16 | 0.000333 | MAP2K3, TGFB1, ACE, HMGB2, FN1, HMGB1, AGAP3, PSEN1, THBS1, TGFBR2, DNAJB2, CCNB1, TMSB4X, MYL3, ADAM9, SERINC1                    |
| positive regulation of apoptotic process  | 11 | 0.000339 | SMAD4, TGFB1, NOTCH1, ACE, MMP2, HTRA1, HMOX1, HMGB1, PSEN1, THBS1, RHOB                                                           |
| response to hexose                        | 7  | 0.00034  | GJA1, SMAD4, TGFB1, ACE, SELENOS, THBS1, TGFBR2                                                                                    |
| respiratory system development            | 7  | 0.00034  | SMCHD1, MMP14, TGFB1, NOTCH1, ACE, HMGB1, TGFBR2                                                                                   |
| negative regulation of cell adhesion      | 8  | 0.000342 | ACVRL1, MMP14, TGFB1, NOTCH1, MMP2, PLXNB2, HMGB1, THBS1                                                                           |
| cellular response to lipid                | 11 | 0.000343 | MAP2K3, CCNB1, TGFB1, ACE, SELENOS, RNF14, MMP2, HMGB2, ADAM9, TRIP4, HMGB1                                                        |

|                                                |    |          |                                                                                                                                                                                                                                                |
|------------------------------------------------|----|----------|------------------------------------------------------------------------------------------------------------------------------------------------------------------------------------------------------------------------------------------------|
| developmental process involved in reproduction | 12 | 0.000363 | TIAL1, MMP14, GJA1, SMAD4, CCNB1, TGFB1, NOTCH1, ACE, MMP2, HTRA1, HMGB2, IRF2BPL                                                                                                                                                              |
| organic cyclic compound biosynthetic process   | 34 | 0.000366 | H2AX, ACVRL1, GTF3C1, NOTCH1, TFRC, RNF14, HMGB2, HTRA1, HMGB1, PSEN1, IRF2BPL, TIAL1, CYB5R1, GJA1, HINT2, TMSB4X, WDR5, HMOX1, ATP5MJ, TK1, HMGB1P1, MAP2K3, SMAD4, TGFB1, RRM2, OSBPL3, CRIM1, TRIP4, SREBF2, MID2, H1-2, ERCC2, TFAM, TCF4 |
| positive regulation of programmed cell death   | 11 | 0.000373 | SMAD4, TGFB1, NOTCH1, ACE, MMP2, HTRA1, HMOX1, HMGB1, PSEN1, THBS1, RHOB                                                                                                                                                                       |
| regulation of epithelial cell proliferation    | 9  | 0.000375 | ACVRL1, GJA1, TGFB1, NOTCH1, HTRA1, HMGB2, HMOX1, HMGB1, THBS1                                                                                                                                                                                 |
| regulation of signal transduction              | 27 | 0.000376 | ACVRL1, NOTCH1, TFRC, RNF14, HMGB2, HTRA1, HMGB1, PSEN1, THBS1, TIAL1, GJA1, TMSB4X, HMOX1, MAP2K3, SMAD4, TGFB1, FN1, CRIM1, CSNK1E, MID1, SREBF2, MID2, TGFBR2, MMP14, SELENOS, ADAM9, ITGA5                                                 |
| regulation of protein modification process     | 20 | 0.000378 | MAP2K3, ACVRL1, SMAD4, TGFB1, ACE, NOTCH1, TFRC, FN1, HMGB1, PSEN1, THBS1, MID1, TGFBR2, DNAJB2, CCNB1, HINT2, WDR5, PLXNB2, ADAM9, ITGA5                                                                                                      |



|                                                      |    |          |                                                                                                                                                                                                                                  |
|------------------------------------------------------|----|----------|----------------------------------------------------------------------------------------------------------------------------------------------------------------------------------------------------------------------------------|
| positive regulation of epithelial cell proliferation | 7  | 0.000382 | ACVRL1, TGFB1, NOTCH1, HTRA1, HMGB2, HMOX1, HMGB1                                                                                                                                                                                |
| regulation of catabolic process                      | 13 | 0.000392 | SMAD4, RNF14, HMGB1, CSNK1E, PSEN1, SREBF2, MID2, DNAJB2, GJA1, HERC1, ATP6V0A2, ADAM9, HMOX1                                                                                                                                    |
| cell development                                     | 22 | 0.0004   | SMAD4, TGFB1, ACE, NOTCH1, MMP2, HMGB2, FN1, ECE1, HMGB1, CSNK1E, PSEN1, TGFBR2, TIAL1, BACE2, EFNB1, GJA1, CCNB1, HERC1, ERCC2, WDR5, PLXNB2, TCF4                                                                              |
| cell differentiation                                 | 33 | 0.000418 | ACVRL1, NOTCH1, TFRC, KDELR1, HMGB2, HTRA1, ECE1, HMGB1, PSEN1, TIAL1, EFNB1, GJA1, CCNB1, HERC1, WDR5, SMAD4, TGFB1, ACE, MMP2, FN1, CRIM1, TRIP4, CSNK1E, NOC3L, RHOB, TGFBR2, BACE2, MMP14, ERCC2, PLXNB2, ADAM9, TCF4, ITGA5 |
| inflammatory response                                | 12 | 0.000418 | MAP2K3, GJA1, TGFB1, NOTCH1, ACE, SELENOS, TFRC, HMGB2, FN1, HMOX1, HMGB1, THBS1                                                                                                                                                 |
| myeloid leukocyte activation                         | 7  | 0.000419 | TGFB1, ADAM9, HMOX1, HMGB1, PSEN1, THBS1, TGFBR2                                                                                                                                                                                 |
| regulation of biological quality                     | 32 | 0.000425 | ACVRL1, NOTCH1, RETSAT, TFRC, KDELR1, HMGB2, ECE1, HMGB1, PSEN1, THBS1, DNAJB2, GJA1, TMSB4X, POTEJ, ATP6V0A2, HMOX1, HMG2, SMAD4, TGFB1,                                                                                        |

|                                                      |    |          |                                                                                                                                                       |
|------------------------------------------------------|----|----------|-------------------------------------------------------------------------------------------------------------------------------------------------------|
|                                                      |    |          | ACE, MMP2, FN1, SREBF2, MID2, RHOB, BACE2, EMCN, SELENOS, ERCC2, MYL3, PLXNB2, KDELR2                                                                 |
| response to monosaccharide                           | 7  | 0.000429 | GJA1, SMAD4, TGFB1, ACE, SELENOS, THBS1, TGFBR2                                                                                                       |
| blood circulation                                    | 10 | 0.000447 | MAP2K3, ACVRL1, GJA1, TGFB1, ACE, MYL1, MMP2, MYL3, HMOX1, ECE1                                                                                       |
| positive regulation of cellular biosynthetic process | 21 | 0.000453 | MAP2K3, ACVRL1, SMAD4, TGFB1, NOTCH1, RNF14, HMGB2, TRIP4, HMGB1, PSEN1, THBS1, SREBF2, MID2, LARP1B, IRF2BPL, H1-2, TMSB4X, WDR5, PLXNB2, TFAM, TCF4 |
| regulation of striated muscle tissue development     | 6  | 0.000468 | GJA1, SMAD4, CCNB1, TGFB1, NOTCH1, TGFBR2                                                                                                             |
| proteolysis                                          | 19 | 0.000469 | TGFB1, ACE, RNF14, MMP2, CRIM1, HTRA1, FN1, TRIP4, ECE1, HMGB1, CSNK1E, AGAP3, PSEN1, THBS1, DNAJB2, BACE2, MMP14, SELENOS, ADAM9                     |
| response to mechanical stimulus                      | 7  | 0.000469 | MMP14, GJA1, CCNB1, TGFB1, MMP2, THBS1, TGFBR2                                                                                                        |
| animal organ regeneration                            | 5  | 0.000473 | TGFB1, NOTCH1, ACE, HMOX1, TGFBR2                                                                                                                     |

|                                         |    |          |                                                                                                                                                                                                           |
|-----------------------------------------|----|----------|-----------------------------------------------------------------------------------------------------------------------------------------------------------------------------------------------------------|
| regulation of protein phosphorylation   | 17 | 0.000474 | MAP2K3, ACVRL1, SMAD4, TGFB1, ACE, NOTCH1, TFRC, FN1, HMGB1, PSEN1, THBS1, MID1, TGFBR2, CCNB1, PLXNB2, ADAM9, ITGA5                                                                                      |
| regulation of cell proliferation        | 19 | 0.000478 | ACVRL1, SMAD4, TGFB1, ACE, NOTCH1, TFRC, MMP2, HMGB2, HTRA1, FN1, HMGB1, THBS1, TGFBR2, TIAL1, DNAJB2, EFNB1, GJA1, CCNB1, HMOX1                                                                          |
| negative regulation of locomotion       | 9  | 0.00048  | ACVRL1, GJA1, TGFB1, NOTCH1, HMOX1, HMGB1, THBS1, MID2, RHOB                                                                                                                                              |
| regulation of signaling                 | 29 | 0.000488 | ACVRL1, NOTCH1, TFRC, RNF14, HMGB2, HTRA1, ECE1, HMGB1, PSEN1, THBS1, TIAL1, GJA1, TMSB4X, HMOX1, MAP2K3, SMAD4, TGFB1, ACE, FN1, CRIM1, CSNK1E, MID1, SREBF2, MID2, TGFBR2, MMP14, SELENOS, ADAM9, ITGA5 |
| DNA recombination                       | 8  | 0.000503 | H2AX, SMCHD1, TGFB1, TFRC, ERCC2, HMGB2, HMGB1, H1-2                                                                                                                                                      |
| circulatory system process              | 10 | 0.00051  | MAP2K3, ACVRL1, GJA1, TGFB1, ACE, MYL1, MMP2, MYL3, HMOX1, ECE1                                                                                                                                           |
| regulation of muscle tissue development | 6  | 0.000526 | GJA1, SMAD4, CCNB1, TGFB1, NOTCH1, TGFBR2                                                                                                                                                                 |

|                                                           |    |          |                                                                                                                                                                                                                                                                     |
|-----------------------------------------------------------|----|----------|---------------------------------------------------------------------------------------------------------------------------------------------------------------------------------------------------------------------------------------------------------------------|
| regulation of muscle organ development                    | 6  | 0.000526 | GJA1, SMAD4, CCNB1, TGFB1, NOTCH1, TGFBR2                                                                                                                                                                                                                           |
| protein localization to organelle                         | 13 | 0.000528 | RALA, SMAD4, TGFB1, NOTCH1, TFRC, KDELR1, PSEN1, MID1, SREBF2, MID2, GJA1, TMSB4X, KDELR2                                                                                                                                                                           |
| positive regulation of macromolecule biosynthetic process | 20 | 0.00054  | MAP2K3, ACVRL1, SMAD4, TGFB1, NOTCH1, RNF14, HMGB2, TRIP4, HMGB1, PSEN1, THBS1, SREBF2, MID2, LARP1B, IRF2BPL, H1-2, WDR5, PLXNB2, TFAM, TCF4                                                                                                                       |
| BMP signaling pathway                                     | 6  | 0.000541 | ACVRL1, SMAD4, TGFB1, NOTCH1, CRIM1, HTRA1                                                                                                                                                                                                                          |
| cardiac muscle tissue development                         | 7  | 0.000546 | GJA1, SMAD4, CCNB1, TGFB1, NOTCH1, MYL3, TGFBR2                                                                                                                                                                                                                     |
| regulation of gene expression                             | 37 | 0.000556 | H2AX, ACVRL1, NOTCH1, TFRC, RNF14, HMGB2, HTRA1, HMGB1, PSEN1, THBS1, LARP1B, IRF2BPL, TIAL1, GJA1, ATXN2, SMCHD1, CCNB1, TMSB4X, WDR5, HMOX1, HMGB1P1, MAP2K3, SMAD4, TGFB1, ACE, FN1, CRIM1, TRIP4, CSNK1E, SREBF2, MID2, TGFBR2, H1-2, MMP14, PLXNB2, TFAM, TCF4 |
| regulation of cellular response to growth factor stimulus | 8  | 0.000578 | ACVRL1, SMAD4, TGFB1, NOTCH1, CRIM1, HTRA1, ITGA5, THBS1                                                                                                                                                                                                            |

|                                                         |    |          |                                                                                                                                                                                                 |
|---------------------------------------------------------|----|----------|-------------------------------------------------------------------------------------------------------------------------------------------------------------------------------------------------|
| positive regulation of cell communication               | 19 | 0.000587 | MAP2K3, ACVRL1, SMAD4, TGFB1, NOTCH1, TFRC, FN1, HMGB1, CSNK1E, PSEN1, THBS1, MID1, MID2, TGFBR2, TIAL1, GJA1, ADAM9, HMOX1, ITGA5                                                              |
| positive regulation of biosynthetic process             | 21 | 0.000587 | MAP2K3, ACVRL1, SMAD4, TGFB1, NOTCH1, RNF14, HMGB2, TRIP4, HMGB1, PSEN1, THBS1, SREBF2, MID2, LARP1B, IRF2BPL, H1-2, TMSB4X, WDR5, PLXNB2, TFAM, TCF4                                           |
| negative regulation of cellular metabolic process       | 27 | 0.000591 | H2AX, ACVRL1, NOTCH1, HMGB2, HMGB1, PSEN1, THBS1, IRF2BPL, TIAL1, DNAJB2, GJA1, ATXN2, SMCHD1, CCNB1, HINT2, HERC1, WDR5, HMOX1, SMAD4, TGFB1, CRIM1, SREBF2, MID2, H1-2, BACE2, SELENOS, ITM2B |
| amyloid precursor protein metabolic process             | 5  | 0.000609 | BACE2, ADAM9, CSNK1E, PSEN1, ITM2B                                                                                                                                                              |
| negative regulation of multicellular organismal process | 16 | 0.000613 | ACVRL1, SMAD4, TGFB1, ACE, NOTCH1, MMP2, CRIM1, FN1, HMGB1, PSEN1, THBS1, TGFBR2, GJA1, SELENOS, TMSB4X, HMOX1                                                                                  |
| tissue development                                      | 20 | 0.000639 | ACVRL1, RALA, SMAD4, TGFB1, NOTCH1, MMP2, FN1, ECE1, PSEN1, RHOB, TGFBR2, EFNB1, MMP14, GJA1, CCNB1, ERCC2, MYL3, PLXNB2, ADAM9, ITGA5                                                          |

|                                                   |    |          |                                                                                                                                                                    |
|---------------------------------------------------|----|----------|--------------------------------------------------------------------------------------------------------------------------------------------------------------------|
| negative regulation of binding                    | 6  | 0.00064  | DNAJB2, ACE, TMSB4X, HMOX1, CSNK1E, PSEN1                                                                                                                          |
| cell junction assembly                            | 7  | 0.000647 | ACVRL1, MMP14, GJA1, ACE, FN1, ITGA5, THBS1                                                                                                                        |
| catabolic process                                 | 23 | 0.000649 | SMAD4, TGFB1, ACE, NOTCH1, RNF14, MMP2, TRIP4, ECE1, HMGB1, CSNK1E, AGAP3, PSEN1, SREBF2, MID2, DNAJB2, MMP14, GJA1, HINT2, SELENOS, HERC1, ATP6V0A2, ADAM9, HMOX1 |
| regulation of growth                              | 11 | 0.000699 | DNAJB2, ACVRL1, MMP14, GJA1, SMAD4, CCNB1, TGFB1, NOTCH1, CRIM1, FN1, TGFBR2                                                                                       |
| cell adhesion                                     | 17 | 0.000713 | ACVRL1, TGFB1, NOTCH1, TFRC, MMP2, FN1, HMGB1, PSEN1, THBS1, RHOB, TGFBR2, EFNB1, MMP14, EMCN, PLXNB2, ADAM9, ITGA5                                                |
| negative regulation of endothelial cell migration | 5  | 0.000714 | ACVRL1, TGFB1, NOTCH1, HMGB1, THBS1                                                                                                                                |
| biological adhesion                               | 17 | 0.000748 | ACVRL1, TGFB1, NOTCH1, TFRC, MMP2, FN1, HMGB1, PSEN1, THBS1, RHOB, TGFBR2, EFNB1, MMP14, EMCN, PLXNB2, ADAM9, ITGA5                                                |
| response to BMP                                   | 6  | 0.000751 | ACVRL1, SMAD4, TGFB1, NOTCH1, CRIM1, HTRA1                                                                                                                         |
| cellular response to BMP stimulus                 | 6  | 0.000751 | ACVRL1, SMAD4, TGFB1, NOTCH1, CRIM1, HTRA1                                                                                                                         |

|                                                          |    |          |                                                                                                                                                                                                      |
|----------------------------------------------------------|----|----------|------------------------------------------------------------------------------------------------------------------------------------------------------------------------------------------------------|
| cell-substrate junction assembly                         | 5  | 0.000771 | ACVRL1, MMP14, FN1, ITGA5, THBS1                                                                                                                                                                     |
| positive regulation of intracellular signal transduction | 14 | 0.000782 | MAP2K3, TGFB1, NOTCH1, TFRC, FN1, HMGB1, PSEN1, THBS1, MID1, MID2, TIAL1, GJA1, ADAM9, HMOX1                                                                                                         |
| negative regulation of growth                            | 7  | 0.000807 | DNAJB2, ACVRL1, GJA1, SMAD4, TGFB1, NOTCH1, TGFBR2                                                                                                                                                   |
| positive regulation of cell death                        | 11 | 0.00082  | SMAD4, TGFB1, NOTCH1, ACE, MMP2, HTRA1, HMOX1, HMGB1, PSEN1, THBS1, RHOB                                                                                                                             |
| enzyme linked receptor protein signaling pathway         | 13 | 0.000851 | ACVRL1, SMAD4, TGFB1, NOTCH1, MMP2, CRIM1, HTRA1, PSEN1, THBS1, TGFBR2, EFN1, ADAM9, ITGA5                                                                                                           |
| response to oxidative stress                             | 9  | 0.00087  | MMP14, SELENOS, MMP2, ERCC2, ADAM9, HMOX1, AGAP3, PSEN1, RHOB                                                                                                                                        |
| heart morphogenesis                                      | 7  | 0.000873 | ACVRL1, SMAD4, TGFB1, NOTCH1, MYL3, PSEN1, TGFBR2                                                                                                                                                    |
| negative regulation of metabolic process                 | 28 | 0.000879 | H2AX, ACVRL1, NOTCH1, HMGB2, HMGB1, PSEN1, THBS1, IRF2BPL, TIAL1, DNAJB2, GJA1, ATXN2, SMCHD1, CCNB1, HINT2, HERC1, WDR5, HMOX1, SMAD4, TGFB1, ACE, CRIM1, SREBF2, MID2, H1-2, BACE2, SELENOS, ITM2B |

|                                          |    |          |                                                                                                                                                                                                     |
|------------------------------------------|----|----------|-----------------------------------------------------------------------------------------------------------------------------------------------------------------------------------------------------|
| negative regulation of cell migration    | 8  | 0.000913 | ACVRL1, GJA1, TGFB1, NOTCH1, HMOX1, HMGB1, THBS1, RHOB                                                                                                                                              |
| positive regulation of catabolic process | 9  | 0.000918 | DNAJB2, GJA1, RNF14, ADAM9, HMOX1, HMGB1, CSNK1E, PSEN1, MID2                                                                                                                                       |
| regulation of apoptotic process          | 17 | 0.000932 | SMAD4, TGFB1, ACE, NOTCH1, TFRC, MMP2, HMGB2, HTRA1, HMGB1, PSEN1, THBS1, RHOB, GJA1, SELENOS, HMOX1, ITGA5, TXNDC5                                                                                 |
| head development                         | 12 | 0.000936 | H2AX, MMP14, TGFB1, NOTCH1, ACE, TMX2, HERC1, MMP2, PLXNB2, CSNK1E, PSEN1, TGFBR2                                                                                                                   |
| cellular response to biotic stimulus     | 7  | 0.00096  | MAP2K3, TGFB1, NOTCH1, SELENOS, HMGB2, ADAM9, HMGB1                                                                                                                                                 |
| regulation of cell junction assembly     | 5  | 0.000995 | ACVRL1, MMP14, GJA1, ACE, THBS1                                                                                                                                                                     |
| sprouting angiogenesis                   | 6  | 0.001016 | ACVRL1, NOTCH1, HMOX1, HMGB1, ITGA5, THBS1                                                                                                                                                          |
| regulation of cell communication         | 28 | 0.00102  | ACVRL1, NOTCH1, TFRC, RNF14, HMGB2, HTRA1, HMGB1, PSEN1, THBS1, TIAL1, GJA1, TMSB4X, HMOX1, MAP2K3, SMAD4, TGFB1, ACE, FN1, CRIM1, CSNK1E, MID1, SREBF2, MID2, TGFBR2, MMP14, SELENOS, ADAM9, ITGA5 |



|                                                               |    |          |                                                                                                                                                                                                                                                                             |
|---------------------------------------------------------------|----|----------|-----------------------------------------------------------------------------------------------------------------------------------------------------------------------------------------------------------------------------------------------------------------------------|
| cellular response to transforming growth factor beta stimulus | 7  | 0.001035 | ACVRL1, SMAD4, TGFB1, HTRA1, ADAM9, THBS1, TGFB2                                                                                                                                                                                                                            |
| positive regulation of binding                                | 6  | 0.001041 | TGFB1, ACE, ERCC2, HMGB2, HMGB1, PSEN1                                                                                                                                                                                                                                      |
| cellular macromolecule biosynthetic process                   | 38 | 0.001065 | H2AX, ACVRL1, GTF3C1, NOTCH1, TFRC, RNF14, HMGB2, HTRA1, HMGB1, PSEN1, THBS1, LARP1B, IRF2BPL, TIAL1, GJA1, ATXN2, TMSB4X, WDR5, HMOX1, TK1, HMGB1P1, MAP2K3, SMAD4, TGFB1, RRM2, CRIM1, TRIP4, NOC3L, SREBF2, MID2, H1-2, BACE2, SELENOS, ERCC2, PLXNB2, TFAM, TCF4, ITM2B |
| positive regulation of proteolysis                            | 8  | 0.001065 | DNAJB2, MMP14, RNF14, FN1, ADAM9, HMGB1, CSNK1E, PSEN1                                                                                                                                                                                                                      |
| regulation of cellular catabolic process                      | 11 | 0.001094 | DNAJB2, HERC1, RNF14, ATP6V0A2, ADAM9, HMOX1, HMGB1, CSNK1E, PSEN1, SREBF2, MID2                                                                                                                                                                                            |
| regulation of programmed cell death                           | 17 | 0.001103 | SMAD4, TGFB1, ACE, NOTCH1, TFRC, MMP2, HMGB2, HTRA1, HMGB1, PSEN1, THBS1, RHOB, GJA1, SELENOS, HMOX1, ITGA5, TXNDC5                                                                                                                                                         |
| regulation of BMP signaling pathway                           | 5  | 0.001104 | ACVRL1, SMAD4, NOTCH1, CRIM1, HTRA1                                                                                                                                                                                                                                         |
| regulation of endothelial cell proliferation                  | 6  | 0.001119 | ACVRL1, GJA1, HMGB2, HMOX1, HMGB1, THBS1                                                                                                                                                                                                                                    |

|                                                  |    |          |                                                                                                                               |
|--------------------------------------------------|----|----------|-------------------------------------------------------------------------------------------------------------------------------|
| negative regulation of cell motility             | 8  | 0.001148 | ACVRL1, GJA1, TGFB1, NOTCH1, HMOX1, HMGB1, THBS1, RHOB                                                                        |
| response to transforming growth factor beta      | 7  | 0.001156 | ACVRL1, SMAD4, TGFB1, HTRA1, ADAM9, THBS1, TGFBR2                                                                             |
| response to hormone                              | 12 | 0.001198 | GJA1, TGFB1, NOTCH1, ACE, SELENOS, RNF14, HMGB2, ADAM9, TRIP4, HMGB1, THBS1, TGFBR2                                           |
| cell activation                                  | 14 | 0.001206 | SMAD4, TGFB1, TFRC, KDELRL1, FN1, HMGB1, PSEN1, THBS1, TGFBR2, BACE2, EFN1, MMP14, ADAM9, HMOX1                               |
| positive regulation of RNA metabolic process     | 18 | 0.001218 | MAP2K3, ACVRL1, SMAD4, TGFB1, NOTCH1, RNF14, HMGB2, TRIP4, HMGB1, PSEN1, SREBF2, MID2, IRF2BPL, H1-2, CCNB1, WDR5, TFAM, TCF4 |
| regulation of phosphorylation                    | 17 | 0.001261 | MAP2K3, ACVRL1, SMAD4, TGFB1, ACE, NOTCH1, TFRC, FN1, HMGB1, PSEN1, THBS1, MID1, TGFBR2, CCNB1, PLXNB2, ADAM9, ITGA5          |
| negative regulation of epithelial cell migration | 5  | 0.001262 | ACVRL1, TGFB1, NOTCH1, HMGB1, THBS1                                                                                           |
| smooth muscle cell proliferation                 | 6  | 0.001286 | GJA1, TGFB1, MMP2, HMOX1, THBS1, TGFBR2                                                                                       |

|                                        |    |          |                                                                                                                                                                                                                                                                                                                                        |
|----------------------------------------|----|----------|----------------------------------------------------------------------------------------------------------------------------------------------------------------------------------------------------------------------------------------------------------------------------------------------------------------------------------------|
| organic substance biosynthetic process | 43 | 0.001302 | H2AX, ACVRL1, GTF3C1, NOTCH1, TFRC, RNF14, HMGB2, HTRA1, HMGB1, PSEN1, THBS1, LARP1B, IRF2BPL, TIAL1, CYB5R1, GJA1, ATXN2, HINT2, TMSB4X, WDR5, HMOX1, ATP5MJ, TK1, HMGB1P1, MAP2K3, SMAD4, TGFB1, RRM2, OSBPL3, CRIM1, TRIP4, NOC3L, SREBF2, MID2, H1-2, BACE2, SELENOS, ERCC2, PLXNB2, TFAM, TCF4, SERINC1, ITM2B                    |
| multicellular organismal process       | 48 | 0.001336 | H2AX, ACVRL1, RALA, NOTCH1, TFRC, KDELR1, HMGB2, HTRA1, ECE1, HMGB1, PSEN1, THBS1, IRF2BPL, TIAL1, EFN1, GJA1, SMCHD1, CCNB1, HERC1, TMSB4X, POTEJ, WDR5, HMOX1, MAP2K3, SMAD4, TGFB1, RRM2, ACE, MMP2, FN1, CRIM1, CSNK1E, MID1, RHOB, TGFB2, BACE2, MMP14, EMCN, TMX2, SELENOS, MYL1, ERCC2, MYL3, PLXNB2, ADAM9, TCF4, ITGA5, ITM2B |
| macromolecule biosynthetic process     | 38 | 0.001344 | H2AX, ACVRL1, GTF3C1, NOTCH1, TFRC, RNF14, HMGB2, HTRA1, HMGB1, PSEN1, THBS1, LARP1B, IRF2BPL, TIAL1, GJA1, ATXN2, TMSB4X, WDR5, HMOX1, TK1, HMGB1P1, MAP2K3, SMAD4, TGFB1, RRM2, CRIM1, TRIP4, NOC3L, SREBF2, MID2, H1-2, BACE2, SELENOS, ERCC2, PLXNB2, TFAM, TCF4, ITM2B                                                            |
| lung development                       | 6  | 0.001376 | MMP14, TGFB1, NOTCH1, ACE, HMGB1, TGFB2                                                                                                                                                                                                                                                                                                |

|                                                 |    |          |                                                                                                                                               |
|-------------------------------------------------|----|----------|-----------------------------------------------------------------------------------------------------------------------------------------------|
| cellular response to oxygen-containing compound | 14 | 0.001391 | MAP2K3, SMAD4, TGFB1, ACE, MMP2, HMGB2, HMGB1, AGAP3, PSEN1, RHOB, GJA1, CCNB1, SELENOS, ADAM9                                                |
| regulation of smooth muscle cell proliferation  | 6  | 0.001407 | GJA1, TGFB1, MMP2, HMOX1, THBS1, TGFBR2                                                                                                       |
| regulation of phosphate metabolic process       | 18 | 0.001421 | MAP2K3, ACVRL1, SMAD4, TGFB1, ACE, NOTCH1, TFRC, FN1, HMGB1, PSEN1, THBS1, MID1, TGFBR2, CCNB1, TMSB4X, PLXNB2, ADAM9, ITGA5                  |
| protein processing                              | 7  | 0.001454 | BACE2, MMP14, ACE, ADAM9, ECE1, PSEN1, THBS1                                                                                                  |
| regulation of phosphorus metabolic process      | 18 | 0.001463 | MAP2K3, ACVRL1, SMAD4, TGFB1, ACE, NOTCH1, TFRC, FN1, HMGB1, PSEN1, THBS1, MID1, TGFBR2, CCNB1, TMSB4X, PLXNB2, ADAM9, ITGA5                  |
| regulation of angiogenesis                      | 8  | 0.001469 | ACVRL1, NOTCH1, HMOX1, HMGB1, ITGA5, THBS1, RHOB, TGFBR2                                                                                      |
| homeostasis of number of cells                  | 7  | 0.001479 | TGFB1, NOTCH1, EMCN, ERCC2, HMGB2, HMOX1, HMGB1                                                                                               |
| respiratory tube development                    | 6  | 0.001504 | MMP14, TGFB1, NOTCH1, ACE, HMGB1, TGFBR2                                                                                                      |
| protein metabolic process                       | 41 | 0.001506 | ACVRL1, NOTCH1, TFRC, RNF14, HTRA1, ECE1, HMGB1, PSEN1, AGAP3, THBS1, LARP1B, IRF2BPL, TIAL1, DNAJB2, GJA1, ATXN2, CCNB1, HINT2, HERC1, WDR5, |

|                                                        |    |          |                                                                                                                                                                                                                                                                                                        |
|--------------------------------------------------------|----|----------|--------------------------------------------------------------------------------------------------------------------------------------------------------------------------------------------------------------------------------------------------------------------------------------------------------|
|                                                        |    |          | MAP2K3, SMAD4, TGFB1, ACE, MMP2, FN1, CRIM1, TRIP4, CSNK1E, MID1, MID2, TGFBR2, DDB2, H1-2, BACE2, MMP14, SELENOS, PLXNB2, ADAM9, ITGA5, ITM2B                                                                                                                                                         |
| positive regulation of cellular catabolic process      | 8  | 0.001511 | DNAJB2, RNF14, ADAM9, HMOX1, HMGB1, CSNK1E, PSEN1, MID2                                                                                                                                                                                                                                                |
| mesenchyme development                                 | 7  | 0.00153  | ACVRL1, EFNB1, SMAD4, TGFB1, NOTCH1, FN1, TGFBR2                                                                                                                                                                                                                                                       |
| nucleobase-containing compound biosynthetic process    | 31 | 0.001628 | H2AX, ACVRL1, GTF3C1, NOTCH1, TFRC, RNF14, HMGB2, HTRA1, HMGB1, PSEN1, IRF2BPL, TIAL1, GJA1, TMSB4X, WDR5, HMOX1, ATP5MJ, TK1, HMGB1P1, MAP2K3, SMAD4, TGFB1, RRM2, CRIM1, TRIP4, SREBF2, MID2, H1-2, ERCC2, TFAM, TCF4                                                                                |
| cellular component organization or biogenesis          | 44 | 0.001642 | H2AX, ACVRL1, RALA, NOTCH1, TFRC, HMGB2, ECE1, HMGB1, PSEN1, THBS1, DNAJB2, EFNB1, GJA1, ATXN2, SMCHD1, CCNB1, HERC1, TMSB4X, WDR5, TK1, HMGN2, SMAD4, TGFB1, RRM2, ACE, MMP2, FN1, CRIM1, TRIP4, MID1, SREBF2, RHOB, TTC17, DDB2, H1-2, MMP14, ERCC2, PLXNB2, TFAM, ADAM9, PREB, TCF4, SERINC1, ITGA5 |
| negative regulation of macromolecule metabolic process | 26 | 0.001705 | H2AX, ACVRL1, NOTCH1, HMGB2, HMGB1, PSEN1, THBS1, IRF2BPL, TIAL1, DNAJB2, GJA1, ATXN2, SMCHD1,                                                                                                                                                                                                         |

|                                                           |    |          |                                                                                                                                                                                                                                                                                              |
|-----------------------------------------------------------|----|----------|----------------------------------------------------------------------------------------------------------------------------------------------------------------------------------------------------------------------------------------------------------------------------------------------|
|                                                           |    |          | CCNB1, HINT2, WDR5, SMAD4, TGFB1, ACE, CRIM1, SREBF2, MID2, H1-2, BACE2, SELENOS, ITM2B                                                                                                                                                                                                      |
| cellular component organization                           | 43 | 0.001835 | H2AX, ACVRL1, RALA, NOTCH1, TFRC, HMGB2, ECE1, HMGB1, PSEN1, THBS1, DNAJB2, EFN1, GJA1, ATXN2, SMCHD1, CCNB1, HERC1, TMSB4X, WDR5, TK1, HMGN2, SMAD4, TGFB1, RRM2, ACE, MMP2, FN1, CRIM1, TRIP4, MID1, SREBF2, RHOB, TTC17, DDB2, H1-2, MMP14, ERCC2, PLXNB2, TFAM, ADAM9, PREB, TCF4, ITGA5 |
| regulation of cellular macromolecule biosynthetic process | 33 | 0.00186  | H2AX, ACVRL1, NOTCH1, TFRC, RNF14, HMGB2, HTRA1, HMGB1, PSEN1, THBS1, LARP1B, IRF2BPL, TIAL1, GJA1, ATXN2, TMSB4X, WDR5, HMOX1, HMGB1P1, MAP2K3, SMAD4, TGFB1, CRIM1, TRIP4, SREBF2, MID2, H1-2, BACE2, SELENOS, PLXNB2, TFAM, TCF4, ITM2B                                                   |
| negative regulation of cellular component movement        | 8  | 0.00188  | ACVRL1, GJA1, TGFB1, NOTCH1, HMOX1, HMGB1, THBS1, RHOB                                                                                                                                                                                                                                       |
| biosynthetic process                                      | 43 | 0.001882 | H2AX, ACVRL1, GTF3C1, NOTCH1, TFRC, RNF14, HMGB2, HTRA1, HMGB1, PSEN1, THBS1, LARP1B, IRF2BPL, TIAL1, CYB5R1, GJA1, ATXN2, HINT2, TMSB4X, WDR5, HMOX1, ATP5MJ, TK1, HMGB1P1, MAP2K3, SMAD4, TGFB1, RRM2, OSBPL3, CRIM1, TRIP4, NOC3L, SREBF2, MID2, H1-2,                                    |

|                                                             |    |          |                                                                                                                                                                                                                                                            |
|-------------------------------------------------------------|----|----------|------------------------------------------------------------------------------------------------------------------------------------------------------------------------------------------------------------------------------------------------------------|
|                                                             |    |          | BACE2, SELENOS, ERCC2, PLXNB2, TFAM, TCF4, SERINC1, ITM2B                                                                                                                                                                                                  |
| cardiac chamber morphogenesis                               | 5  | 0.001938 | SMAD4, TGFB1, NOTCH1, MYL3, TGFBR2                                                                                                                                                                                                                         |
| female pregnancy                                            | 6  | 0.001939 | GJA1, TGFB1, ACE, MMP2, ITGA5, TGFBR2                                                                                                                                                                                                                      |
| regulation of nitrogen compound metabolic process           | 35 | 0.001994 | H2AX, ACVRL1, NOTCH1, TFRC, RNF14, HMGB2, HTRA1, HMGB1, PSEN1, THBS1, LARP1B, IRF2BPL, TIAL1, GJA1, ATXN2, SMCHD1, CCNB1, TMSB4X, WDR5, HMOX1, HMGB1P1, MAP2K3, SMAD4, TGFB1, CRIM1, TRIP4, CSNK1E, SREBF2, MID2, H1-2, SELENOS, ERCC2, PLXNB2, TFAM, TCF4 |
| single-organism metabolic process                           | 30 | 0.002006 | NOTCH1, RETSAT, TFRC, HMGB1, PSEN1, THBS1, DNAJB2, CYB5R1, ATXN2, CCNB1, HINT2, TMSB4X, DGLUCY, WDR5, HMOX1, ATP5MJ, TK1, MAP2K3, SMAD4, TGFB1, RRM2, MMP2, OSBPL3, FN1, MID1, SREBF2, MMP14, SELENOS, ADAM9, SERINC1                                      |
| positive regulation of nucleic acid-templated transcription | 17 | 0.002024 | MAP2K3, ACVRL1, SMAD4, TGFB1, NOTCH1, RNF14, HMGB2, TRIP4, HMGB1, PSEN1, SREBF2, MID2, IRF2BPL, H1-2, WDR5, TFAM, TCF4                                                                                                                                     |

|                                                     |    |          |                                                                                                                                                                                                                           |
|-----------------------------------------------------|----|----------|---------------------------------------------------------------------------------------------------------------------------------------------------------------------------------------------------------------------------|
| positive regulation of transcription, DNA-templated | 17 | 0.002024 | MAP2K3, ACVRL1, SMAD4, TGFB1, NOTCH1, RNF14, HMGB2, TRIP4, HMGB1, PSEN1, SREBF2, MID2, IRF2BPL, H1-2, WDR5, TFAM, TCF4                                                                                                    |
| formation of primary germ layer                     | 5  | 0.002052 | MMP14, GJA1, MMP2, FN1, ITGA5                                                                                                                                                                                             |
| cardiac ventricle development                       | 5  | 0.002052 | SMAD4, TGFB1, NOTCH1, MYL3, TGFBR2                                                                                                                                                                                        |
| positive regulation of RNA biosynthetic process     | 17 | 0.002133 | MAP2K3, ACVRL1, SMAD4, TGFB1, NOTCH1, RNF14, HMGB2, TRIP4, HMGB1, PSEN1, SREBF2, MID2, IRF2BPL, H1-2, WDR5, TFAM, TCF4                                                                                                    |
| growth                                              | 12 | 0.002154 | DNAJB2, ACVRL1, MMP14, GJA1, SMAD4, CCNB1, TGFB1, NOTCH1, ERCC2, CRIM1, FN1, TGFBR2                                                                                                                                       |
| macromolecular complex subunit organization         | 19 | 0.002158 | H2AX, SMAD4, TGFB1, RRM2, TFRC, HMGB2, FN1, TRIP4, HMGB1, MID1, TTC17, H1-2, ATXN2, CCNB1, TMSB4X, TFAM, PREB, TCF4, TK1                                                                                                  |
| regulation of response to stimulus                  | 31 | 0.002161 | H2AX, ACVRL1, NOTCH1, TFRC, RNF14, HMGB2, HTRA1, MOSPD2, HMGB1, PSEN1, THBS1, TIAL1, GJA1, SMCHD1, TMSB4X, HMOX1, MAP2K3, SMAD4, TGFB1, ACE, FN1, CRIM1, CSNK1E, MID1, SREBF2, MID2, TGFBR2, MMP14, SELENOS, ADAM9, ITGA5 |



|                                                  |    |          |                                                                                                                                                                                                                                            |
|--------------------------------------------------|----|----------|--------------------------------------------------------------------------------------------------------------------------------------------------------------------------------------------------------------------------------------------|
| neuron projection development                    | 12 | 0.002171 | EFNB1, GJA1, SMAD4, NOTCH1, HERC1, MMP2, WDR5, FN1, PLXNB2, ECE1, HMGB1, PSEN1                                                                                                                                                             |
| regulation of macromolecule biosynthetic process | 33 | 0.002171 | H2AX, ACVRL1, NOTCH1, TFRC, RNF14, HMGB2, HTRA1, HMGB1, PSEN1, THBS1, LARP1B, IRF2BPL, TIAL1, GJA1, ATXN2, TMSB4X, WDR5, HMOX1, HMGB1P1, MAP2K3, SMAD4, TGFB1, CRIM1, TRIP4, SREBF2, MID2, H1-2, BACE2, SELENOS, PLXNB2, TFAM, TCF4, ITM2B |
| heterocycle biosynthetic process                 | 31 | 0.002202 | H2AX, ACVRL1, GTF3C1, NOTCH1, TFRC, RNF14, HMGB2, HTRA1, HMGB1, PSEN1, IRF2BPL, TIAL1, GJA1, TMSB4X, WDR5, HMOX1, ATP5MJ, TK1, HMGB1P1, MAP2K3, SMAD4, TGFB1, RRM2, CRIM1, TRIP4, SREBF2, MID2, H1-2, ERCC2, TFAM, TCF4                    |
| neuron differentiation                           | 15 | 0.002227 | SMAD4, NOTCH1, MMP2, FN1, ECE1, HMGB1, CSNK1E, PSEN1, EFNB1, GJA1, HERC1, ERCC2, WDR5, PLXNB2, TCF4                                                                                                                                        |
| aromatic compound biosynthetic process           | 31 | 0.002251 | H2AX, ACVRL1, GTF3C1, NOTCH1, TFRC, RNF14, HMGB2, HTRA1, HMGB1, PSEN1, IRF2BPL, TIAL1, GJA1, TMSB4X, WDR5, HMOX1, ATP5MJ, TK1, HMGB1P1, MAP2K3, SMAD4, TGFB1, RRM2, CRIM1, TRIP4, SREBF2, MID2, H1-2, ERCC2, TFAM, TCF4                    |

|                                               |    |          |                                                                                                                                 |
|-----------------------------------------------|----|----------|---------------------------------------------------------------------------------------------------------------------------------|
| hematopoietic progenitor cell differentiation | 5  | 0.002421 | TGFB1, NOTCH1, ACE, ERCC2, PSEN1                                                                                                |
| regulation of DNA recombination               | 5  | 0.002421 | SMCHD1, TGFB1, TFRC, ERCC2, H1-2                                                                                                |
| maintenance of location                       | 7  | 0.002473 | GJA1, TGFB1, KDEL1, TMSB4X, KDEL2, PSEN1, SREBF2                                                                                |
| vesicle-mediated transport                    | 16 | 0.002507 | RALA, TGFB1, NOTCH1, TFRC, KDEL1, HMGB1, CSNK1E, PSEN1, THBS1, TGFBR2, ATXN2, FCGRT, HMOX1, PREB, KDEL2, TXNDC5                 |
| DNA conformation change                       | 7  | 0.002549 | H2AX, SMCHD1, CCNB1, ERCC2, HMGB2, HMGB1, H1-2                                                                                  |
| regulation of cell growth                     | 8  | 0.002563 | DNAJB2, ACVRL1, MMP14, GJA1, SMAD4, TGFB1, CRIM1, FN1                                                                           |
| regulation of vasculature development         | 8  | 0.002563 | ACVRL1, NOTCH1, HMOX1, HMGB1, ITGA5, THBS1, RHOB, TGFBR2                                                                        |
| regulation of sprouting angiogenesis          | 5  | 0.002621 | NOTCH1, HMOX1, HMGB1, ITGA5, THBS1                                                                                              |
| homeostatic process                           | 18 | 0.002676 | SMAD4, TGFB1, ACE, NOTCH1, TFRC, HMGB2, HMGB1, PSEN1, SREBF2, DNAJB2, BACE2, GJA1, EMCN, SELENOS, POTEJ, ERCC2, ATP6V0A2, HMOX1 |

|                                          |    |          |                                                                                                                                                                                                                                                                                                                                                                                               |
|------------------------------------------|----|----------|-----------------------------------------------------------------------------------------------------------------------------------------------------------------------------------------------------------------------------------------------------------------------------------------------------------------------------------------------------------------------------------------------|
| cell growth                              | 8  | 0.002694 | DNAJB2, ACVRL1, MMP14, GJA1, SMAD4, TGFB1, FN1, TGFB2                                                                                                                                                                                                                                                                                                                                         |
| DNA packaging                            | 6  | 0.002705 | H2AX, SMCHD1, CCNB1, HMGB2, HMGB1, H1-2                                                                                                                                                                                                                                                                                                                                                       |
| cellular macromolecule metabolic process | 55 | 0.002735 | H2AX, ACVRL1, TFRC, RNF14, HMGB2, ECE1, HMGB1, LARP1B, IRF2BPL, TIAL1, GJA1, SMCHD1, HINT2, HERC1, TMSB4X, WDR5, TK1, HMGB1P1, MAP2K3, MMP2, CSNK1E, MID1, MID2, SREBF2, TGFB2, DDB2, BACE2, MMP14, SELENOS, ADAM9, TFAM, ITGA5, GTF3C1, NOTCH1, HTRA1, PSEN1, AGAP3, THBS1, DNAJB2, ATXN2, CCNB1, HMOX1, SMAD4, TGFB1, RRM2, ACE, FN1, CRIM1, TRIP4, NOC3L, H1-2, ERCC2, PLXNB2, TCF4, ITM2B |
| cellular response to lipopolysaccharide  | 6  | 0.002808 | MAP2K3, TGFB1, SELENOS, HMGB2, ADAM9, HMGB1                                                                                                                                                                                                                                                                                                                                                   |
| regulation of cell-substrate adhesion    | 6  | 0.002808 | ACVRL1, MMP14, NOTCH1, FN1, ITGA5, THBS1                                                                                                                                                                                                                                                                                                                                                      |
| cell-cell adhesion                       | 12 | 0.002857 | EFNB1, TGFB1, NOTCH1, EMCN, TFRC, FN1, ADAM9, PLXNB2, HMGB1, ITGA5, PSEN1, TGFB2                                                                                                                                                                                                                                                                                                              |
| macromolecule localization               | 24 | 0.00287  | RALA, SMAD4, TGFB1, ACE, NOTCH1, TFRC, KDEL1, OSBPL3, CSNK1E, PSEN1, THBS1, MID1, SREBF2, MID2,                                                                                                                                                                                                                                                                                               |

|                                     |    |          |                                                                                                                                                                                                |
|-------------------------------------|----|----------|------------------------------------------------------------------------------------------------------------------------------------------------------------------------------------------------|
|                                     |    |          | RHOB, TGFB2, MMP14, ATXN2, GJA1, SELENOS, TMSB4X, ADAM9, PREB, KDELR2                                                                                                                          |
| endothelium development             | 5  | 0.002906 | ACVRL1, GJA1, SMAD4, NOTCH1, RHOB                                                                                                                                                              |
| regulation of cytokine production   | 11 | 0.00291  | MAP2K3, SMAD4, TGFB1, SELENOS, TMSB4X, HMGB2, FN1, HMOX1, HMGB1, PSEN1, THBS1                                                                                                                  |
| transcription, DNA-templated        | 27 | 0.002912 | H2AX, ACVRL1, GTF3C1, NOTCH1, TFRC, RNF14, HMGB2, HTRA1, HMGB1, PSEN1, IRF2BPL, TIAL1, TMSB4X, WDR5, HMOX1, HMGB1P1, MAP2K3, SMAD4, TGFB1, CRIM1, TRIP4, SREBF2, MID2, H1-2, ERCC2, TFAM, TCF4 |
| macromolecule catabolic process     | 14 | 0.002937 | SMAD4, TGFB1, NOTCH1, RNF14, MMP2, TRIP4, HMGB1, CSNK1E, AGAP3, PSEN1, DNAJB2, GJA1, SELENOS, ADAM9                                                                                            |
| regulation of cell death            | 17 | 0.002961 | SMAD4, TGFB1, ACE, NOTCH1, TFRC, MMP2, HMGB2, HTRA1, HMGB1, PSEN1, THBS1, RHOB, GJA1, SELENOS, HMOX1, ITGA5, TXNDC5                                                                            |
| mesenchymal cell differentiation    | 6  | 0.002967 | EFNB1, SMAD4, TGFB1, NOTCH1, FN1, TGFB2                                                                                                                                                        |
| regulation of DNA metabolic process | 9  | 0.003033 | H2AX, ACVRL1, SMCHD1, GJA1, TGFB1, TFRC, ERCC2, HMGB1, H1-2                                                                                                                                    |

|                                      |    |          |                                                                                                                                                     |
|--------------------------------------|----|----------|-----------------------------------------------------------------------------------------------------------------------------------------------------|
| protein maturation                   | 7  | 0.003173 | BACE2, MMP14, ACE, ADAM9, ECE1, PSEN1, THBS1                                                                                                        |
| regulation of leukocyte migration    | 6  | 0.003189 | MMP14, TGFB1, MOSPD2, HMOX1, HMGB1, THBS1                                                                                                           |
| regulation of catalytic activity     | 21 | 0.003218 | MAP2K3, TGFB1, ACE, NOTCH1, CRIM1, HMGB2, FN1, HMGB1, AGAP3, PSEN1, THBS1, TGFBR2, DNAJB2, CCNB1, HERC1, TMSB4X, MYL3, PLXNB2, ADAM9, PREB, SERINC1 |
| cell-matrix adhesion                 | 6  | 0.003247 | ACVRL1, MMP14, FN1, ADAM9, ITGA5, THBS1                                                                                                             |
| reproductive structure development   | 8  | 0.003344 | MMP14, GJA1, SMAD4, NOTCH1, ACE, MMP2, HTRA1, HMGB2                                                                                                 |
| regulation of chemotaxis             | 6  | 0.003364 | TGFB1, NOTCH1, TMSB4X, MOSPD2, HMGB1, THBS1                                                                                                         |
| stem cell differentiation            | 6  | 0.003364 | EFNB1, SMAD4, NOTCH1, ACE, ERCC2, FN1                                                                                                               |
| response to unfolded protein         | 5  | 0.003371 | DNAJB2, SELENOS, DNAJB4, THBS1, HSPA13                                                                                                              |
| multi-multicellular organism process | 6  | 0.003423 | GJA1, TGFB1, ACE, MMP2, ITGA5, TGFBR2                                                                                                               |
| reproductive system development      | 8  | 0.003504 | MMP14, GJA1, SMAD4, NOTCH1, ACE, MMP2, HTRA1, HMGB2                                                                                                 |
| protein catabolic process            | 12 | 0.003525 | DNAJB2, GJA1, SMAD4, NOTCH1, SELENOS, RNF14, MMP2, ADAM9, TRIP4, AGAP3, CSNK1E, PSEN1                                                               |

|                                                   |    |          |                                                                                                                                                                                                                                            |
|---------------------------------------------------|----|----------|--------------------------------------------------------------------------------------------------------------------------------------------------------------------------------------------------------------------------------------------|
| positive regulation of chemotaxis                 | 5  | 0.003537 | TGFB1, TMSB4X, MOSPD2, HMGB1, THBS1                                                                                                                                                                                                        |
| cellular response to molecule of bacterial origin | 6  | 0.003545 | MAP2K3, TGFB1, SELENOS, HMGB2, ADAM9, HMGB1                                                                                                                                                                                                |
| macromolecular complex assembly                   | 17 | 0.003658 | H2AX, SMAD4, TGFB1, RRM2, TFRC, HMGB2, FN1, HMGB1, TTC17, H1-2, ATXN2, CCNB1, TMSB4X, TFAM, PREB, TCF4, TK1                                                                                                                                |
| positive regulation of protein catabolic process  | 6  | 0.003798 | DNAJB2, GJA1, RNF14, ADAM9, CSNK1E, PSEN1                                                                                                                                                                                                  |
| chromatin organization                            | 11 | 0.004084 | H2AX, SMCHD1, SMAD4, CCNB1, TGFB1, WDR5, HMGB2, HMGB1, HMGN2, DDB2, H1-2                                                                                                                                                                   |
| regulation of cellular biosynthetic process       | 33 | 0.004288 | H2AX, ACVRL1, NOTCH1, TFRC, RNF14, HMGB2, HTRA1, HMGB1, PSEN1, THBS1, LARP1B, IRF2BPL, TIAL1, GJA1, ATXN2, TMSB4X, WDR5, HMOX1, HMGB1P1, MAP2K3, SMAD4, TGFB1, CRIM1, TRIP4, SREBF2, MID2, H1-2, BACE2, SELENOS, PLXNB2, TFAM, TCF4, ITM2B |
| branching morphogenesis of an epithelial tube     | 5  | 0.004352 | MMP14, SMAD4, TGFB1, NOTCH1, TGFB2                                                                                                                                                                                                         |
| positive regulation of leukocyte migration        | 5  | 0.004352 | MMP14, TGFB1, MOSPD2, HMGB1, THBS1                                                                                                                                                                                                         |

|                               |    |          |                                                                                                                                                                                                                                                                                                                                                                                                                                                                                                                             |
|-------------------------------|----|----------|-----------------------------------------------------------------------------------------------------------------------------------------------------------------------------------------------------------------------------------------------------------------------------------------------------------------------------------------------------------------------------------------------------------------------------------------------------------------------------------------------------------------------------|
| regulation of MAPK cascade    | 10 | 0.004391 | MAP2K3, SMAD4, TGFB1, NOTCH1, FN1, ADAM9, HMGB1, PSEN1, THBS1, MID1                                                                                                                                                                                                                                                                                                                                                                                                                                                         |
| single-organism process       | 72 | 0.0044   | H2AX, ACVRL1, TFRC, RNF14, KDELRL1, HMGB2, ECE1, HMGB1, IRF2BPL, TIAL1, GJA1, SMCHD1, HINT2, HERC1, FCGRT, TMSB4X, POTEJ, WDR5, TK1, MAP2K3, MMP2, CSNK1E, MID1, MID2, SREBF2, RHOB, TGFBR2, BACE2, MMP14, EMCN, TMX2, SELENOS, MYL1, MYL3, ADAM9, PREB, KDELRL2, ITGA5, RALA, NOTCH1, RETSAT, HTRA1, MOSPD2, PSEN1, AGAP3, THBS1, DNAJB2, EFN1, CYB5R1, ATXN2, CCNB1, DGLUCY, ATP6V0A2, HMOX1, ATP5MJ, TXNDC5, SMAD4, TGFB1, RRM2, ACE, OSBPL3, FN1, CRIM1, TRIP4, NOC3L, H1-2, TTC17, ERCC2, PLXNB2, TCF4, SERINC1, ITM2B |
| cellular biosynthetic process | 41 | 0.004421 | H2AX, ACVRL1, GTF3C1, NOTCH1, TFRC, RNF14, HMGB2, HTRA1, HMGB1, PSEN1, THBS1, LARP1B, IRF2BPL, TIAL1, GJA1, ATXN2, TMSB4X, WDR5, HMOX1, ATP5MJ, TK1, HMGB1P1, MAP2K3, SMAD4, TGFB1, RRM2, OSBPL3, CRIM1, TRIP4, NOC3L, SREBF2, MID2, H1-2, BACE2, SELENOS, ERCC2, PLXNB2, TFAM, TCF4, SERINC1, ITM2B                                                                                                                                                                                                                        |

|                                            |    |          |                                                                                                                                                                                                                                                                                                |
|--------------------------------------------|----|----------|------------------------------------------------------------------------------------------------------------------------------------------------------------------------------------------------------------------------------------------------------------------------------------------------|
| gene expression                            | 41 | 0.004434 | H2AX, ACVRL1, GTF3C1, NOTCH1, TFRC, RNF14, HMGB2, HTRA1, ECE1, HMGB1, PSEN1, THBS1, LARP1B, IRF2BPL, TIAL1, GJA1, ATXN2, SMCHD1, CCNB1, TMSB4X, WDR5, HMOX1, HMGB1P1, MAP2K3, SMAD4, TGFB1, ACE, FN1, CRIM1, TRIP4, CSNK1E, SREBF2, MID2, H1-2, BACE2, MMP14, ERCC2, PLXNB2, TFAM, ADAM9, TCF4 |
| positive regulation of cell adhesion       | 8  | 0.004538 | EFNB1, TGFB1, TFRC, FN1, ADAM9, HMGB1, ITGA5, TGFBR2                                                                                                                                                                                                                                           |
| negative regulation of cytokine production | 7  | 0.004575 | TGFB1, SELENOS, TMSB4X, FN1, HMOX1, HMGB1, THBS1                                                                                                                                                                                                                                               |
| gamete generation                          | 10 | 0.004658 | TIAL1, H2AX, GJA1, SMAD4, CCNB1, TGFB1, NOTCH1, ACE, MMP2, HMGB2                                                                                                                                                                                                                               |
| multi-organism process                     | 21 | 0.004802 | H2AX, MAP2K3, SMAD4, TGFB1, ACE, NOTCH1, TFRC, MMP2, HMGB2, HTRA1, FN1, HMGB1, MID2, TGFBR2, TIAL1, GJA1, CCNB1, SELENOS, ADAM9, ITGA5, HMGN2                                                                                                                                                  |
| single-organism localization               | 24 | 0.004815 | RALA, SMAD4, TGFB1, ACE, NOTCH1, TFRC, KDELR1, OSBPL3, HMGB1, PSEN1, THBS1, SREBF2, ATXN2, GJA1, SELENOS, FCGRT, TMSB4X, ATP6V0A2, ADAM9, HMOX1, PREB, KDELR2, ATP5MJ, TXNDC5                                                                                                                  |



|                                                |    |          |                                                                                                                                                                                                                                            |
|------------------------------------------------|----|----------|--------------------------------------------------------------------------------------------------------------------------------------------------------------------------------------------------------------------------------------------|
| hemopoiesis                                    | 11 | 0.004907 | MMP14, TGFB1, NOTCH1, ACE, TFRC, KDELR1, ERCC2, HMGB2, HMGB1, PSEN1, TGFBR2                                                                                                                                                                |
| regulation of proteolysis                      | 10 | 0.004938 | DNAJB2, MMP14, RNF14, CRIM1, FN1, ADAM9, HMGB1, CSNK1E, PSEN1, THBS1                                                                                                                                                                       |
| cell-substrate adhesion                        | 7  | 0.00494  | ACVRL1, MMP14, NOTCH1, FN1, ADAM9, ITGA5, THBS1                                                                                                                                                                                            |
| axon development                               | 8  | 0.004947 | EFNB1, SMAD4, NOTCH1, MMP2, FN1, PLXNB2, ECE1, PSEN1                                                                                                                                                                                       |
| receptor metabolic process                     | 5  | 0.005067 | ATXN2, TGFB1, TFRC, ECE1, PSEN1                                                                                                                                                                                                            |
| positive regulation of protein kinase activity | 8  | 0.005217 | MAP2K3, CCNB1, TGFB1, ACE, ADAM9, PSEN1, THBS1, TGFBR2                                                                                                                                                                                     |
| regulation of biosynthetic process             | 33 | 0.005272 | H2AX, ACVRL1, NOTCH1, TFRC, RNF14, HMGB2, HTRA1, HMGB1, PSEN1, THBS1, LARP1B, IRF2BPL, TIAL1, GJA1, ATXN2, TMSB4X, WDR5, HMOX1, HMGB1P1, MAP2K3, SMAD4, TGFB1, CRIM1, TRIP4, SREBF2, MID2, H1-2, BACE2, SELENOS, PLXNB2, TFAM, TCF4, ITM2B |
| regulation of protein localization             | 11 | 0.005286 | DNAJB2, MMP14, GJA1, SMAD4, TGFB1, TFRC, TMSB4X, ADAM9, CSNK1E, PSEN1, SREBF2                                                                                                                                                              |

|                                               |    |          |                                                                                                                                                                                                                                                            |
|-----------------------------------------------|----|----------|------------------------------------------------------------------------------------------------------------------------------------------------------------------------------------------------------------------------------------------------------------|
| multicellular organismal reproductive process | 11 | 0.005286 | TIAL1, H2AX, MMP14, GJA1, SMAD4, CCNB1, TGFB1, NOTCH1, ACE, MMP2, HMGB2                                                                                                                                                                                    |
| organic substance catabolic process           | 18 | 0.005315 | SMAD4, TGFB1, ACE, NOTCH1, RNF14, MMP2, TRIP4, ECE1, HMGB1, CSNK1E, AGAP3, PSEN1, DNAJB2, GJA1, HINT2, SELENOS, ADAM9, HMOX1                                                                                                                               |
| neural tube development                       | 5  | 0.005396 | RALA, TGFB1, NOTCH1, PLXNB2, PSEN1                                                                                                                                                                                                                         |
| positive regulation of neurogenesis           | 8  | 0.00544  | TGFB1, NOTCH1, ACE, FN1, PLXNB2, TCF4, CSNK1E, PSEN1                                                                                                                                                                                                       |
| nucleic acid-templated transcription          | 27 | 0.005466 | H2AX, ACVRL1, GTF3C1, NOTCH1, TFRC, RNF14, HMGB2, HTRA1, HMGB1, PSEN1, IRF2BPL, TIAL1, TMSB4X, WDR5, HMOX1, HMGB1P1, MAP2K3, SMAD4, TGFB1, CRIM1, TRIP4, SREBF2, MID2, H1-2, ERCC2, TFAM, TCF4                                                             |
| cardiac chamber development                   | 5  | 0.005624 | SMAD4, TGFB1, NOTCH1, MYL3, TGFB2                                                                                                                                                                                                                          |
| cellular protein metabolic process            | 36 | 0.005683 | ACVRL1, NOTCH1, TFRC, RNF14, HMGB1, PSEN1, AGAP3, THBS1, LARP1B, IRF2BPL, TIAL1, DNAJB2, ATXN2, CCNB1, HINT2, HERC1, WDR5, MAP2K3, SMAD4, TGFB1, ACE, MMP2, FN1, CRIM1, TRIP4, CSNK1E, MID1, MID2, TGFB2, DDB2, H1-2, MMP14, SELENOS, PLXNB2, ADAM9, ITGA5 |

|                                                 |    |          |                                                                                                                                                                                                |
|-------------------------------------------------|----|----------|------------------------------------------------------------------------------------------------------------------------------------------------------------------------------------------------|
| response to topologically incorrect protein     | 5  | 0.00574  | DNAJB2, SELENOS, DNAJB4, THBS1, HSPA13                                                                                                                                                         |
| cell-cell junction organization                 | 6  | 0.005763 | ACVRL1, MMP14, GJA1, TGFB1, ACE, THBS1                                                                                                                                                         |
| regulation of intracellular signal transduction | 17 | 0.005851 | MAP2K3, SMAD4, TGFB1, NOTCH1, TFRC, FN1, HMGB1, PSEN1, THBS1, MID1, MID2, TIAL1, GJA1, SELENOS, TMSB4X, ADAM9, HMOX1                                                                           |
| central nervous system development              | 12 | 0.005872 | H2AX, BACE2, TGFB1, NOTCH1, ACE, TMX2, HERC1, ERCC2, PLXNB2, CSNK1E, PSEN1, TGFBR2                                                                                                             |
| RNA biosynthetic process                        | 27 | 0.006034 | H2AX, ACVRL1, GTF3C1, NOTCH1, TFRC, RNF14, HMGB2, HTRA1, HMGB1, PSEN1, IRF2BPL, TIAL1, TMSB4X, WDR5, HMOX1, HMGB1P1, MAP2K3, SMAD4, TGFB1, CRIM1, TRIP4, SREBF2, MID2, H1-2, ERCC2, TFAM, TCF4 |
| multicellular organism reproduction             | 11 | 0.006071 | TIAL1, H2AX, MMP14, GJA1, SMAD4, CCNB1, TGFB1, NOTCH1, ACE, MMP2, HMGB2                                                                                                                        |
| regulation of response to external stimulus     | 11 | 0.006159 | GJA1, TGFB1, NOTCH1, ACE, SELENOS, TMSB4X, HTRA1, MOSPD2, HMGB1, THBS1, TGFBR2                                                                                                                 |
| reproductive process                            | 15 | 0.006241 | H2AX, SMAD4, TGFB1, ACE, NOTCH1, MMP2, HMGB2, HTRA1, TGFBR2, IRF2BPL, TIAL1, MMP14, GJA1, CCNB1, ITGA5                                                                                         |

|                                      |    |          |                                                                                                                                                                                                                                                                                                                              |
|--------------------------------------|----|----------|------------------------------------------------------------------------------------------------------------------------------------------------------------------------------------------------------------------------------------------------------------------------------------------------------------------------------|
| reproduction                         | 15 | 0.006342 | H2AX, SMAD4, TGFB1, ACE, NOTCH1, MMP2, HMGB2, HTRA1, TGFBR2, IRF2BPL, TIAL1, MMP14, GJA1, CCNB1, ITGA5                                                                                                                                                                                                                       |
| cellular response to stimulus        | 45 | 0.006374 | H2AX, ACVRL1, RALA, NOTCH1, TFRC, RNF14, HMGB2, HTRA1, MOSPD2, ECE1, HMGB1, PSEN1, AGAP3, THBS1, HSPA13, TIAL1, DNAJB2, EFNB1, GJA1, SMCHD1, CCNB1, TMSB4X, ATP6V0A2, HMOX1, MAP2K3, SMAD4, TGFB1, ACE, MMP2, FN1, CRIM1, TRIP4, CSNK1E, MID1, SREBF2, MID2, RHOB, TGFBR2, DDB2, MMP14, SELENOS, ERCC2, PLXNB2, ADAM9, ITGA5 |
| single organismal cell-cell adhesion | 9  | 0.006378 | EFNB1, TGFB1, NOTCH1, TFRC, FN1, ADAM9, HMGB1, ITGA5, TGFBR2                                                                                                                                                                                                                                                                 |
| Notch signaling pathway              | 5  | 0.006469 | MMP14, TGFB1, NOTCH1, PSEN1, TGFBR2                                                                                                                                                                                                                                                                                          |
| protein phosphorylation              | 17 | 0.00648  | MAP2K3, ACVRL1, SMAD4, TGFB1, ACE, NOTCH1, TFRC, FN1, HMGB1, CSNK1E, PSEN1, THBS1, MID1, TGFBR2, CCNB1, ADAM9, ITGA5                                                                                                                                                                                                         |
| cellular protein localization        | 17 | 0.00648  | RALA, SMAD4, TGFB1, NOTCH1, TFRC, KDELRL1, PSEN1, MID1, SREBF2, MID2, RHOB, MMP14, GJA1, SELENOS, TMSB4X, PREB, KDELRL2                                                                                                                                                                                                      |

|                                                      |    |          |                                                                                                                     |
|------------------------------------------------------|----|----------|---------------------------------------------------------------------------------------------------------------------|
| multi-organism reproductive process                  | 12 | 0.006608 | TIAL1, H2AX, GJA1, SMAD4, CCNB1, TGFB1, NOTCH1, ACE, MMP2, HMGB2, ITGA5, TGFBR2                                     |
| hematopoietic or lymphoid organ development          | 11 | 0.006658 | MMP14, TGFB1, NOTCH1, ACE, TFRC, KDEL1, ERCC2, HMGB2, HMGB1, PSEN1, TGFBR2                                          |
| chromatin assembly                                   | 5  | 0.006726 | H2AX, SMCHD1, HMGB2, HMGB1, H1-2                                                                                    |
| in utero embryonic development                       | 7  | 0.006777 | ACVRL1, SMAD4, CCNB1, RRM2, NOTCH1, ERCC2, TGFBR2                                                                   |
| negative regulation of cell proliferation            | 10 | 0.006798 | TIAL1, DNAJB2, ACVRL1, GJA1, SMAD4, TGFB1, NOTCH1, HMOX1, THBS1, TGFBR2                                             |
| positive regulation of transferase activity          | 9  | 0.006837 | MAP2K3, CCNB1, TGFB1, ACE, ADAM9, SERINC1, PSEN1, THBS1, TGFBR2                                                     |
| negative regulation of epithelial cell proliferation | 5  | 0.006856 | ACVRL1, GJA1, TGFB1, NOTCH1, THBS1                                                                                  |
| cellular macromolecule localization                  | 17 | 0.006896 | RALA, SMAD4, TGFB1, NOTCH1, TFRC, KDEL1, PSEN1, MID1, SREBF2, MID2, RHOB, MMP14, GJA1, SELENOS, TMSB4X, PREB, KDEL2 |

|                                                                |    |          |                                                                                                                                                                                                             |
|----------------------------------------------------------------|----|----------|-------------------------------------------------------------------------------------------------------------------------------------------------------------------------------------------------------------|
| regulation of immune system process                            | 15 | 0.006905 | TGFB1, ACE, NOTCH1, TFRC, HMGB2, HTRA1, MOSPD2, HMGB1, PSEN1, THBS1, TGFBR2, EFNB1, MMP14, SELENOS, HMOX1                                                                                                   |
| regulation of cell differentiation                             | 17 | 0.006929 | ACVRL1, SMAD4, TGFB1, ACE, NOTCH1, CRIM1, HMGB2, FN1, TRIP4, HMGB1, CSNK1E, PSEN1, TGFBR2, MMP14, GJA1, PLXNB2, TCF4                                                                                        |
| negative regulation of response to stimulus                    | 16 | 0.006993 | MAP2K3, SMAD4, TGFB1, NOTCH1, CRIM1, HMGB2, HTRA1, CSNK1E, PSEN1, THBS1, MMP14, GJA1, SMCHD1, SELENOS, TMSB4X, HMOX1                                                                                        |
| regulation of nucleobase-containing compound metabolic process | 29 | 0.007054 | H2AX, ACVRL1, NOTCH1, TFRC, RNF14, HMGB2, HTRA1, HMGB1, PSEN1, IRF2BPL, TIAL1, GJA1, SMCHD1, CCNB1, TMSB4X, WDR5, HMOX1, HMGB1P1, MAP2K3, SMAD4, TGFB1, CRIM1, TRIP4, SREBF2, MID2, H1-2, ERCC2, TFAM, TCF4 |
| negative regulation of cell communication                      | 14 | 0.007172 | MAP2K3, SMAD4, NOTCH1, CRIM1, HMGB2, HTRA1, CSNK1E, PSEN1, THBS1, MMP14, GJA1, SELENOS, TMSB4X, HMOX1                                                                                                       |
| negative regulation of signaling                               | 14 | 0.007373 | MAP2K3, SMAD4, NOTCH1, CRIM1, HMGB2, HTRA1, CSNK1E, PSEN1, THBS1, MMP14, GJA1, SELENOS, TMSB4X, HMOX1                                                                                                       |

|                                                |    |          |                                                                                |
|------------------------------------------------|----|----------|--------------------------------------------------------------------------------|
| myeloid cell differentiation                   | 7  | 0.00743  | TGFB1, TFRC, ERCC2, HMGB2, HMGB1, PSEN1, TGFBR2                                |
| MAPK cascade                                   | 10 | 0.007506 | MAP2K3, SMAD4, TGFB1, NOTCH1, FN1, ADAM9, HMGB1, PSEN1, THBS1, MID1            |
| signal transduction by protein phosphorylation | 10 | 0.007506 | MAP2K3, SMAD4, TGFB1, NOTCH1, FN1, ADAM9, HMGB1, PSEN1, THBS1, MID1            |
| striated muscle tissue development             | 7  | 0.007515 | GJA1, SMAD4, CCNB1, TGFB1, NOTCH1, MYL3, TGFBR2                                |
| positive regulation of MAPK cascade            | 8  | 0.007642 | MAP2K3, TGFB1, NOTCH1, ADAM9, HMGB1, PSEN1, THBS1, MID1                        |
| neuron development                             | 12 | 0.007749 | EFNB1, GJA1, SMAD4, NOTCH1, HERC1, MMP2, WDR5, FN1, PLXNB2, ECE1, HMGB1, PSEN1 |
| regulation of T cell proliferation             | 5  | 0.007818 | EFNB1, TGFB1, TFRC, HMGB1, TGFBR2                                              |
| regulation of protein localization to nucleus  | 5  | 0.007818 | SMAD4, TGFB1, TFRC, TMSB4X, PSEN1                                              |
| cellular homeostasis                           | 11 | 0.007859 | DNAJB2, GJA1, SMAD4, TGFB1, ACE, SELENOS, TFRC, ATP6V0A2, HMOX1, HMGB1, PSEN1  |
| skeletal system development                    | 8  | 0.007939 | ACVRL1, MMP14, GJA1, TGFB1, MMP2, WDR5, PSEN1, TGFBR2                          |

|                                         |    |          |                                                                                                                                  |
|-----------------------------------------|----|----------|----------------------------------------------------------------------------------------------------------------------------------|
| vascular process in circulatory system  | 5  | 0.007962 | GJA1, TGFB1, ACE, MMP2, ECE1                                                                                                     |
| peptidyl-amino acid modification        | 13 | 0.008076 | MAP2K3, SMAD4, TGFB1, ACE, TFRC, CSNK1E, PSEN1, TGFB2, H1-2, CCNB1, HINT2, WDR5, ITGA5                                           |
| morphogenesis of a branching epithelium | 5  | 0.008108 | MMP14, SMAD4, TGFB1, NOTCH1, TGFB2                                                                                               |
| cellular response to radiation          | 5  | 0.008108 | H2AX, TGFB1, MMP2, RHOB, DDB2                                                                                                    |
| cytokine production                     | 10 | 0.008148 | SMAD4, TGFB1, SELENOS, TMSB4X, HMGB2, FN1, HMOX1, HMGB1, PSEN1, THBS1                                                            |
| phosphorylation                         | 19 | 0.008164 | MAP2K3, ACVRL1, SMAD4, TGFB1, ACE, NOTCH1, TFRC, FN1, HMGB1, CSNK1E, PSEN1, THBS1, MID1, TGFB2, CCNB1, PLXNB2, ADAM9, TK1, ITGA5 |
| regulation of protein targeting         | 5  | 0.008406 | SMAD4, TGFB1, TMSB4X, PSEN1, SREBF2                                                                                              |
| regulation of protein catabolic process | 7  | 0.008588 | DNAJB2, GJA1, SMAD4, RNF14, ADAM9, CSNK1E, PSEN1                                                                                 |
| response to corticosteroid              | 5  | 0.00871  | TGFB1, NOTCH1, ACE, ADAM9, HMGB1                                                                                                 |
| muscle organ development                | 7  | 0.008873 | GJA1, SMAD4, CCNB1, TGFB1, NOTCH1, MYL3, TGFB2                                                                                   |
| nucleic acid metabolic process          | 36 | 0.008956 | H2AX, ACVRL1, GTF3C1, NOTCH1, TFRC, RNF14, HMGB2, HTRA1, HMGB1, PSEN1, IRF2BPL, TIAL1, GJA1, ATXN2,                              |



|                                                         |    |          |                                                                                                                                                        |
|---------------------------------------------------------|----|----------|--------------------------------------------------------------------------------------------------------------------------------------------------------|
|                                                         |    |          | SMCHD1, CCNB1, TMSB4X, WDR5, HMOX1, TK1, HMGB1P1, MAP2K3, SMAD4, TGFB1, RRM2, CRIM1, TRIP4, CSNK1E, NOC3L, SREBF2, MID2, DDB2, H1-2, ERCC2, TFAM, TCF4 |
| response to drug                                        | 7  | 0.009164 | CCNB1, TGFB1, TFRC, ADAM9, HMOX1, THBS1, TGFBR2                                                                                                        |
| negative regulation of cell growth                      | 5  | 0.00918  | DNAJB2, ACVRL1, GJA1, SMAD4, TGFB1                                                                                                                     |
| defense response                                        | 16 | 0.009396 | MAP2K3, TGFB1, ACE, NOTCH1, TFRC, HMGB2, HTRA1, FN1, HMGB1, THBS1, MID2, TIAL1, GJA1, SELENOS, TMSB4X, HMOX1                                           |
| positive regulation of cellular amide metabolic process | 5  | 0.009666 | TGFB1, PLXNB2, CSNK1E, THBS1, LARP1B                                                                                                                   |
| metal ion homeostasis                                   | 9  | 0.009672 | GJA1, SMAD4, TGFB1, ACE, TFRC, ATP6V0A2, HMOX1, HMGB1, PSEN1                                                                                           |
| ossification                                            | 7  | 0.009767 | MMP14, SMAD4, TGFB1, NOTCH1, MMP2, ERCC2, CRIM1                                                                                                        |
| immune system development                               | 11 | 0.009905 | MMP14, TGFB1, NOTCH1, ACE, TFRC, KDELR1, ERCC2, HMGB2, HMGB1, PSEN1, TGFBR2                                                                            |
| regulation of carbohydrate metabolic process            | 5  | 0.01     | TGFB1, SELENOS, WDR5, HMGB1, PSEN1                                                                                                                     |

|                                                   |    |          |                                                                                                                                                               |
|---------------------------------------------------|----|----------|---------------------------------------------------------------------------------------------------------------------------------------------------------------|
| positive regulation of MAP kinase activity        | 5  | 0.01     | MAP2K3, TGFB1, ADAM9, PSEN1, THBS1                                                                                                                            |
| negative regulation of signal transduction        | 13 | 0.010009 | MAP2K3, SMAD4, NOTCH1, CRIM1, HMGB2, HTRA1, CSNK1E, PSEN1, THBS1, MMP14, SELENOS, TMSB4X, HMOX1                                                               |
| muscle tissue development                         | 7  | 0.010079 | GJA1, SMAD4, CCNB1, TGFB1, NOTCH1, MYL3, TGFBR2                                                                                                               |
| chromatin assembly or disassembly                 | 5  | 0.010169 | H2AX, SMCHD1, HMGB2, HMGB1, H1-2                                                                                                                              |
| immune system process                             | 22 | 0.010344 | TGFB1, ACE, NOTCH1, TFRC, KDELR1, HMGB2, HTRA1, MOSPD2, HMGB1, PSEN1, THBS1, MID2, TGFBR2, EFN1, MMP14, SELENOS, FCGRT, ERCC2, ATP6V0A2, ADAM9, HMOX1, HMGN2  |
| positive regulation of nervous system development | 8  | 0.010355 | TGFB1, NOTCH1, ACE, FN1, PLXNB2, TCF4, CSNK1E, PSEN1                                                                                                          |
| single-organism transport                         | 22 | 0.010612 | RALA, SMAD4, TGFB1, ACE, NOTCH1, TFRC, OSBPL3, HMGB1, PSEN1, THBS1, SREBF2, ATXN2, GJA1, SELENOS, FCGRT, TMSB4X, ATP6V0A2, ADAM9, HMOX1, PREB, ATP5MJ, TXNDC5 |
| positive regulation of kinase activity            | 8  | 0.010632 | MAP2K3, CCNB1, TGFB1, ACE, ADAM9, PSEN1, THBS1, TGFBR2                                                                                                        |

|                                                                   |    |          |                                                                                                                                                                                            |
|-------------------------------------------------------------------|----|----------|--------------------------------------------------------------------------------------------------------------------------------------------------------------------------------------------|
| mononuclear cell proliferation                                    | 6  | 0.010705 | EFNB1, TGFB1, ACE, TFRC, HMGB1, TGFBR2                                                                                                                                                     |
| regulation of blood pressure                                      | 5  | 0.011044 | ACVRL1, GJA1, ACE, HMOX1, ECE1                                                                                                                                                             |
| morphogenesis of a branching structure                            | 5  | 0.011044 | MMP14, SMAD4, TGFB1, NOTCH1, TGFBR2                                                                                                                                                        |
| cellular protein modification process                             | 27 | 0.011046 | ACVRL1, NOTCH1, TFRC, RNF14, HMGB1, PSEN1, THBS1, IRF2BPL, DNAJB2, CCNB1, HINT2, HERC1, WDR5, MAP2K3, SMAD4, TGFB1, ACE, FN1, CSNK1E, MID1, MID2, TGFBR2, DDB2, H1-2, PLXNB2, ADAM9, ITGA5 |
| protein modification process                                      | 27 | 0.011046 | ACVRL1, NOTCH1, TFRC, RNF14, HMGB1, PSEN1, THBS1, IRF2BPL, DNAJB2, CCNB1, HINT2, HERC1, WDR5, MAP2K3, SMAD4, TGFB1, ACE, FN1, CSNK1E, MID1, MID2, TGFBR2, DDB2, H1-2, PLXNB2, ADAM9, ITGA5 |
| proteasome-mediated ubiquitin-dependent protein catabolic process | 7  | 0.011058 | DNAJB2, SELENOS, RNF14, TRIP4, AGAP3, CSNK1E, PSEN1                                                                                                                                        |
| leukocyte activation                                              | 11 | 0.011104 | EFNB1, MMP14, TGFB1, TFRC, KDEL1, ADAM9, HMOX1, HMGB1, PSEN1, THBS1, TGFBR2                                                                                                                |
| axonogenesis                                                      | 7  | 0.011171 | EFNB1, SMAD4, NOTCH1, FN1, PLXNB2, ECE1, PSEN1                                                                                                                                             |
| primary metabolic process                                         | 61 | 0.0112   | H2AX, ACVRL1, TFRC, RNF14, HMGB2, ECE1, HMGB1, LARP1B, IRF2BPL, TIAL1, GJA1, SMCHD1, HINT2, HERC1, TMSB4X, WDR5, TK1, HMGB1P1, MAP2K3, MMP2,                                               |

|                                                                 |   |          |                                                                                                                                                                                                                                                                                                    |
|-----------------------------------------------------------------|---|----------|----------------------------------------------------------------------------------------------------------------------------------------------------------------------------------------------------------------------------------------------------------------------------------------------------|
|                                                                 |   |          | CSNK1E, MID1, MID2, SREBF2, TGFBR2, DDB2, BACE2, MMP14, SELENOS, ADAM9, TFAM, ITGA5, GTF3C1, NOTCH1, RETSAT, HTRA1, PSEN1, AGAP3, THBS1, DNAJB2, CYB5R1, ATXN2, CCNB1, DGLUCY, HMOX1, ATP5MJ, SMAD4, TGFB1, RRM2, ACE, OSBPL3, FN1, CRIM1, TRIP4, NOC3L, H1-2, ERCC2, PLXNB2, TCF4, SERINC1, ITM2B |
| protein import into nucleus                                     | 5 | 0.011225 | SMAD4, TGFB1, NOTCH1, TMSB4X, PSEN1                                                                                                                                                                                                                                                                |
| T cell proliferation                                            | 5 | 0.011225 | EFNB1, TGFB1, TFRC, HMGB1, TGFBR2                                                                                                                                                                                                                                                                  |
| protein targeting to nucleus                                    | 5 | 0.011225 | SMAD4, TGFB1, NOTCH1, TMSB4X, PSEN1                                                                                                                                                                                                                                                                |
| single-organism nuclear import                                  | 5 | 0.011225 | SMAD4, TGFB1, NOTCH1, TMSB4X, PSEN1                                                                                                                                                                                                                                                                |
| positive regulation of protein serine/threonine kinase activity | 6 | 0.011251 | MAP2K3, CCNB1, TGFB1, ADAM9, PSEN1, THBS1                                                                                                                                                                                                                                                          |
| muscle structure development                                    | 9 | 0.011296 | MMP14, GJA1, SMAD4, CCNB1, TGFB1, NOTCH1, MYL3, TRIP4, TGFBR2                                                                                                                                                                                                                                      |
| positive regulation of DNA metabolic process                    | 6 | 0.011531 | H2AX, SMCHD1, TGFB1, TFRC, ERCC2, HMGB1                                                                                                                                                                                                                                                            |

|                                                    |    |          |                                                                                                                                                                                              |
|----------------------------------------------------|----|----------|----------------------------------------------------------------------------------------------------------------------------------------------------------------------------------------------|
| regulation of transport                            | 16 | 0.011613 | RALA, SMAD4, TGFB1, ACE, NOTCH1, HMGB1, PSEN1, THBS1, SREBF2, ATXN2, GJA1, SELENOS, TMSB4X, ADAM9, HMOX1, PREB                                                                               |
| phosphate-containing compound<br>metabolic process | 23 | 0.011771 | MAP2K3, ACVRL1, SMAD4, TGFB1, RRM2, ACE, NOTCH1, TFRC, FN1, HMGB1, CSNK1E, PSEN1, THBS1, MID1, TGFB2, CCNB1, TMSB4X, PLXNB2, ADAM9, SERINC1, ATP5MJ, TK1, ITGA5                              |
| cell chemotaxis                                    | 6  | 0.011816 | NOTCH1, TMSB4X, MOSPD2, HMGB2, HMGB1, THBS1                                                                                                                                                  |
| regulation of hemopoiesis                          | 7  | 0.011865 | MMP14, TGFB1, NOTCH1, ACE, HMGB2, HMGB1, TGFB2                                                                                                                                               |
| organic substance transport                        | 20 | 0.011871 | SMAD4, TGFB1, ACE, NOTCH1, TFRC, KDELR1, OSBPL3, PSEN1, THBS1, SREBF2, RHOB, TGFB2, CYB5R1, ATXN2, GJA1, SELENOS, TMSB4X, ADAM9, PREB, KDELR2                                                |
| nuclear import                                     | 5  | 0.011967 | SMAD4, TGFB1, NOTCH1, TMSB4X, PSEN1                                                                                                                                                          |
| positive regulation of cell development            | 8  | 0.012102 | TGFB1, NOTCH1, ACE, FN1, PLXNB2, TCF4, CSNK1E, PSEN1                                                                                                                                         |
| cellular metabolic process                         | 61 | 0.012202 | H2AX, ACVRL1, TFRC, RNF14, HMGB2, ECE1, HMGB1, LARP1B, IRF2BPL, TIAL1, GJA1, SMCHD1, HINT2, HERC1, TMSB4X, WDR5, TK1, HMGB1P1, MAP2K3, MMP2, CSNK1E, MID1, MID2, SREBF2, TGFB2, DDB2, BACE2, |

|                                             |    |          |                                                                                                                                                                                                                                                                                                                                       |
|---------------------------------------------|----|----------|---------------------------------------------------------------------------------------------------------------------------------------------------------------------------------------------------------------------------------------------------------------------------------------------------------------------------------------|
|                                             |    |          | MMP14, SELENOS, ADAM9, TFAM, ITGA5, GTF3C1, NOTCH1, RETSAT, HTRA1, PSEN1, AGAP3, THBS1, DNAJB2, ATXN2, CCNB1, DGLUCY, ATP6V0A2, HMOX1, ATP5MJ, SMAD4, TGFB1, RRM2, ACE, OSBPL3, FN1, CRIM1, TRIP4, NOC3L, H1-2, ERCC2, PLXNB2, TCF4, SERINC1, ITM2B                                                                                   |
| regulation of cellular protein localization | 8  | 0.012205 | MMP14, SMAD4, TGFB1, TFRC, TMSB4X, CSNK1E, PSEN1, SREBF2                                                                                                                                                                                                                                                                              |
| single organism cell adhesion               | 9  | 0.012363 | EFNB1, TGFB1, NOTCH1, TFRC, FN1, ADAM9, HMGB1, ITGA5, TGFB2                                                                                                                                                                                                                                                                           |
| gliogenesis                                 | 6  | 0.0124   | BACE2, MMP14, TGFB1, NOTCH1, ERCC2, PSEN1                                                                                                                                                                                                                                                                                             |
| sensory organ development                   | 8  | 0.012623 | ACVRL1, SMCHD1, TGFB1, NOTCH1, ECE1, HMGB1, PSEN1, TGFB2                                                                                                                                                                                                                                                                              |
| nitrogen compound metabolic process         | 46 | 0.012745 | H2AX, ACVRL1, GTF3C1, NOTCH1, TFRC, RNF14, HMGB2, HTRA1, ECE1, HMGB1, PSEN1, THBS1, LARP1B, IRF2BPL, TIAL1, GJA1, ATXN2, SMCHD1, CCNB1, TMSB4X, DGLUCY, WDR5, HMOX1, ATP5MJ, TK1, HMGB1P1, MAP2K3, SMAD4, TGFB1, RRM2, ACE, CRIM1, TRIP4, CSNK1E, NOC3L, SREBF2, MID2, DDB2, H1-2, BACE2, SELENOS, ERCC2, PLXNB2, TFAM, TCF4, SERINC1 |

|                                                 |    |          |                                                                                                                                                                                                                                                |
|-------------------------------------------------|----|----------|------------------------------------------------------------------------------------------------------------------------------------------------------------------------------------------------------------------------------------------------|
| cell surface receptor signaling pathway         | 21 | 0.012822 | ACVRL1, SMAD4, TGFB1, NOTCH1, MMP2, CRIM1, HMGB2, HTRA1, FN1, ECE1, CSNK1E, PSEN1, THBS1, TGFB2, EFNB1, MMP14, TMSB4X, PLXNB2, ADAM9, HMOX1, ITGA5                                                                                             |
| embryonic organ development                     | 7  | 0.013215 | MMP14, TGFB1, NOTCH1, ERCC2, ECE1, PSEN1, TGFB2                                                                                                                                                                                                |
| cellular nitrogen compound biosynthetic process | 34 | 0.013226 | H2AX, ACVRL1, GTF3C1, NOTCH1, TFRC, RNF14, HMGB2, HTRA1, HMGB1, PSEN1, THBS1, LARP1B, IRF2BPL, TIAL1, GJA1, TMSB4X, WDR5, HMOX1, ATP5MJ, TK1, HMGB1P1, MAP2K3, SMAD4, TGFB1, RRM2, CRIM1, TRIP4, SREBF2, MID2, H1-2, ERCC2, PLXNB2, TFAM, TCF4 |
| positive regulation of protein transport        | 6  | 0.013468 | GJA1, SMAD4, TGFB1, ADAM9, PSEN1, SREBF2                                                                                                                                                                                                       |
| negative regulation of organelle organization   | 7  | 0.013602 | SMAD4, CCNB1, TFRC, TMSB4X, WDR5, MID1, H1-2                                                                                                                                                                                                   |
| regulation of transcription, DNA-templated      | 25 | 0.013682 | H2AX, ACVRL1, NOTCH1, TFRC, RNF14, HMGB2, HTRA1, HMGB1, PSEN1, IRF2BPL, TIAL1, TMSB4X, WDR5, HMOX1, HMGB1P1, MAP2K3, SMAD4, TGFB1, CRIM1, TRIP4, SREBF2, MID2, H1-2, TFAM, TCF4                                                                |
| muscle system process                           | 7  | 0.013732 | MAP2K3, GJA1, SMAD4, NOTCH1, MYL1, MYL3, HMOX1                                                                                                                                                                                                 |

|                                                    |    |          |                                                                                                                                                                                                                                |
|----------------------------------------------------|----|----------|--------------------------------------------------------------------------------------------------------------------------------------------------------------------------------------------------------------------------------|
| regulation of nucleic acid-templated transcription | 25 | 0.01377  | H2AX, ACVRL1, NOTCH1, TFRC, RNF14, HMGB2, HTRA1, HMGB1, PSEN1, IRF2BPL, TIAL1, TMSB4X, WDR5, HMOX1, HMGB1P1, MAP2K3, SMAD4, TGFB1, CRIM1, TRIP4, SREBF2, MID2, H1-2, TFAM, TCF4                                                |
| pattern specification process                      | 7  | 0.013863 | ACVRL1, EFNB1, SMAD4, NOTCH1, PSEN1, MID1, TGFB2                                                                                                                                                                               |
| establishment of localization                      | 31 | 0.013982 | RALA, NOTCH1, TFRC, KDEL1, HMGB1, PSEN1, ANTXR2, THBS1, CYB5R1, GJA1, ATXN2, CCNB1, FCGRT, TMSB4X, ATP6V0A2, HMOX1, ATP5MJ, TXNDC5, SMAD4, TGFB1, ACE, OSBPL3, TRIP4, CSNK1E, SREBF2, RHOB, TGFB2, SELENOS, ADAM9, PREB, KDEL2 |
| positive regulation of leukocyte activation        | 7  | 0.013996 | EFNB1, MMP14, TGFB1, TFRC, HMGB1, THBS1, TGFB2                                                                                                                                                                                 |
| cell projection organization                       | 14 | 0.014044 | RALA, SMAD4, NOTCH1, MMP2, FN1, ECE1, HMGB1, PSEN1, TTC17, EFNB1, GJA1, HERC1, WDR5, PLXNB2                                                                                                                                    |
| regulation of RNA metabolic process                | 26 | 0.014455 | H2AX, ACVRL1, NOTCH1, TFRC, RNF14, HMGB2, HTRA1, HMGB1, PSEN1, IRF2BPL, TIAL1, CCNB1, TMSB4X, WDR5, HMOX1, HMGB1P1, MAP2K3, SMAD4, TGFB1, CRIM1, TRIP4, SREBF2, MID2, H1-2, TFAM, TCF4                                         |



|                                           |    |          |                                                                                                                                                                                                                                                                                           |
|-------------------------------------------|----|----------|-------------------------------------------------------------------------------------------------------------------------------------------------------------------------------------------------------------------------------------------------------------------------------------------|
| regulation of RNA biosynthetic process    | 25 | 0.014491 | H2AX, ACVRL1, NOTCH1, TFRC, RNF14, HMGB2, HTRA1, HMGB1, PSEN1, IRF2BPL, TIAL1, TMSB4X, WDR5, HMOX1, HMGB1P1, MAP2K3, SMAD4, TGFB1, CRIM1, TRIP4, SREBF2, MID2, H1-2, TFAM, TCF4                                                                                                           |
| cellular metal ion homeostasis            | 8  | 0.014634 | GJA1, SMAD4, TGFB1, TFRC, ATP6V0A2, HMOX1, HMGB1, PSEN1                                                                                                                                                                                                                                   |
| cellular response to abiotic stimulus     | 6  | 0.014764 | H2AX, GJA1, TGFB1, MMP2, RHOB, DDB2                                                                                                                                                                                                                                                       |
| protein localization to nucleus           | 6  | 0.014764 | SMAD4, TGFB1, NOTCH1, TFRC, TMSB4X, PSEN1                                                                                                                                                                                                                                                 |
| gland development                         | 7  | 0.014808 | SMAD4, TGFB1, NOTCH1, MMP2, HMOX1, PSEN1, TGFB2                                                                                                                                                                                                                                           |
| organic cyclic compound metabolic process | 40 | 0.015056 | H2AX, ACVRL1, GTF3C1, NOTCH1, TFRC, RNF14, HMGB2, HTRA1, HMGB1, PSEN1, IRF2BPL, TIAL1, CYB5R1, GJA1, ATXN2, SMCHD1, CCNB1, HINT2, TMSB4X, WDR5, HMOX1, ATP5MJ, TK1, HMGB1P1, MAP2K3, SMAD4, TGFB1, RRM2, OSBPL3, CRIM1, TRIP4, CSNK1E, NOC3L, SREBF2, MID2, DDB2, H1-2, ERCC2, TFAM, TCF4 |
| biological regulation                     | 66 | 0.015162 | H2AX, ACVRL1, TFRC, RNF14, KDELR1, HMGB2, ECE1, HMGB1, LARP1B, IRF2BPL, TIAL1, GJA1, SMCHD1, HINT2, HERC1, TMSB4X, POTEJ, WDR5, HMGN2, HMGB1P1, MAP2K3, MMP2, CSNK1E, MID1, MID2,                                                                                                         |

|                                 |    |          |                                                                                                                                                                                                                                                                                                  |
|---------------------------------|----|----------|--------------------------------------------------------------------------------------------------------------------------------------------------------------------------------------------------------------------------------------------------------------------------------------------------|
|                                 |    |          | SREBF2, RHOB, TGFBR2, BACE2, MMP14, EMCN, SELENOS, MYL3, ADAM9, TFAM, PREB, KDELR2, ITGA5, RALA, NOTCH1, RETSAT, HTRA1, MOSPD2, PSEN1, AGAP3, THBS1, DNAJB2, EFNB1, ATXN2, CCNB1, ATP6V0A2, HMOX1, TXNDC5, SMAD4, TGFB1, RRM2, ACE, FN1, CRIM1, TRIP4, H1-2, ERCC2, PLXNB2, TCF4, SERINC1, ITM2B |
| neuron projection morphogenesis | 8  | 0.015231 | EFNB1, GJA1, SMAD4, NOTCH1, FN1, PLXNB2, ECE1, PSEN1                                                                                                                                                                                                                                             |
| leukocyte proliferation         | 6  | 0.015271 | EFNB1, TGFB1, ACE, TFRC, HMGB1, TGFBR2                                                                                                                                                                                                                                                           |
| transport                       | 30 | 0.015453 | RALA, NOTCH1, TFRC, KDELR1, HMGB1, PSEN1, ANTXR2, THBS1, CYB5R1, GJA1, ATXN2, FCGRT, TMSB4X, ATP6V0A2, HMOX1, ATP5MJ, TXNDC5, SMAD4, TGFB1, ACE, OSBPL3, TRIP4, CSNK1E, SREBF2, RHOB, TGFBR2, SELENOS, ADAM9, PREB, KDELR2                                                                       |
| sexual reproduction             | 10 | 0.016092 | TIAL1, H2AX, GJA1, SMAD4, CCNB1, TGFB1, NOTCH1, ACE, MMP2, HMGB2                                                                                                                                                                                                                                 |
| phosphorus metabolic process    | 23 | 0.016106 | MAP2K3, ACVRL1, SMAD4, TGFB1, RRM2, ACE, NOTCH1, TFRC, FN1, HMGB1, CSNK1E, PSEN1, THBS1, MID1,                                                                                                                                                                                                   |

|                                                              |    |          |                                                                                        |
|--------------------------------------------------------------|----|----------|----------------------------------------------------------------------------------------|
|                                                              |    |          | TGFBR2, CCNB1, TMSB4X, PLXNB2, ADAM9, SERINC1, ATP5MJ, TK1, ITGA5                      |
| single organism reproductive process                         | 13 | 0.016193 | H2AX, SMAD4, TGFB1, ACE, NOTCH1, MMP2, HMGB2, HTRA1, TGFBR2, TIAL1, MMP14, GJA1, CCNB1 |
| proteasomal protein catabolic process                        | 7  | 0.016382 | DNAJB2, SELENOS, RNF14, TRIP4, AGAP3, CSNK1E, PSEN1                                    |
| heart contraction                                            | 5  | 0.016609 | MAP2K3, GJA1, ACE, MYL1, MYL3                                                          |
| positive regulation of establishment of protein localization | 6  | 0.016861 | GJA1, SMAD4, TGFB1, ADAM9, PSEN1, SREBF2                                               |
| establishment of protein localization to organelle           | 7  | 0.016982 | SMAD4, RALA, TGFB1, NOTCH1, TMSB4X, PSEN1, SREBF2                                      |
| positive regulation of hemopoiesis                           | 5  | 0.017079 | MMP14, TGFB1, HMGB2, HMGB1, TGFBR2                                                     |
| glial cell differentiation                                   | 5  | 0.017079 | BACE2, TGFB1, NOTCH1, ERCC2, PSEN1                                                     |
| cation homeostasis                                           | 9  | 0.017153 | GJA1, SMAD4, TGFB1, ACE, TFRC, ATP6V0A2, HMOX1, HMGB1, PSEN1                           |
| cell projection morphogenesis                                | 8  | 0.017393 | EFNB1, GJA1, SMAD4, NOTCH1, FN1, PLXNB2, ECE1, PSEN1                                   |

|                                                                         |    |          |                                                                                                                           |
|-------------------------------------------------------------------------|----|----------|---------------------------------------------------------------------------------------------------------------------------|
| skeletal system morphogenesis                                           | 5  | 0.017558 | MMP14, TGFB1, MMP2, PSEN1, TGFBR2                                                                                         |
| negative regulation of apoptotic signaling pathway                      | 5  | 0.017558 | SELENOS, HMGB2, HMOX1, PSEN1, THBS1                                                                                       |
| positive regulation of cell activation                                  | 7  | 0.017911 | EFNB1, MMP14, TGFB1, TFRC, HMGB1, THBS1, TGFBR2                                                                           |
| axon guidance                                                           | 5  | 0.018045 | EFNB1, SMAD4, NOTCH1, PLXNB2, ECE1                                                                                        |
| cellular catabolic process                                              | 17 | 0.018161 | TGFB1, ACE, RNF14, TRIP4, ECE1, HMGB1, CSNK1E, AGAP3, PSEN1, SREBF2, MID2, DNAJB2, SELENOS, HERC1, ATP6V0A2, ADAM9, HMOX1 |
| negative regulation of nucleobase-containing compound metabolic process | 14 | 0.018163 | H2AX, ACVRL1, SMAD4, TGFB1, NOTCH1, HMGB2, HMGB1, PSEN1, SREBF2, MID2, IRF2BPL, H1-2, GJA1, SMCHD1                        |
| neuron projection guidance                                              | 5  | 0.018292 | EFNB1, SMAD4, NOTCH1, PLXNB2, ECE1                                                                                        |
| regulation of autophagy                                                 | 6  | 0.018364 | HERC1, ATP6V0A2, HMOX1, HMGB1, SREBF2, MID2                                                                               |
| response to reactive oxygen species                                     | 5  | 0.018792 | MMP2, ADAM9, HMOX1, AGAP3, RHOB                                                                                           |
| heart process                                                           | 5  | 0.019045 | MAP2K3, GJA1, ACE, MYL1, MYL3                                                                                             |
| inorganic ion homeostasis                                               | 9  | 0.019097 | GJA1, SMAD4, TGFB1, ACE, TFRC, ATP6V0A2, HMOX1, HMGB1, PSEN1                                                              |

|                                                      |    |          |                                                                                      |
|------------------------------------------------------|----|----------|--------------------------------------------------------------------------------------|
| regulation of organelle organization                 | 13 | 0.019282 | RALA, SMAD4, TGFB1, TFRC, MID1, SREBF2, RHOB, H1-2, ATXN2, CCNB1, TMSB4X, WDR5, PREB |
| regulation of lymphocyte proliferation               | 5  | 0.0193   | EFNB1, TGFB1, TFRC, HMGB1, TGFBR2                                                    |
| regulation of chromatin organization                 | 5  | 0.0193   | SMAD4, CCNB1, TGFB1, WDR5, H1-2                                                      |
| regulation of intracellular transport                | 7  | 0.019535 | SMAD4, TGFB1, TMSB4X, HMOX1, PREB, PSEN1, SREBF2                                     |
| regulation of muscle cell differentiation            | 5  | 0.019817 | MMP14, SMAD4, TGFB1, NOTCH1, TRIP4                                                   |
| cell part morphogenesis                              | 8  | 0.01991  | EFNB1, GJA1, SMAD4, NOTCH1, FN1, PLXNB2, ECE1, PSEN1                                 |
| cellular component morphogenesis                     | 11 | 0.020012 | EFNB1, GJA1, SMAD4, TGFB1, NOTCH1, ERCC2, FN1, PLXNB2, ECE1, PSEN1, RHOB             |
| gonad development                                    | 5  | 0.020342 | MMP14, SMAD4, ACE, MMP2, HMGB2                                                       |
| regulation of mononuclear cell proliferation         | 5  | 0.020342 | EFNB1, TGFB1, TFRC, HMGB1, TGFBR2                                                    |
| nucleoside monophosphate metabolic process           | 6  | 0.020364 | CCNB1, TGFB1, TMSB4X, ATP5MJ, TK1, PSEN1                                             |
| positive regulation of response to external stimulus | 6  | 0.020571 | TGFB1, ACE, TMSB4X, MOSPD2, HMGB1, THBS1                                             |

|                                                           |    |          |                                                                                                                                                                                                                                                                                       |
|-----------------------------------------------------------|----|----------|---------------------------------------------------------------------------------------------------------------------------------------------------------------------------------------------------------------------------------------------------------------------------------------|
| negative regulation of macromolecule biosynthetic process | 17 | 0.020867 | H2AX, ACVRL1, SMAD4, TGFB1, NOTCH1, HMGB2, HMGB1, PSEN1, SREBF2, MID2, IRF2BPL, H1-2, TIAL1, BACE2, GJA1, SELENOS, ITM2B                                                                                                                                                              |
| brain development                                         | 9  | 0.021061 | H2AX, NOTCH1, ACE, TMX2, HERC1, PLXNB2, CSNK1E, PSEN1, TGFBR2                                                                                                                                                                                                                         |
| positive regulation of T cell activation                  | 5  | 0.021418 | EFNB1, TGFB1, TFRC, HMGB1, TGFBR2                                                                                                                                                                                                                                                     |
| macromolecule modification                                | 27 | 0.021474 | ACVRL1, NOTCH1, TFRC, RNF14, HMGB1, PSEN1, THBS1, IRF2BPL, DNAJB2, CCNB1, HINT2, HERC1, WDR5, MAP2K3, SMAD4, TGFB1, ACE, FN1, CSNK1E, MID1, MID2, TGFBR2, DDB2, H1-2, PLXNB2, ADAM9, ITGA5                                                                                            |
| autophagy                                                 | 7  | 0.021794 | HERC1, ATP6V0A2, HMOX1, HMGB1, PSEN1, SREBF2, MID2                                                                                                                                                                                                                                    |
| positive regulation of immune system process              | 11 | 0.021804 | EFNB1, MMP14, TGFB1, TFRC, MOSPD2, HMGB2, HMOX1, HMGB1, PSEN1, THBS1, TGFBR2                                                                                                                                                                                                          |
| macromolecule metabolic process                           | 55 | 0.021861 | H2AX, ACVRL1, TFRC, RNF14, HMGB2, ECE1, HMGB1, LARP1B, IRF2BPL, TIAL1, GJA1, SMCHD1, HINT2, HERC1, TMSB4X, WDR5, TK1, HMGB1P1, MAP2K3, MMP2, CSNK1E, MID1, MID2, SREBF2, TGFBR2, DDB2, BACE2, MMP14, SELENOS, ADAM9, TFAM, ITGA5, GTF3C1, NOTCH1, HTRA1, PSEN1, AGAP3, THBS1, DNAJB2, |

|                                               |    |          |                                                                                                                                      |
|-----------------------------------------------|----|----------|--------------------------------------------------------------------------------------------------------------------------------------|
|                                               |    |          | ATXN2, CCNB1, HMOX1, SMAD4, TGFB1, RRM2, ACE, FN1, CRIM1, TRIP4, NOC3L, H1-2, ERCC2, PLXNB2, TCF4, ITM2B                             |
| negative regulation of developmental process  | 11 | 0.02192  | ACVRL1, GJA1, SMAD4, TGFB1, NOTCH1, TFRC, CRIM1, HMGB1, PSEN1, THBS1, TGFB2                                                          |
| development of primary sexual characteristics | 5  | 0.021969 | MMP14, SMAD4, ACE, MMP2, HMGB2                                                                                                       |
| regulation of secretion                       | 8  | 0.022196 | GJA1, SMAD4, RALA, TGFB1, NOTCH1, ACE, ADAM9, HMOX1                                                                                  |
| regulation of cellular localization           | 10 | 0.02237  | MMP14, SMAD4, TGFB1, TFRC, TMSB4X, HMOX1, PREB, CSNK1E, PSEN1, SREBF2                                                                |
| chromosome organization                       | 12 | 0.022555 | H2AX, SMCHD1, SMAD4, CCNB1, TGFB1, ERCC2, WDR5, HMGB2, HMGB1, HMGN2, DDB2, H1-2                                                      |
| protein localization                          | 19 | 0.023416 | RALA, SMAD4, TGFB1, NOTCH1, TFRC, KDELR1, CSNK1E, PSEN1, MID1, SREBF2, MID2, RHOB, MMP14, GJA1, SELENOS, TMSB4X, ADAM9, PREB, KDELR2 |
| response to bacterium                         | 9  | 0.023456 | MAP2K3, GJA1, TGFB1, NOTCH1, ACE, SELENOS, HMGB2, ADAM9, HMGB1                                                                       |

|                                                  |    |          |                                                                                                                                                                                                                                                                                                             |
|--------------------------------------------------|----|----------|-------------------------------------------------------------------------------------------------------------------------------------------------------------------------------------------------------------------------------------------------------------------------------------------------------------|
| protein-DNA complex assembly                     | 5  | 0.023674 | H2AX, HMGB2, TCF4, HMGB1, H1-2                                                                                                                                                                                                                                                                              |
| secretion                                        | 10 | 0.024353 | GJA1, SMAD4, RALA, TGFB1, NOTCH1, ACE, ADAM9, HMOX1, PREB, PSEN1                                                                                                                                                                                                                                            |
| cellular nitrogen compound metabolic process     | 43 | 0.024355 | H2AX, ACVRL1, GTF3C1, NOTCH1, TFRC, RNF14, HMGB2, HTRA1, ECE1, HMGB1, PSEN1, THBS1, LARP1B, IRF2BPL, TIAL1, GJA1, ATXN2, SMCHD1, CCNB1, TMSB4X, WDR5, HMOX1, ATP5MJ, TK1, HMGB1P1, MAP2K3, SMAD4, TGFB1, RRM2, ACE, CRIM1, TRIP4, CSNK1E, NOC3L, SREBF2, MID2, DDB2, H1-2, BACE2, ERCC2, PLXNB2, TFAM, TCF4 |
| nucleobase-containing compound metabolic process | 37 | 0.025057 | H2AX, ACVRL1, GTF3C1, NOTCH1, TFRC, RNF14, HMGB2, HTRA1, HMGB1, PSEN1, IRF2BPL, TIAL1, GJA1, ATXN2, SMCHD1, CCNB1, TMSB4X, WDR5, HMOX1, ATP5MJ, TK1, HMGB1P1, MAP2K3, SMAD4, TGFB1, RRM2, CRIM1, TRIP4, CSNK1E, NOC3L, SREBF2, MID2, DDB2, H1-2, ERCC2, TFAM, TCF4                                          |
| regulation of leukocyte activation               | 8  | 0.025346 | EFNB1, MMP14, TGFB1, TFRC, HMOX1, HMGB1, THBS1, TGFB2                                                                                                                                                                                                                                                       |
| developmental growth                             | 8  | 0.025346 | GJA1, SMAD4, CCNB1, TGFB1, NOTCH1, ERCC2, FN1, TGFB2                                                                                                                                                                                                                                                        |



|                                                      |    |          |                                                                                                                          |
|------------------------------------------------------|----|----------|--------------------------------------------------------------------------------------------------------------------------|
| secretion by cell                                    | 9  | 0.025569 | GJA1, SMAD4, RALA, TGFB1, NOTCH1, ADAM9, HMOX1, PREB, PSEN1                                                              |
| establishment of protein localization                | 15 | 0.025699 | RALA, SMAD4, TGFB1, NOTCH1, TFRC, KDELR1, PSEN1, SREBF2, RHOB, GJA1, SELENOS, TMSB4X, ADAM9, PREB, KDELR2                |
| regulation of leukocyte proliferation                | 5  | 0.025762 | EFNB1, TGFB1, TFRC, HMGB1, TGFBR2                                                                                        |
| cellular cation homeostasis                          | 8  | 0.02587  | GJA1, SMAD4, TGFB1, TFRC, ATP6V0A2, HMOX1, HMGB1, PSEN1                                                                  |
| eye development                                      | 6  | 0.025977 | ACVRL1, TGFB1, NOTCH1, HMGB1, PSEN1, TGFBR2                                                                              |
| regulation of cell development                       | 10 | 0.026315 | SMAD4, TGFB1, NOTCH1, ACE, HMGB2, FN1, PLXNB2, TCF4, CSNK1E, PSEN1                                                       |
| regulation of I-kappaB kinase/NF-kappaB signaling    | 5  | 0.02732  | GJA1, TFRC, TMSB4X, HMOX1, MID2                                                                                          |
| negative regulation of cellular biosynthetic process | 17 | 0.027401 | H2AX, ACVRL1, SMAD4, TGFB1, NOTCH1, HMGB2, HMGB1, PSEN1, SREBF2, MID2, IRF2BPL, H1-2, TIAL1, BACE2, GJA1, SELENOS, ITM2B |
| leukocyte migration                                  | 6  | 0.027458 | MMP14, TGFB1, MOSPD2, HMOX1, HMGB1, THBS1                                                                                |

|                                                     |    |          |                                                                            |
|-----------------------------------------------------|----|----------|----------------------------------------------------------------------------|
| cell morphogenesis                                  | 10 | 0.027785 | EFNB1, GJA1, SMAD4, TGFB1, NOTCH1, FN1, PLXNB2, ECE1, PSEN1, RHOB          |
| T cell activation                                   | 7  | 0.027883 | EFNB1, TGFB1, TFRC, KDEL1, HMGB1, PSEN1, TGFBR2                            |
| negative regulation of immune system process        | 7  | 0.028743 | TGFB1, NOTCH1, SELENOS, HTRA1, HMOX1, HMGB1, THBS1                         |
| positive regulation of leukocyte cell-cell adhesion | 5  | 0.028933 | EFNB1, TGFB1, TFRC, HMGB1, TGFBR2                                          |
| protein import                                      | 5  | 0.028933 | SMAD4, TGFB1, NOTCH1, TMSB4X, PSEN1                                        |
| regulation of neurogenesis                          | 9  | 0.029155 | TGFB1, NOTCH1, ACE, HMGB2, FN1, PLXNB2, TCF4, CSNK1E, PSEN1                |
| cellular ion homeostasis                            | 8  | 0.029172 | GJA1, SMAD4, TGFB1, TFRC, ATP6V0A2, HMOX1, HMGB1, PSEN1                    |
| protein complex subunit organization                | 12 | 0.029232 | SMAD4, TGFB1, RRM2, TFRC, TMSB4X, FN1, TFAM, PREB, HMGB1, TK1, MID1, TTC17 |
| regulation of blood circulation                     | 5  | 0.029262 | GJA1, ACE, MMP2, MYL3, ECE1                                                |
| I-kappaB kinase/NF-kappaB signaling                 | 5  | 0.029594 | GJA1, TFRC, TMSB4X, HMOX1, MID2                                            |
| positive regulation of growth                       | 5  | 0.029594 | MMP14, CCNB1, NOTCH1, FN1, TGFBR2                                          |

|                                                       |    |          |                                                                                                                          |
|-------------------------------------------------------|----|----------|--------------------------------------------------------------------------------------------------------------------------|
| cellular chemical homeostasis                         | 9  | 0.029842 | GJA1, SMAD4, TGFB1, ACE, TFRC, ATP6V0A2, HMOX1, HMGB1, PSEN1                                                             |
| response to other organism                            | 11 | 0.030458 | MAP2K3, GJA1, TGFB1, NOTCH1, ACE, SELENOS, HTRA1, HMGB2, ADAM9, HMGB1, HMGN2                                             |
| protein complex assembly                              | 11 | 0.030754 | SMAD4, TGFB1, RRM2, TFRC, TMSB4X, FN1, TFAM, PREB, HMGB1, TK1, TTC17                                                     |
| protein complex biogenesis                            | 11 | 0.030754 | SMAD4, TGFB1, RRM2, TFRC, TMSB4X, FN1, TFAM, PREB, HMGB1, TK1, TTC17                                                     |
| negative regulation of biosynthetic process           | 17 | 0.030772 | H2AX, ACVRL1, SMAD4, TGFB1, NOTCH1, HMGB2, HMGB1, PSEN1, SREBF2, MID2, IRF2BPL, H1-2, TIAL1, BACE2, GJA1, SELENOS, ITM2B |
| ion homeostasis                                       | 9  | 0.030895 | GJA1, SMAD4, TGFB1, ACE, TFRC, ATP6V0A2, HMOX1, HMGB1, PSEN1                                                             |
| response to external biotic stimulus                  | 11 | 0.030903 | MAP2K3, GJA1, TGFB1, NOTCH1, ACE, SELENOS, HTRA1, HMGB2, ADAM9, HMGB1, HMGN2                                             |
| cell morphogenesis involved in neuron differentiation | 7  | 0.030969 | EFNB1, SMAD4, NOTCH1, FN1, PLXNB2, ECE1, PSEN1                                                                           |

|                                              |    |          |                                                                                                                                                                                                                                                                                                                                                                                                                                                 |
|----------------------------------------------|----|----------|-------------------------------------------------------------------------------------------------------------------------------------------------------------------------------------------------------------------------------------------------------------------------------------------------------------------------------------------------------------------------------------------------------------------------------------------------|
| positive regulation of lymphocyte activation | 6  | 0.031121 | EFNB1, MMP14, TGFB1, TFRC, HMGB1, TGFBR2                                                                                                                                                                                                                                                                                                                                                                                                        |
| response to xenobiotic stimulus              | 6  | 0.031393 | ACE, TFRC, MMP2, HMOX1, THBS1, TGFBR2                                                                                                                                                                                                                                                                                                                                                                                                           |
| organic substance metabolic process          | 61 | 0.031951 | H2AX, ACVRL1, TFRC, RNF14, HMGB2, ECE1, HMGB1, LARP1B, IRF2BPL, TIAL1, GJA1, SMCHD1, HINT2, HERC1, TMSB4X, WDR5, TK1, HMGB1P1, MAP2K3, MMP2, CSNK1E, MID1, MID2, SREBF2, TGFBR2, DDB2, BACE2, MMP14, SELENOS, ADAM9, TFAM, ITGA5, GTF3C1, NOTCH1, RETSAT, HTRA1, PSEN1, AGAP3, THBS1, DNAJB2, CYB5R1, ATXN2, CCNB1, DGLUCY, HMOX1, ATP5MJ, SMAD4, TGFB1, RRM2, ACE, OSBPL3, FN1, CRIM1, TRIP4, NOC3L, H1-2, ERCC2, PLXNB2, TCF4, SERINC1, ITM2B |
| signal transduction                          | 35 | 0.032162 | ACVRL1, RALA, NOTCH1, TFRC, RNF14, HMGB2, HTRA1, ECE1, HMGB1, PSEN1, AGAP3, THBS1, TIAL1, EFNB1, GJA1, TMSB4X, HMOX1, MAP2K3, SMAD4, TGFB1, MMP2, FN1, CRIM1, TRIP4, CSNK1E, MID1, SREBF2, MID2, RHOB, TGFBR2, MMP14, SELENOS, PLXNB2, ADAM9, ITGA5                                                                                                                                                                                             |
| regulation of system process                 | 7  | 0.032359 | GJA1, SMAD4, NOTCH1, ACE, MMP2, MYL3, ECE1                                                                                                                                                                                                                                                                                                                                                                                                      |

|                                                  |    |          |                                                                                                                                                                                                                                                                                                                                                                                                                             |
|--------------------------------------------------|----|----------|-----------------------------------------------------------------------------------------------------------------------------------------------------------------------------------------------------------------------------------------------------------------------------------------------------------------------------------------------------------------------------------------------------------------------------|
| regulation of intracellular protein transport    | 5  | 0.032679 | SMAD4, TGFB1, TMSB4X, PSEN1, SREBF2                                                                                                                                                                                                                                                                                                                                                                                         |
| single-organism cellular process                 | 59 | 0.033771 | H2AX, ACVRL1, TFRC, KDEL1, HMGB2, ECE1, HMGB1, TIAL1, GJA1, HINT2, HERC1, TMSB4X, WDR5, TK1, MAP2K3, MMP2, CSNK1E, MID1, RHOB, TGFB2, BACE2, MMP14, SELENOS, MYL1, ADAM9, PREB, KDEL2, ITGA5, RALA, NOTCH1, RETSAT, HTRA1, MOSPD2, PSEN1, THBS1, DNAJB2, EFNB1, ATXN2, CCNB1, DGLUCY, ATP6V0A2, HMOX1, ATP5MJ, TXNDC5, SMAD4, TGFB1, RRM2, ACE, OSBPL3, FN1, CRIM1, TRIP4, NOC3L, H1-2, TTC17, ERCC2, PLXNB2, TCF4, SERINC1 |
| protein transport                                | 14 | 0.034096 | SMAD4, TGFB1, NOTCH1, TFRC, KDEL1, PSEN1, SREBF2, RHOB, GJA1, SELENOS, TMSB4X, ADAM9, PREB, KDEL2                                                                                                                                                                                                                                                                                                                           |
| leukocyte activation involved in immune response | 5  | 0.034108 | TGFB1, TFRC, HMOX1, HMGB1, PSEN1                                                                                                                                                                                                                                                                                                                                                                                            |
| regulation of vesicle-mediated transport         | 7  | 0.034273 | ATXN2, RALA, TGFB1, NOTCH1, HMOX1, PREB, HMGB1                                                                                                                                                                                                                                                                                                                                                                              |

|                                                                    |    |          |                                                                                                                                  |
|--------------------------------------------------------------------|----|----------|----------------------------------------------------------------------------------------------------------------------------------|
| intracellular signal transduction                                  | 19 | 0.034471 | MAP2K3, RALA, SMAD4, TGFB1, NOTCH1, TFRC, FN1, HMGB1, PSEN1, THBS1, MID1, MID2, RHOB, TIAL1, GJA1, SELENOS, TMSB4X, ADAM9, HMOX1 |
| regulation of MAP kinase activity                                  | 5  | 0.034836 | MAP2K3, TGFB1, ADAM9, PSEN1, THBS1                                                                                               |
| DNA repair                                                         | 7  | 0.035258 | H2AX, SMCHD1, ERCC2, HMGB2, HMGB1, CSNK1E, DDB2                                                                                  |
| cell activation involved in immune response                        | 5  | 0.035574 | TGFB1, TFRC, HMOX1, HMGB1, PSEN1                                                                                                 |
| regulation of protein transport                                    | 7  | 0.035757 | GJA1, SMAD4, TGFB1, TMSB4X, ADAM9, PSEN1, SREBF2                                                                                 |
| skin development                                                   | 5  | 0.03632  | SMAD4, NOTCH1, ERCC2, ADAM9, PSEN1                                                                                               |
| regulation of cell activation                                      | 8  | 0.036839 | EFNB1, MMP14, TGFB1, TFRC, HMOX1, HMGB1, THBS1, TGFBR2                                                                           |
| ATP metabolic process                                              | 5  | 0.037076 | CCNB1, TGFB1, TMSB4X, ATP5MJ, PSEN1                                                                                              |
| negative regulation of cellular macromolecule biosynthetic process | 16 | 0.03711  | H2AX, ACVRL1, SMAD4, TGFB1, NOTCH1, HMGB2, HMGB1, PSEN1, SREBF2, IRF2BPL, H1-2, TIAL1, BACE2, GJA1, SELENOS, ITM2B               |
| cellular response to DNA damage stimulus                           | 9  | 0.037147 | H2AX, SMCHD1, ERCC2, HMGB2, HMOX1, HMGB1, CSNK1E, PSEN1, DDB2                                                                    |

|                                          |    |          |                                                                                                                                                                                                                                                                    |
|------------------------------------------|----|----------|--------------------------------------------------------------------------------------------------------------------------------------------------------------------------------------------------------------------------------------------------------------------|
| heterocycle metabolic process            | 37 | 0.037248 | H2AX, ACVRL1, GTF3C1, NOTCH1, TFRC, RNF14, HMGB2, HTRA1, HMGB1, PSEN1, IRF2BPL, TIAL1, GJA1, ATXN2, SMCHD1, CCNB1, TMSB4X, WDR5, HMOX1, ATP5MJ, TK1, HMGB1P1, MAP2K3, SMAD4, TGFB1, RRM2, CRIM1, TRIP4, CSNK1E, NOC3L, SREBF2, MID2, DDB2, H1-2, ERCC2, TFAM, TCF4 |
| animal organ morphogenesis               | 10 | 0.037289 | ACVRL1, MMP14, SMAD4, TGFB1, NOTCH1, MMP2, MYL3, HTRA1, PSEN1, TGFBR2                                                                                                                                                                                              |
| organelle organization                   | 26 | 0.037482 | H2AX, RALA, NOTCH1, TFRC, HMGB2, HMGB1, PSEN1, GJA1, ATXN2, SMCHD1, CCNB1, TMSB4X, WDR5, HMGN2, SMAD4, TGFB1, TRIP4, MID1, SREBF2, RHOB, TTC17, DDB2, H1-2, ERCC2, TFAM, PREB                                                                                      |
| negative regulation of cell death        | 10 | 0.038406 | SMAD4, NOTCH1, SELENOS, TFRC, HMGB2, HMOX1, ITGA5, PSEN1, THBS1, TXNDC5                                                                                                                                                                                            |
| striated muscle cell differentiation     | 5  | 0.039004 | MMP14, SMAD4, CCNB1, TGFB1, NOTCH1                                                                                                                                                                                                                                 |
| response to biotic stimulus              | 11 | 0.039357 | MAP2K3, GJA1, TGFB1, NOTCH1, ACE, SELENOS, HTRA1, HMGB2, ADAM9, HMGB1, HMGN2                                                                                                                                                                                       |
| protein-DNA complex subunit organization | 5  | 0.039396 | H2AX, HMGB2, TCF4, HMGB1, H1-2                                                                                                                                                                                                                                     |

|                                       |    |          |                                                                                                                                           |
|---------------------------------------|----|----------|-------------------------------------------------------------------------------------------------------------------------------------------|
| sex differentiation                   | 5  | 0.039396 | MMP14, SMAD4, ACE, MMP2, HMGB2                                                                                                            |
| leukocyte differentiation             | 7  | 0.040185 | MMP14, TGFB1, TFRC, KDEL1, HMGB1, PSEN1, TGFBR2                                                                                           |
| developmental maturation              | 5  | 0.040188 | ACVRL1, CCNB1, TGFB1, MMP2, ERCC2                                                                                                         |
| nitrogen compound transport           | 16 | 0.040409 | SMAD4, TGFB1, NOTCH1, TFRC, KDEL1, PSEN1, SREBF2, RHOB, TGFBR2, ATXN2, GJA1, SELENOS, TMSB4X, ADAM9, PREB, KDEL2                          |
| regulation of secretion by cell       | 7  | 0.040456 | GJA1, SMAD4, RALA, TGFB1, NOTCH1, ADAM9, HMOX1                                                                                            |
| regulation of protein kinase activity | 8  | 0.040534 | MAP2K3, CCNB1, TGFB1, ACE, ADAM9, PSEN1, THBS1, TGFBR2                                                                                    |
| cellular localization                 | 20 | 0.041173 | RALA, SMAD4, TGFB1, NOTCH1, TFRC, KDEL1, CSNK1E, PSEN1, MID1, SREBF2, MID2, RHOB, MMP14, GJA1, CCNB1, SELENOS, TMSB4X, HMOX1, PREB, KDEL2 |
| anatomical structure homeostasis      | 6  | 0.041255 | DNAJB2, TGFB1, NOTCH1, TFRC, POTEJ, PSEN1                                                                                                 |
| chemical homeostasis                  | 11 | 0.041884 | BACE2, GJA1, SMAD4, TGFB1, ACE, TFRC, ATP6V0A2, HMOX1, HMGB1, PSEN1, SREBF2                                                               |
| cellular response to oxidative stress | 5  | 0.042207 | SELENOS, MMP2, HMOX1, AGAP3, RHOB                                                                                                         |



|                                              |    |          |                                                                                                                                                                                                                                                                                                                                                                                       |
|----------------------------------------------|----|----------|---------------------------------------------------------------------------------------------------------------------------------------------------------------------------------------------------------------------------------------------------------------------------------------------------------------------------------------------------------------------------------------|
| peptide transport                            | 14 | 0.042256 | SMAD4, TGFB1, NOTCH1, TFRC, KDELR1, PSEN1, SREBF2, RHOB, GJA1, SELENOS, TMSB4X, ADAM9, PREB, KDELR2                                                                                                                                                                                                                                                                                   |
| cellular aromatic compound metabolic process | 37 | 0.042286 | H2AX, ACVRL1, GTF3C1, NOTCH1, TFRC, RNF14, HMGB2, HTRA1, HMGB1, PSEN1, IRF2BPL, TIAL1, GJA1, ATXN2, SMCHD1, CCNB1, TMSB4X, WDR5, HMOX1, ATP5MJ, TK1, HMGB1P1, MAP2K3, SMAD4, TGFB1, RRM2, CRIM1, TRIP4, CSNK1E, NOC3L, SREBF2, MID2, DDB2, H1-2, ERCC2, TFAM, TCF4                                                                                                                    |
| lymphocyte proliferation                     | 5  | 0.042618 | EFNB1, TGFB1, TFRC, HMGB1, TGFBR2                                                                                                                                                                                                                                                                                                                                                     |
| extracellular matrix organization            | 5  | 0.043031 | MMP14, TGFB1, NOTCH1, MMP2, ERCC2                                                                                                                                                                                                                                                                                                                                                     |
| metabolic process                            | 62 | 0.043075 | H2AX, ACVRL1, TFRC, RNF14, HMGB2, ECE1, HMGB1, LARP1B, IRF2BPL, TIAL1, GJA1, SMCHD1, HINT2, HERC1, TMSB4X, WDR5, TK1, HMGB1P1, MAP2K3, MMP2, CSNK1E, MID1, MID2, SREBF2, TGFBR2, DDB2, BACE2, MMP14, SELENOS, ADAM9, TFAM, ITGA5, GTF3C1, NOTCH1, RETSAT, HTRA1, PSEN1, AGAP3, THBS1, DNAJB2, CYB5R1, ATXN2, CCNB1, DGLUCY, ATP6V0A2, HMOX1, ATP5MJ, SMAD4, TGFB1, RRM2, ACE, OSBPL3, |

|                                                     |    |          |                                                                          |
|-----------------------------------------------------|----|----------|--------------------------------------------------------------------------|
|                                                     |    |          | FN1, CRIM1, TRIP4, NOC3L, H1-2, ERCC2, PLXNB2, TCF4, SERINC1, ITM2B      |
| extracellular structure organization                | 5  | 0.043446 | MMP14, TGFB1, NOTCH1, MMP2, ERCC2                                        |
| regulation of establishment of protein localization | 7  | 0.043513 | GJA1, SMAD4, TGFB1, TMSB4X, ADAM9, PSEN1, SREBF2                         |
| leukocyte cell-cell adhesion                        | 6  | 0.043563 | EFNB1, TGFB1, TFRC, HMGB1, ITGA5, TGFBR2                                 |
| cellular macromolecular complex assembly            | 11 | 0.043948 | H2AX, ATXN2, SMAD4, TGFB1, TMSB4X, HMGB2, TFAM, TCF4, HMGB1, TTC17, H1-2 |
| spermatogenesis                                     | 7  | 0.044371 | H2AX, GJA1, SMAD4, CCNB1, NOTCH1, ACE, HMGB2                             |
| regulation of peptide transport                     | 7  | 0.04524  | GJA1, SMAD4, TGFB1, TMSB4X, ADAM9, PSEN1, SREBF2                         |
| male gamete generation                              | 7  | 0.045532 | H2AX, GJA1, SMAD4, CCNB1, NOTCH1, ACE, HMGB2                             |
| negative regulation of apoptotic process            | 9  | 0.045815 | NOTCH1, SELENOS, TFRC, HMGB2, HMOX1, ITGA5, PSEN1, THBS1, TXNDC5         |
| response to inorganic substance                     | 7  | 0.045826 | CCNB1, TFRC, MMP2, ADAM9, HMOX1, THBS1, RHOB                             |
| positive regulation of cell-cell adhesion           | 5  | 0.046416 | EFNB1, TGFB1, TFRC, HMGB1, TGFBR2                                        |
| cellular response to hormone stimulus               | 7  | 0.046712 | GJA1, TGFB1, NOTCH1, ACE, SELENOS, RNF14, TRIP4                          |

|                                                                  |              |                |                                                                                                     |
|------------------------------------------------------------------|--------------|----------------|-----------------------------------------------------------------------------------------------------|
| peptidyl-serine phosphorylation                                  | 5            | 0.046849       | CCNB1, TGFB1, TFRC, CSNK1E, TGFBR2                                                                  |
| transmembrane receptor protein tyrosine kinase signaling pathway | 7            | 0.04701        | EFNB1, TGFB1, MMP2, CRIM1, ITGA5, PSEN1, THBS1                                                      |
| regulation of hydrolase activity                                 | 10           | 0.047522       | DNAJB2, TMSB4X, MYL3, CRIM1, HMGB2, FN1, PLXNB2, HMGB1, AGAP3, THBS1                                |
| endocytosis                                                      | 8            | 0.048103       | ATXN2, TGFB1, TFRC, HMGB1, CSNK1E, THBS1, TGFBR2, TXNDC5                                            |
| amide transport                                                  | 14           | 0.048591       | SMAD4, TGFB1, NOTCH1, TFRC, KDELR1, PSEN1, SREBF2, RHOB, GJA1, SELENOS, TMSB4X, ADAM9, PREB, KDELR2 |
| regulation of ERK1 and ERK2 cascade                              | 5            | 0.048605       | SMAD4, TGFB1, NOTCH1, FN1, HMGB1                                                                    |
| single-organism biosynthetic process                             | 12           | 0.048777       | CYB5R1, TGFB1, RRM2, HINT2, SELENOS, TMSB4X, OSBPL3, WDR5, ATP5MJ, SERINC1, TK1, SREBF2             |
| purine ribonucleoside triphosphate metabolic process             | 5            | 0.04905        | CCNB1, TGFB1, TMSB4X, ATP5MJ, PSEN1                                                                 |
| response to radiation                                            | 6            | 0.049129       | H2AX, TGFB1, MMP2, ERCC2, RHOB, DDB2                                                                |
| <b>Pathway</b>                                                   | <b>Count</b> | <b>P Value</b> | <b>Genes</b>                                                                                        |

|                                                      |    |          |                                                                                |
|------------------------------------------------------|----|----------|--------------------------------------------------------------------------------|
| AGE-RAGE signaling pathway in diabetic complications | 5  | 0.002534 | SMAD4, TGFB1, MMP2, FN1, TGFBR2                                                |
| Colorectal cancer                                    | 5  | 0.001455 | SMAD4, RALA, TGFB1, TGFBR2, DDB2                                               |
| FoxO signaling pathway                               | 5  | 0.006649 | SMAD4, CCNB1, TGFB1, CSNK1E, TGFBR2                                            |
| Hepatitis B                                          | 5  | 0.013785 | MAP2K3, SMAD4, TGFB1, TGFBR2, DDB2                                             |
| Hepatocellular carcinoma                             | 5  | 0.01557  | SMAD4, TGFB1, HMOX1, TGFBR2, DDB2                                              |
| Human papillomavirus infection                       | 6  | 0.040671 | NOTCH1, ATP6V0A2, FN1, ITGA5, PSEN1, THBS1                                     |
| Pancreatic cancer                                    | 5  | 0.000917 | SMAD4, RALA, TGFB1, TGFBR2, DDB2                                               |
| Pathways in cancer                                   | 9  | 0.010105 | SMAD4, RALA, TGFB1, NOTCH1, MMP2, FN1, HMOX1, TGFBR2, DDB2                     |
| Proteoglycans in cancer                              | 5  | 0.029797 | TGFB1, MMP2, FN1, ITGA5, THBS1                                                 |
| Degradation of the extracellular matrix              | 6  | 0.00087  | MMP14, MMP2, HTRA1, FN1, ADAM9, PSEN1                                          |
| Developmental Biology                                | 12 | 0.033766 | H2AX, EFN1, SMAD4, TGFB1, NOTCH1, MMP2, WDR5, TCF4, ITGA5, PSEN1, SREBF2, RHOB |
| Extracellular matrix organization                    | 9  | 0.00018  | MMP14, TGFB1, MMP2, HTRA1, FN1, ADAM9, ITGA5, PSEN1, THBS1                     |

|                                                          |    |          |                                                                                                                                                  |
|----------------------------------------------------------|----|----------|--------------------------------------------------------------------------------------------------------------------------------------------------|
| Platelet activation, signaling and aggregation           | 6  | 0.012826 | CYB5R1, TGFB1, TMSB4X, FN1, THBS1, RHOB                                                                                                          |
| Platelet degranulation                                   | 5  | 0.004879 | CYB5R1, TGFB1, TMSB4X, FN1, THBS1                                                                                                                |
| Response to elevated platelet cytosolic Ca <sup>2+</sup> | 5  | 0.00558  | CYB5R1, TGFB1, TMSB4X, FN1, THBS1                                                                                                                |
| Signal Transduction                                      | 21 | 0.041367 | H2AX, ACVRL1, RALA, SMAD4, TGFB1, NOTCH1, TFRC, MMP2, MOSPD2, FN1, ECE1, CSNK1E, PSEN1, THBS1, RHOB, TGFBR2, TIAL1, GJA1, HINT2, ATP6V0A2, ITGA5 |
| Signaling by Interleukins                                | 7  | 0.035632 | MAP2K3, RALA, TGFB1, MMP2, FN1, HMOX1, HMGB1                                                                                                     |
